# Supplementary material for: Facile access to 3,5-disubstituted 1,2,4-thiadiazoles via T3P®-mediated oxidative dimerization of thioamides
Source: Royal Society of Chemistry journal article supplement (doi:10.1039/d5nj03477a), 2026-01-01
Supplement: d5nj03477a1.pdf [file d5nj03477a1.pdf]

## Supporting Information

### Facile access to 3,5-disubstituted 1,2,4-thiadiazoles via T3P® mediated oxidative dimerization of thioamides

Poosa Mallesham<sup>a,b</sup>, Yesham SaiKala<sup>a</sup>, Mahesh Ranga<sup>a</sup>, Venkatesh Miriyala<sup>a</sup>, Paul Douglas Sanasi<sup>b</sup>, Krishna S Ethiraj<sup>a</sup>,  
Satyanarayana Yennam<sup>a</sup>, Manoranjan Behera<sup>a\*</sup>

<sup>a</sup>Chemistry Services, Aragen Life Sciences Pvt Ltd, Survey No: 125 (part) & 126, IDA Mallapur, Hyderabad-500076, Telangana State, India

<sup>b</sup>Department of Engineering Chemistry, Andhra University, Waltair Junction, Visakhapatnam, Andhra Pradesh, 530003, India

E-mail: [Manoranjan.behera@aragen.com](mailto:Manoranjan.behera@aragen.com); Tel: +040 67483507

---

## Contents

|                                                       |      |
|-------------------------------------------------------|------|
| 1. General                                            | 1    |
| 2. General Experimental procedure for compounds 2a-2r | 2-7  |
| 3. References                                         | 8    |
| 4. Spectral data 2a-2t                                | 8-58 |

**General Information:**

Dry solvents were purchased from chemical suppliers and used without further purification. Analytical thin-layer chromatography (TLC) was performed on commercially available Merck TLC Silica gel 60 F<sub>254</sub>. Silica gel column chromatography was performed on silica gel 60 (spherical 100-200  $\mu\text{m}$ ). IR spectra were recorded on Perkin-Elmer FT/IR-4000 using ATR.  $^1\text{H}$  NMR spectra were recorded on Varian-400 (400 MHz) spectrometer. Chemical shifts of  $^1\text{H}$  NMR spectra were reported relative to tetra methyl silane ( $^{13}\text{C}$  NMR spectra were recorded on Varian-400 (100 MHz) spectrometer. Chemical shifts of  $^{13}\text{C}$  NMR spectra were reported to relative to  $\text{CDCl}_3$  (77.16) and  $\text{DMSO-d}_6$  (39.5). Splitting patterns were reported as s, singlet; d, doublet; t, triplet; q, quartet; m, multiplet; br, broad.

**General Procedure: Preparation of 3,5-diphenyl-1,2,4-thiadiazole (2a)<sup>1</sup>**

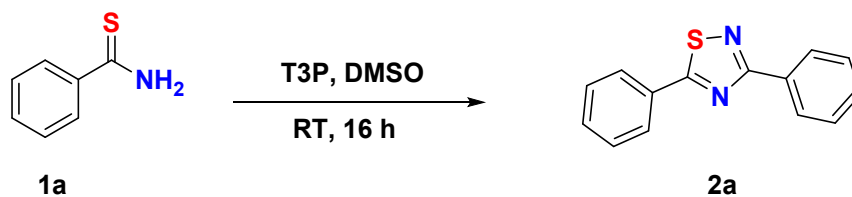

To a stirred solution of compound **1a** (10 g, 72.992 mmol) in DMSO (250 ml) was added 50% T<sub>3</sub>P in ethyl acetate solution (46.4 ml, 72.992 mmol) at 25°C and the reaction mixture was stirred at 25°C for 16 h. The progress of the reaction was monitored by TLC, the reaction mixture was poured in to ice cold water (250 ml) and ethyl acetate (500 ml). The organic layer was separated and washed with water (200 ml) and brine solution (200 ml), dried over anhydrous sodium sulphate, filtered and concentrated under reduced pressure to afford the crude compound. The crude compound was purified by flash column chromatography (silica gel; 20% ethyl acetate/pet ether) to give the pure compound **2a** (8.45 g, 97%) as an off white solid.; m.p. 89-90°C (Reported 87-89 °C)<sup>1</sup>; <sup>1</sup>H NMR (400 MHz, DMSO-*d*<sub>6</sub>) δ = 6.31-8.34 (m, 2H), 6.14 (dd, *J* = 1.6 Hz, 2H), 7.56 - 7.67 (m, 6H) (<sup>1</sup>H-NMR data matching with the literature value)<sup>1</sup>; <sup>13</sup>C NMR (100 MHz, DMSO-*d*<sub>6</sub>) = 188.0, 172.8, 132.5, 132.1, 130.7, 129.7, 129.6, 129.0, 127.8, 127.4; MS (EI): *m/z* = 239.42 (M+1,100).

**3,5-di-*p*-tolyl-1,2,4-thiadiazole (2b)<sup>1</sup>**

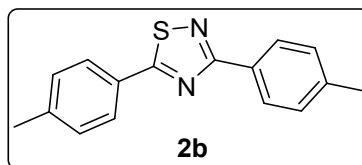

The title compound was prepared from 4-methylbenzothioamide (200 mg) according to the general procedure and purified by column chromatography to give off white solid.; Yield (165 mg, 93%); m.p. 128-130°C; <sup>1</sup>H NMR (400 MHz, DMSO-*d*<sub>6</sub>) δ = 8.20 (d, *J* = 6.8 Hz, 2H), 8.01 (d, *J* = 6.8 Hz, 2H), 7.43 (d, *J* = 6.4 Hz, 2H), 7.38 (d, *J* = 6.8 Hz, 2H), 2.41 (s, 3H), 2.39 (s, 3H); <sup>13</sup>C NMR (100 MHz, DMSO-*d*<sub>6</sub>) = 187.7, 172.7, 142.7, 140.4, 130.0, 129.5, 129.52, 127.8, 127.3, 127.1, 21.1, 21.0; MS (EI): *m/z* = 267.02 (M+1,100).

**3,5-bis(4-chlorophenyl)-1,2,4-thiadiazole (2c)<sup>2,3,5</sup>**

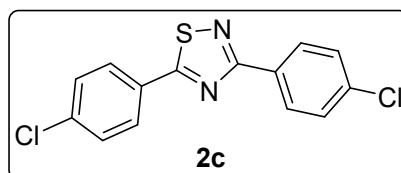

The title compound was prepared from 4-chlorobenzothioamide (200 mg) according to the general procedure and purified by column chromatography to give off white solid.; Yield (161 mg, 90%); m.p. 150-152°C; <sup>1</sup>H NMR (400 MHz, CDCl<sub>3</sub>) δ = 8.31 (d, *J*

= 8.4 Hz, 2H), 7.97 (d,  $J$  = 8.8 Hz, 2H), 7.50 (d,  $J$  = 8.8 Hz, 2H), 7.7.47 (d,  $J$  = 8.8 Hz, 2H) ;  $^{13}\text{C}$  NMR (100 MHz,  $\text{CDCl}_3$ ) = 187.0, 172.7, 138.1, 136.5, 131.1, 130.2, 129.63, 129.60, 128.9, 128.6.; MS (EI):  $m/z$  = 307.34 ( $M+1$ ,100).

**3,5-bis(2-chlorophenyl)-1,2,4-thiadiazole (2d)<sup>1,3</sup>**

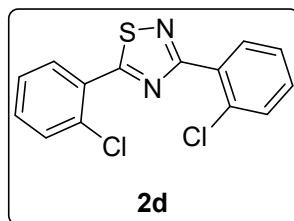

The title compound was prepared from 2-chlorobenzothioamide (200 mg) according to the general procedure and purified by column chromatography to give off white solid.; Yield (158 mg, 88%); m.p. 84-86°C;  $^1\text{H}$  NMR (500 MHz,  $\text{DMSO}-d_6$ )  $\delta$  = 8.55 (dd,  $J$  = 1.0 Hz, 1.5 Hz, 1H), 8.05 (dd,  $J$  = 1.0 Hz, 1.5 Hz, 1H), 7.82 (d,  $J$  = 7.5 Hz, 1H), 7.70-7.53 (m, 5H);  $^{13}\text{C}$  NMR (125 MHz,  $\text{DMSO}-d_6$ ) = 182.6, 169.1, 133.3, 132.7, 132.2, 131.9, 131.6, 131.2, 130.6, 130.68, 130.2, 128.4, 128.2, 127.4.; MS (EI):  $m/z$  = 306.91 ( $M+1$ ,100).

**3,5-bis(3-chlorophenyl)-1,2,4-thiadiazole (2e)<sup>2</sup>**

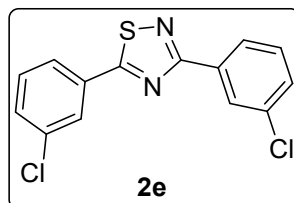

The title compound was prepared from 3-chlorobenzothioamide (200 mg) according to the general procedure and purified by column chromatography to give off white solid.; Yield (161 mg, 90%); m.p. 121-123°C;  $^1\text{H}$  NMR (400 MHz,  $\text{DMSO}-d_6$ )  $\delta$  = 8.27 (s, 1H), 8.25 (d,  $J$  = 7.5 Hz, 1H), 8.19 (s, 1H), 8.09 (d,  $J$  = 8.0 Hz, 1H), 8.72-7.57 (m, 4H);  $^{13}\text{C}$  NMR (100 MHz,  $\text{DMSO}-d_6$ ) = 186.8, 171.2, 134.2, 133.781, 133.768, 132.2, 131.5, 131.3, 131.1, 130.6, 127.4, 126.8, 126.5, 126.4; MS (EI):  $m/z$  = 307.39 ( $M+1$ ,100).

**Dimethyl 4,4'-(1,2,4-thiadiazole-3,5-diyl)dibenzoate (2f)<sup>7</sup>**

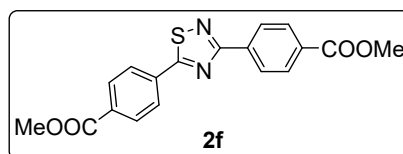

The title compound was prepared from methyl 4-carbamothioylbenzoate (200 mg) according to the general procedure and purified by column chromatography to give off white solid.; Yield (108 mg, 59%); m.p. 253-255°C.;  $^1\text{H}$  NMR (400 MHz,  $\text{CDCl}_3$ )  $\delta$  = 8.83 (d,  $J$  = 8.0 Hz, 2H), 8.47 (d,  $J$  = 8.0 Hz, 1H), 8.25 - 8.12 (m, 4H), 3.99 (Br s, 6H), 1.25 (s, 1H, Extra peak), 0.84 (m, 0.24H, Extra



peak) ;  $^{13}\text{C}$  NMR (100 MHz,  $\text{DMSO}-d_6$ ) = 187.2, 171.2, 166.6, 166.5, 166.0, 139.6, 133.8, 130.5, 130.0, 129.9, 128.9, 128.3, 127.4, 52.4, 29 (Extra peak),; MS (EI):  $m/z$  = 355.43 (M+1,100).

**3,5-bis(2-methoxyphenyl)-1,2,4-thiadiazole (2g)<sup>3</sup>**

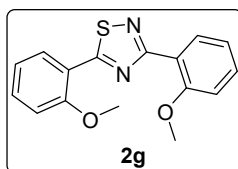

The title compound was prepared from 2-methoxybenzothioamide (200 mg) according to the general procedure and purified by column chromatography to give off white solid,; Yield (161 mg, 90%),; m.p. 123-125°C;  $^1\text{H}$  NMR (400 MHz,  $\text{DMSO}-d_6$ )  $\delta$  = 3.85 (s, 3H), 4.14 (s, 3H), 7.12 (t,  $J$  = 7.6 Hz, 1H), 7.23 (m, 2H), 7.38 (d,  $J$  = 8.4 Hz, 1H), 7.53 (td,  $J$  = 8.0 Hz,  $J$  = 1.6 Hz), 7.66 (td,  $J$  = 8.0 Hz,  $J$  = 1.6 Hz), 7.90 (dd,  $J$  = 7.6 Hz, 1.6 Hz, 1H), 8.38 (dd,  $J$  = 7.6 Hz,  $J$  = 1.6 Hz, 1H),;  $^{13}\text{C}$  NMR (100 MHz,  $\text{DMSO}-d_6$ ) = 179.9, 169.1, 157.5, 157.3, 133.3, 131.4, 131.3, 127.5, 122.4, 121.3, 120.2, 118.8, 112.5, 112.25, 56.3, 55.8; MS (EI):  $m/z$  = 299.01 (M+1,100).

Note: At 7.23 ppm two peaks were merged

**3,5-bis(1-phenylcyclopropyl)-1,2,4-thiadiazole (2h):**

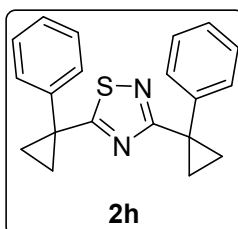

The title compound was prepared from 1-phenylcyclopropane-1-carbothioamide (200 mg) according to the general procedure and purified by column chromatography to give off white solid,; Yield (125 mg, 69%),; m.p. 115-117°C;  $^1\text{H}$  NMR (500 MHz,  $\text{CDCl}_3$ )  $\delta$  = 1.36 (q,  $J$  = 4.0 Hz, 2H), 1.50 (q,  $J$  = 4.0 Hz, 2H), 1.68 (q,  $J$  = 4.0 Hz, 2H), 1.80 (q,  $J$  = 4.0 Hz, 2H), 7.47 - 7.24 (m, 10H), ;  $^{13}\text{C}$  NMR (100 MHz,  $\text{DMSO}-d_6$ ) = 198.1, 178.9, 141.4, 140.3, 130.2, 129.8, 128.9, 128.4, 128.0, 126.6, 28.8, 28.6, 20.2, 16.8,; MS (EI):  $m/z$  = 319.09 (M+1,100).

**3,5-bis(4-bromophenyl)-1,2,4-thiadiazole (2i)<sup>2,5</sup>**

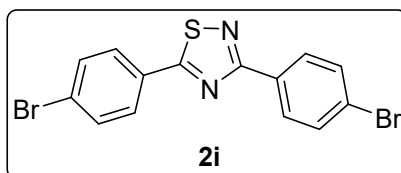

The title compound was prepared from 4-bromobenzothioamide (200 mg) according to the general procedure and purified by column chromatography to give off white solid,; Yield (165 mg, 90%),; m.p. 158-160°C;  $^1\text{H}$  NMR (400 MHz,  $\text{CDCl}_3$ )  $\delta$  = 8.24 (d,

$J = 8.8$  Hz, 2H), 7.90 (d,  $J = 8.8$  Hz, 2H), 7.67 (d,  $J = 8.8$  Hz, 2H), 7.63 (d,  $J = 8.8$  Hz, 2H),;  $^{13}\text{C}$  NMR (100 MHz,  $\text{CDCl}_3$ ) = 187.1, 172.8, 132.5, 131.9, 131.5, 129.8, 129.3, 128.8, 126.5, 125.0,; MS (EI):  $m/z = 395.25$  ( $M+1$ ,100).

**3,5-bis(2-fluorophenyl)-1,2,4-thiadiazole (2j)<sup>4</sup>**

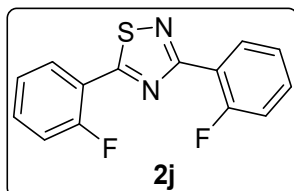

The title compound was prepared from 2-Fluorobenzothioamide (200 mg) according to the general procedure and purified by column chromatography to give off white solid,; Yield (155 mg, 88%),; m.p. 113-115°C;  $^1\text{H}$  NMR (400 MHz,  $\text{DMSO}-d_6$ )  $\delta = 7.46$ -7.39 (m, 2H), 7.53 (td,  $J = 1.2$  Hz,  $J = 1.2$  Hz,  $J = 1.2$  Hz, 1H), 7.67 – 7.56 (m, 2H), 7.75 – 7.71 (m, 1H), 8.30 (td,  $J = 2.0$  Hz,  $J = 2.0$  Hz,  $J = 1.6$ , 1H), 8.42 (td,  $J = 1.6$  Hz,  $J = 1.6$  Hz,  $J = 1.6$  Hz, 1H);  $^{13}\text{C}$  NMR (100 MHz,  $\text{DMSO}-d_6$ ) = 179.59 ( $^3\text{J-CF}$  : d, 4.4Hz), 167.63 ( $^3\text{J-CF}$  : d, 5.1Hz), 158.70 ( $^1\text{J-CF}$  : d, 253.60Hz), 159.39 ( $^1\text{J-CF}$  : d, 250.10Hz), 134.37 ( $^3\text{J-CF}$  : d, 9.0Hz), 132.65 ( $^3\text{J-CF}$  : d, 8.5Hz), 131.64, 128.36, 125.74 ( $^4\text{J-CF}$  : d, 2.8Hz), 124.75 ( $^4\text{J-CF}$  : d, 3.5Hz), 120.03 ( $^2\text{J-CF}$  : d, 102Hz), 117.60 ( $^2\text{J-CF}$  : d, 12.1Hz), 116.81 ( $^2\text{J-CF}$  : d, 21.2Hz), 116.31 ( $^2\text{J-CF}$  : d, 20.6Hz),; MS (EI):  $m/z = 275.07$  ( $M+1$ ,100).

**3,5-bis(3,5-difluorophenyl)-1,2,4-thiadiazole (2k):**

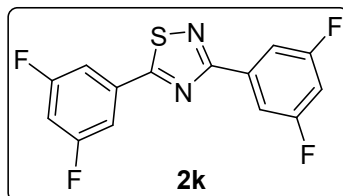

The title compound was prepared from 3,5-difluorobenzothioamide (200 mg) according to the general procedure and purified by column chromatography to give off white solid, Yield (152 mg, 84%),; m.p. 168-172°C;  $^1\text{H}$  NMR (400 MHz,  $\text{CDCl}_3$ )  $\delta = 7.90$  (dd,  $J = 2.0$  Hz,  $J = 2.4$  Hz, 2H), 7.58 (dd,  $J = 2.0$  Hz,  $J = 2.4$  Hz, 2H), 7.04 (tt,  $J = 8.4$  Hz,  $J = 2.4$  Hz, 1H), 6.96 (tt,  $J = 8.80$  Hz,  $J = 2.4$  Hz, 1H),;  $^{13}\text{C}$  NMR (100 MHz,  $\text{CDCl}_3$ ) = 186.1, 171.67, 164.37, 161.91 (dd,  $^1\text{J-CF}$ : 246.80Hz, 12.40Hz), 162.064, 164.56 (dd,  $^1\text{J-CF}$ : 246.80Hz, 12.40Hz), 135.27 (t,  $^3\text{J-CF}$ : 10.0 Hz), 132.86 (t,  $^3\text{J-CF}$ : 10.0 Hz), 111.28 (dd,  $^2\text{J-CF}$ : 26.0 Hz, 7.40 Hz), 110.59 (dd,  $^2\text{J-CF}$ : 27.0 Hz, 8.0 Hz), 107.38 (t,  $^2\text{J-CF}$ : 25.2 Hz), 105.96 (t,  $^2\text{J-CF}$ : 25.2 Hz),; MS (EI):  $m/z = 311.38$  ( $M+1$ ,100).

**3,5-bis(4-iodophenyl)-1,2,4-thiadiazole (2l)<sup>4</sup>**

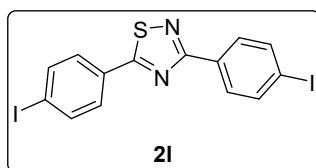

The title compound was prepared from 4-iodobenzothioamide (200 mg) according to the general procedure and purified by column chromatography to give off white solid.; Yield (160 mg, 86%); m.p. 232-235°C; <sup>1</sup>H NMR (500 MHz, CDCl<sub>3</sub>) δ = 8.11 (d, *J* = 8.4 Hz, 2H), 7.89 (d, *J* = 8.4 Hz, 2H), 7.85 (d, *J* = 8.8 Hz, 2H), 7.77 (d, *J* = 8.4 Hz, 2H); <sup>13</sup>C NMR (100 MHz, CDCl<sub>3</sub>) = 187.3, 173.0, 138.5, 138.0, 137.9, 132.1, 129.9, 128.7, 98.77, 97.23; MS (EI): *m/z* = 491.22 (M+1,100).

**3,5-di-*m*-tolyl-1,2,4-thiadiazole (2m)<sup>3,5</sup>**

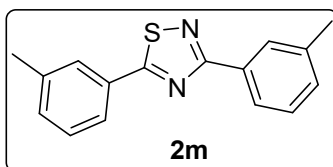

The title compound was prepared from 3-methylbenzothioamide (200 mg) according to the general procedure and purified by column chromatography to give off white solid.; Yield (153 mg, 86%); m.p. 53-55°C; <sup>1</sup>H NMR (500 MHz, DMSO-*d*<sub>6</sub>) δ = 8.13 (br s, 1H), 8.11 (d, *J* = 7.5 Hz, 1H), 7.93 (br s, 1H), 7.90 (dd, *J* = 7.5 Hz, 1.98 Hz, 1H), 7.51-7.43 (m, 3H), 7.37 (d, *J* = 7.5 Hz, 1H), 2.435 (s, 3H), 2.431 (s, 3H); <sup>13</sup>C NMR (125 MHz, DMSO-*d*<sub>6</sub>) = 188.0, 172.9, 139.1, 138.2, 133.0, 132.0, 131.3, 129.6, 129.4, 128.8, 128.3, 127.6, 125.0, 124.5, 20.9, 20.7; MS (EI): *m/z* = 267.24 (M+1,100).

**3,5-dicyclopropyl-1,2,4-thiadiazole (2n)<sup>6</sup>**

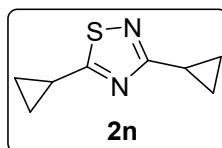

The title compound was prepared from cyclopropanecarbothioamide (200 mg) according to the general procedure and purified by column chromatography to give pale yellow liquid, Yield (106 mg, 64%); <sup>1</sup>H NMR (500 MHz, DMSO-*d*<sub>6</sub>) δ = 2.60-2.57 (m, 1H), 2.23-2.19 (m, 1H), 1.25-1.21 (m, 2H), 1.04-0.92 (m, 6H); <sup>13</sup>C NMR (125 MHz, DMSO-*d*<sub>6</sub>) = 193.8, 177.2, 13.2, 12.3, 12.1, 10.86 (Extra peak), 9.0; MS (EI): *m/z* = 167.0932 (M+1,100).

**3,5-di(pyridin-4-yl)-1,2,4-thiadiazole (2o)<sup>5</sup>**

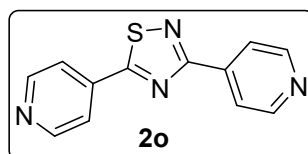

The title compound was prepared from pyridine-4-carbothioamide (200 mg) according to the general procedure and purified by column chromatography to give off white solid.; Yield (104 mg, 60%); m.p. 88-90°C; <sup>1</sup>H NMR (400 MHz, CDCl<sub>3</sub>) δ = 8.83 (dd, *J* = 1.6 Hz, *J* = 1.6 Hz, 4H), 7.55 (dd, *J* = 1.6 Hz, *J* = 1.6 Hz, 4H), 2.62 (DMSO solvent present); <sup>13</sup>C NMR (100 MHz, DMSO-*d*<sub>6</sub>) = 186.8, 171.0, 151.1, 150.8, 138.2, 135.9, 121.6, 121.1; MS (EI): *m/z* = 241.07 (M+1,100).

**3,5-di(pyridin-4-yl)-1,2,4-thiadiazole (2p)<sup>1,3</sup>**

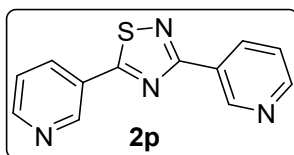

The title compound was prepared from pyridine-3-carbothioamide (200 mg) according to the general procedure and purified by column chromatography to give off white solid,; Yield (130 mg, 75%),; m.p. 129-131°C; <sup>1</sup>H NMR (500 MHz, DMSO-*d*<sub>6</sub>) δ = 9.48 (d, *J* = 1.5 Hz, 1H), 9.33 (d, *J* = 2.0 Hz, 1H), 8.83 (dd, *J* = 1.5 Hz, *J* = 2.0 Hz, 1H), 8.77 (dd, *J* = 1.5 Hz, *J* = 1.5 Hz, 1H), 8.64 (dt, *J* = 2.0 Hz, *J* = 2.0 Hz, 1H), 8.54 (dt, *J* = 2.0 Hz, *J* = 2.0 Hz, 1H), 7.68-7.67 (m, 1H), 7.66-7.63 (m, 1H), <sup>13</sup>C NMR (125 MHz, DMSO-*d*<sub>6</sub>) = 182.8, 170.6, 152.9, 151.4, 148.7, 148.0, 135.2, 135.0, 127.7, 125.8, 124.4, 124.1,; MS (EI): *m/z* = 240.90 (M+1,100).

**5-phenyl-3-(*p*-tolyl)-1,2,4-thiadiazole (2q+2r):**

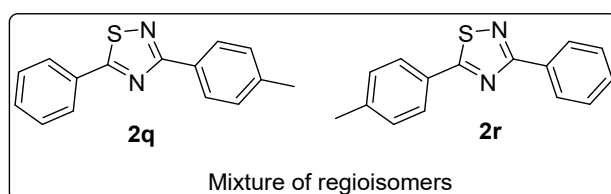

The title compound was prepared from Benzothioamide (**1a**, 100 mg) and 4-methylbenzothioamide (**1b**) (110 mg) according to the general procedure and purified by column chromatography to give the mixture of (**2q+2r**) as an off white solid,; Yield (49 mg mixture of 2q & 2r, 27%), 28% of compound **2a** and 30% of compound **2b** ; <sup>1</sup>H NMR (400 MHz, DMSO-*d*<sub>6</sub>) δ = 2.41 (d, *J* = 5.6 Hz, 3H), 7.43 (dd, *J* = 8.0 Hz, *J* = 8.0 Hz, 2H), 7.66-7.56 (m, 3H), 8.02 (d, *J* = 8.0 Hz, 1H), 8.12 (dd, *J* = 1.6 Hz, *J* = 1.6 Hz, 1H), 8.22 (d, *J* = 8.4 Hz, 1H), 8.32-8.30 (m, 1H),; <sup>13</sup>C NMR (100 MHz, DMSO-*d*<sub>6</sub>) = 187.9, 187.8, 172.9, 172.7, 142.7, 140.5, 132.4, 132.1, 130.6, 130.1, 129.7, 129.57, 129.55, 128.9, 127.8, 127.37, 127.33, 127.1, 21.1, 21.0,; MS (EI): *m/z* = 252.99 (M+1,100).

**Note:** The separation of **2q** and **2r** by prep HPLC was not successful. So, it was not possible to assign the peaks in the mixtures as the difference between **2q** and **2r** is the phenyl substitution at the 3 and 5 position of thiadiazole ring. The <sup>1</sup>H-NMR and <sup>13</sup>C NMR clearly shows mixture of regioisomers.

HPLC ratio is 56.8:43.92 (~3:2)

**methyl 4-(5-phenyl-1,2,4-thiadiazol-3-yl) benzoate (2s+2t):**

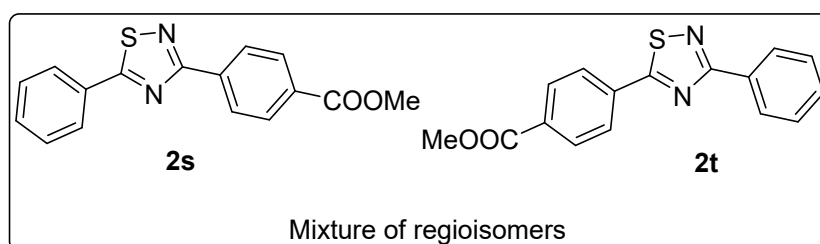

The title compound was prepared from Benzothioamide (**1a**, 100 mg) and compound **1f** according to the general procedure and purified by column chromatography to give the mixture of (**2s+2t**) as an off white solid,; Yield (64 mg mixture of 2s & 2t, 30%),

27% of compound **2a** and 28% of compound **2f** off white solid.; <sup>1</sup>H NMR (400 MHz, DMSO-*d*<sub>6</sub>) δ = 3.90 (s, 3H), 7.69-7.56 (m, 3H), 8.15-8.11 (m, 3H), 8.25 (d, *J* = 8.4 Hz, 1H), 8.32-8.30 (m, 1H), 8.42 (d, *J* = 8.4 Hz, 1H); <sup>13</sup>C NMR (100 MHz, DMSO-*d*<sub>6</sub>) = 188.4, 186.7, 173.0, 171.7, 165.7, 165.3, 135.8, 133.4, 132.6, 131.9, 131.1, 130.8, 130.2, 129.8, 129.6, 129.5, 129.0, 128.7, 128.1, 127.9, 52.4, 52.3; MS (EI): *m/z* = 297.47 (M+1, 100).

**Note:** The separation of **2s** and **2t** by prep HPLC was not successful. So, it was not possible to assign the peaks in the mixtures as the difference between **2s** and **2t** is the phenyl substitution at the 3 and 5 position of thiadiazole ring. The <sup>1</sup>H-NMR and <sup>13</sup>C NMR clearly shows mixture of regioisomers.

HPLC ratio is 62.68:37.32 (~2:1)

#### References:

1. C. P. Pravin, S. B. Dinesh, S. D. Prasad, G. A. Krishnacharya, *Tetrahedron Lett.* 2009, 50, 5820–5822
2. C. Dong-Ping, C. Zhen-Chu, *Synth. Commun.* 2002, 32, 2155-2159
3. X. Yali, C. Jiuxi, G. Wenxia, J. Huile, D. Jinchang, W. Huayue, *J. Chem. Res.* 2010, 34, 151-153
4. a) S. M. Abdelrahman, M. Laura, P. K. Tamara, P. Eun-Jung, M. P. John, C. Mark, *Bioorg. Med. Chem.* 2012, 20, 510–520 b) L. Zhuo, S. H. Xie, H. Wang and Prof. H. J. Zhu, *Eur. J. Org. Chem.* 2021, 23, 3398-3402
5. S. Manik, A. P. Cameron, K. J. Stacey, G. B. Sophia, M. D. Katherine, F. B. Kyle, *J. Am. Chem. Soc.* 2025, 147, 10698–10705
6. Q. Huang, J. Liu, J. Wan, *Org. Lett.* 2024, 26, 5263–5268
7. Anais da Academia Brasileira de Ciencias (1963), 35(2), 197-201

**$^1\text{H}$  NMR spectrum (400 MHz) of Compound (2a) in  $\text{DMSO-}d_6$**

C5747-85

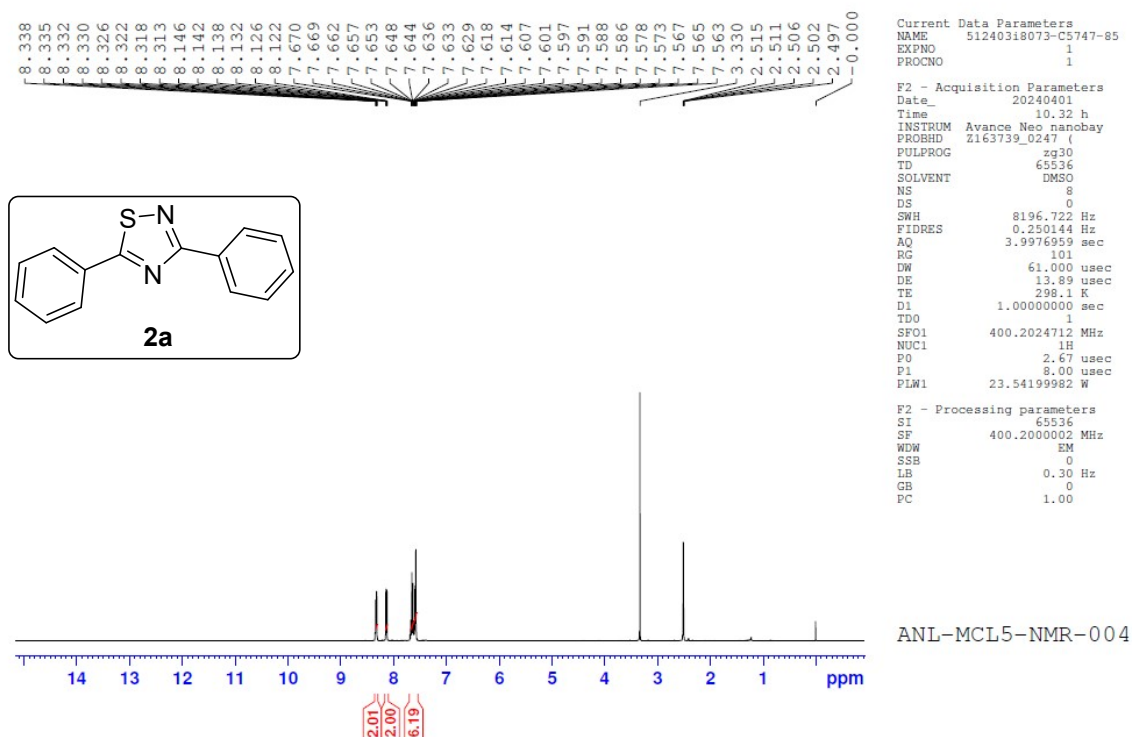

**$^{13}\text{C}$  NMR spectrum (100 MHz) of Compound (2a) in  $\text{DMSO-}d_6$**

C5747-85

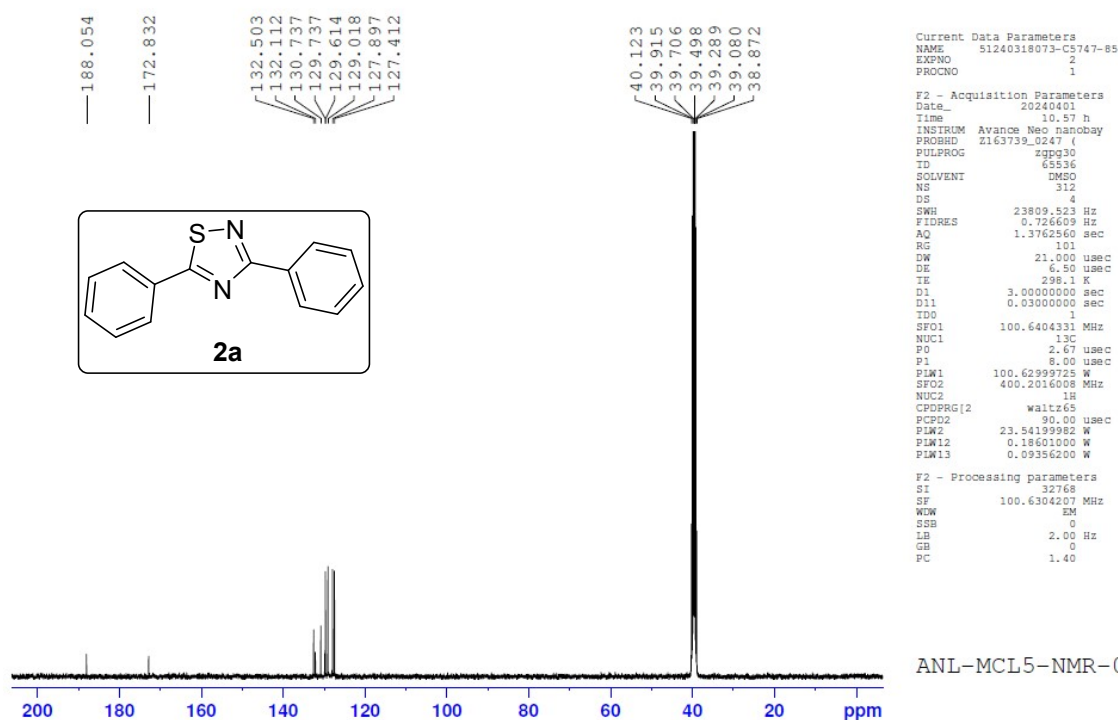

ANL-MCL5-NMR-004

LCMS spectrum of Compound (2a)





C5747-80

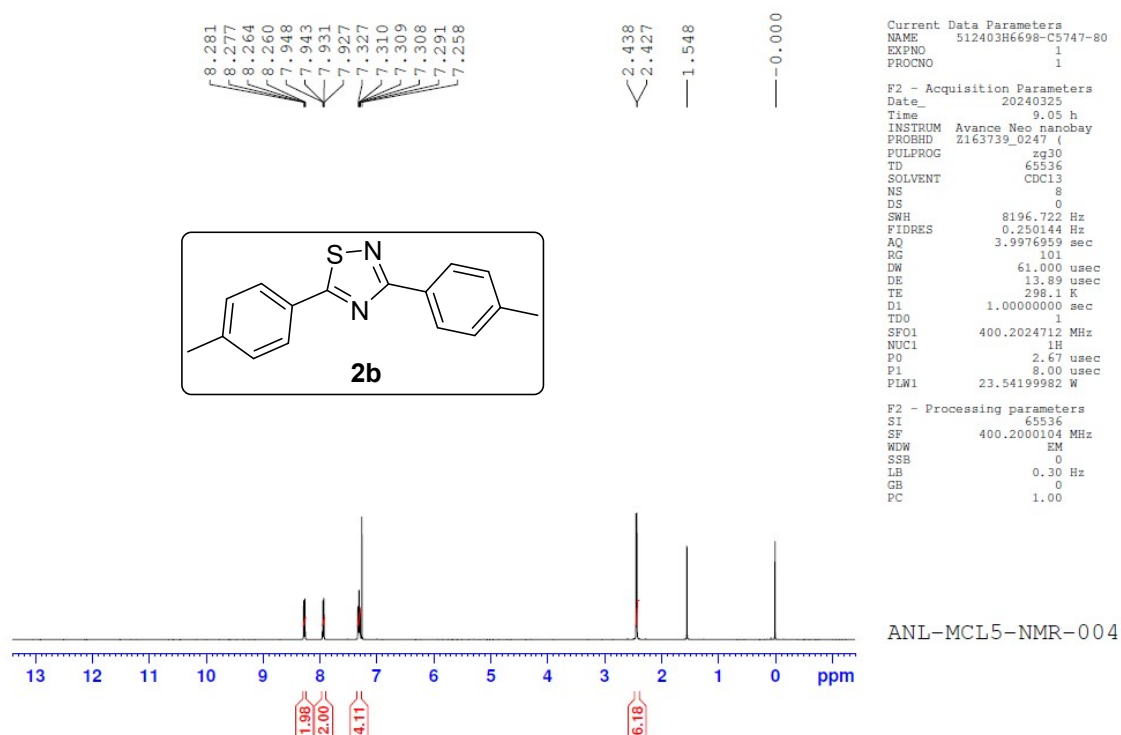**<sup>13</sup>C NMR spectrum (100 MHz) of Compound (2b) in DMSO-d<sub>6</sub>**

C5747-80

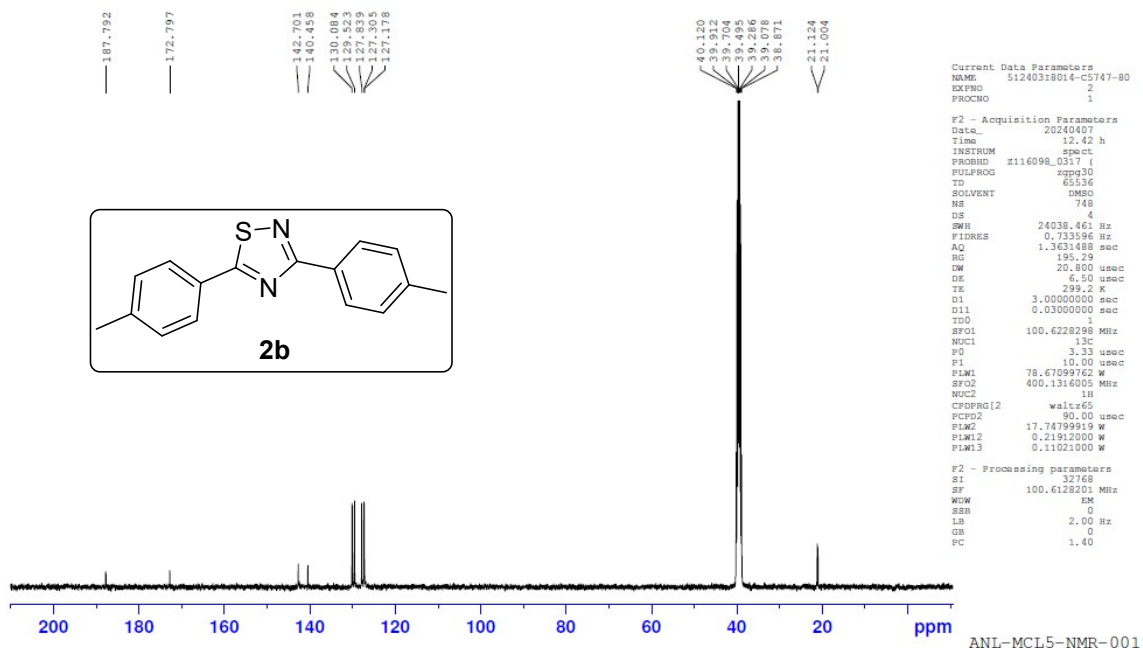**LCMS spectrum of Compound (2b)**

Aragen Life Sciences Private limited  
Discovery Chemistry – Analytical Services

Sample ID C5747-80  
Acq Method RND\_FA\_3MIN-  
1:B,2  
512403H6697

Instrument ID ANL-MCL5-LCMS-007  
Date of Analysis 25-Mar-2024 10:30:19

| Time | Area          | Area% |
|------|---------------|-------|
| 0.24 | 13308403.04   | 0.30  |
| 0.33 | 32580591.06   | 0.73  |
| 0.52 | 80568849.25   | 1.79  |
| 0.63 | 7536771.91    | 0.16  |
| 0.66 | 8755452.84    | 0.20  |
| 1.10 | 3581675.00    | 0.08  |
| 1.70 | 4335964705.69 | 96.74 |

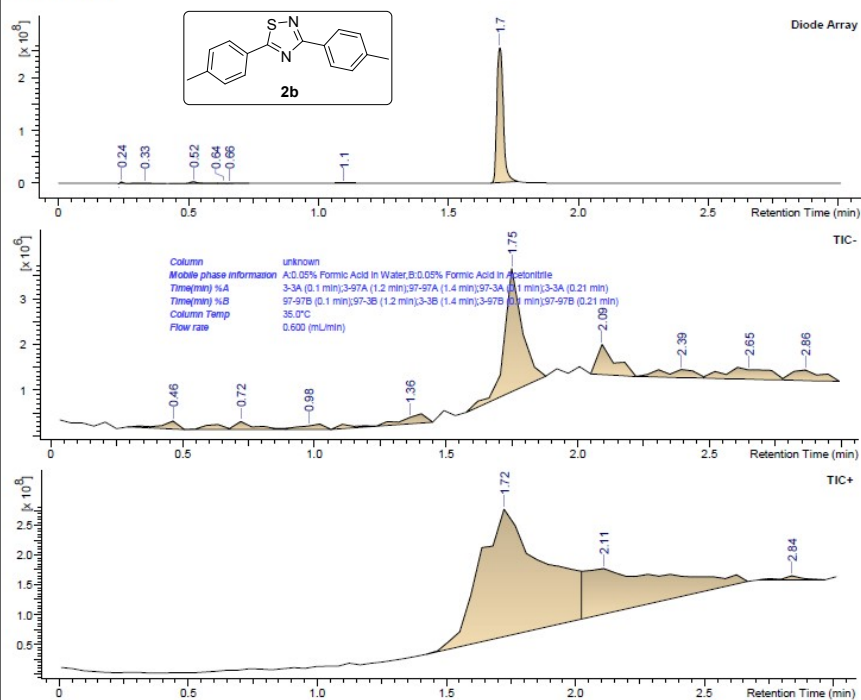

Aragen Life Sciences Private limited  
Discovery Chemistry – Analytical Services

Sample ID C5747-80  
Acq Method RND\_FA\_3MIN-  
1:B,2  
512403H6697

Instrument ID ANL-MCL5-LCMS-007  
Date of Analysis 25-Mar-2024 10:30:19

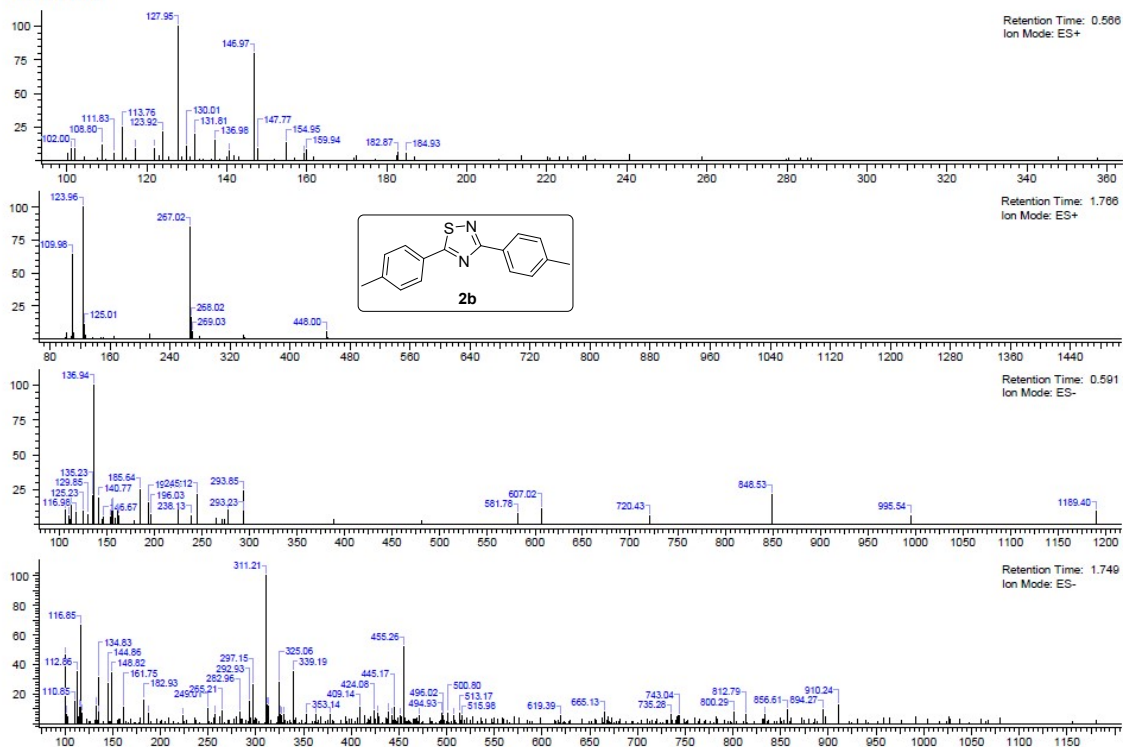

# <sup>1</sup>H NMR spectrum (400 MHz) of Compound (2c) in CDCl<sub>3</sub>-d<sub>6</sub>

C5747-84

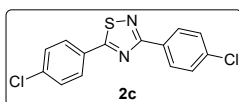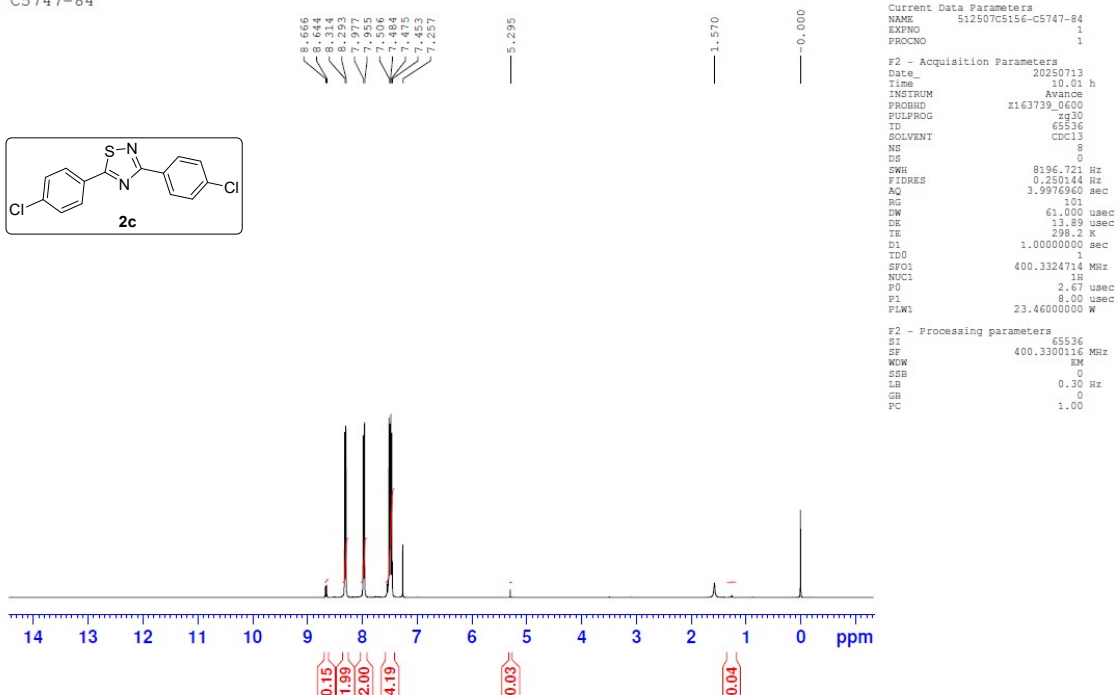

C5747-84

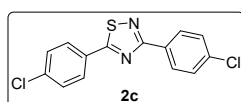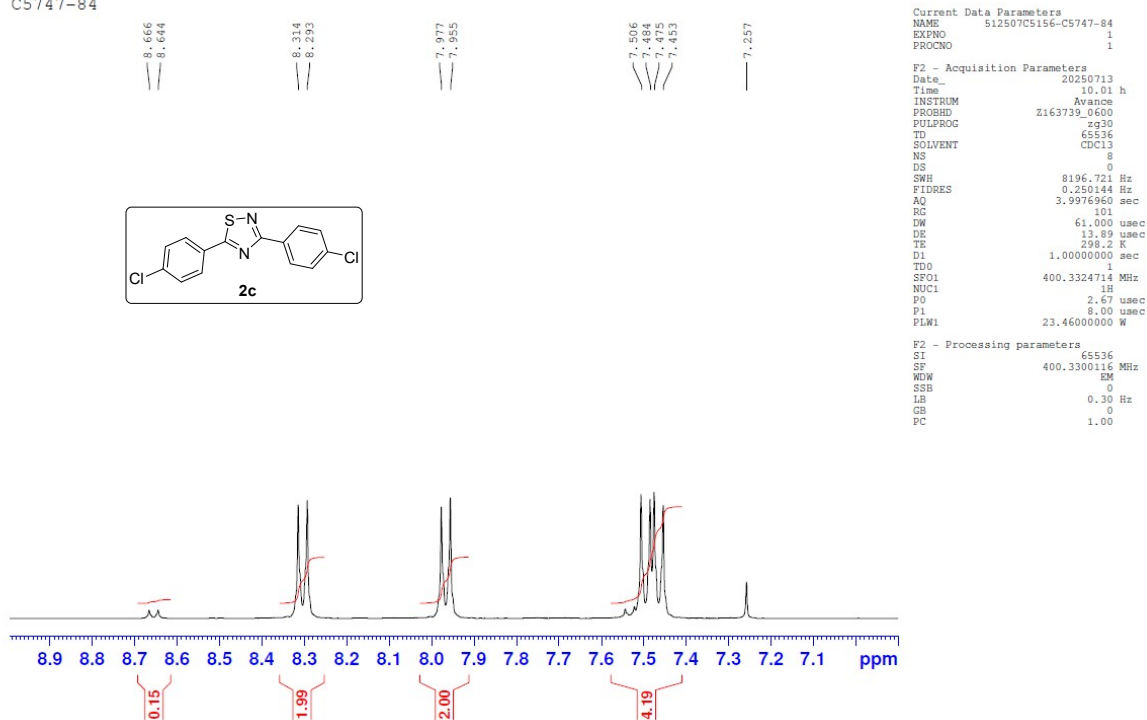

# <sup>13</sup>C NMR spectrum (100 MHz) of Compound (2c) in DMSO-d<sub>6</sub>

C5747-84

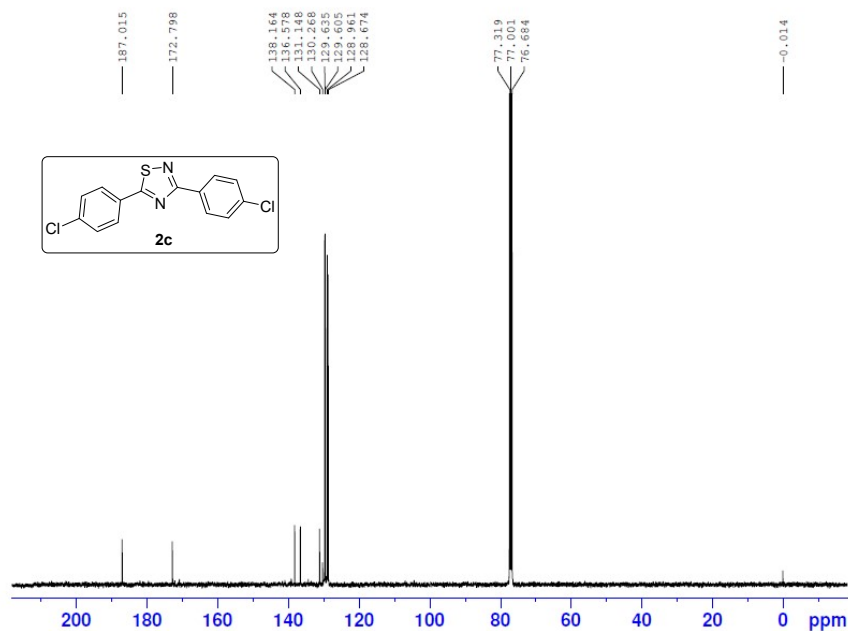

Current Data Parameters  
NAME 512507C5156-C5747-84  
EXPNO 2  
PROCNO 1

F2 - Acquisition Parameters  
Date\_ 20250713  
Time 11.03 h  
INSTRUM Avance  
PROBHD Z163739\_0600  
PULPROG zgpg30  
TD 65536  
SOLVENT CDCl3  
NS 1024  
DS 4  
SWH 23809.524 Hz  
FIDRES 0.726609 Hz  
AQ 1.3762560 sec  
RG 101  
DW 21.000 usec  
DE 6.50 usec  
TE 298.2 K  
D1 2.00000000 sec  
D11 0.03000000 sec  
TD0 1  
SFO1 100.6731249 MHz  
NUC1 13C  
P0 2.67 usec  
P1 8.00 usec  
PLW1 98.76400000 W  
SFO2 400.3316013 MHz  
NUC2 1H  
CPDPRG2 waltz65  
PCPD2 90.00 usec  
PLW2 23.46000000 W  
PLW12 0.18537000 W  
PLW13 0.09323800 W

F2 - Processing parameters  
SI 32768  
SF 100.6630617 MHz  
WDW EM  
SSB 0  
LB 2.00 Hz  
GB 0  
PC 1.40

C5747-84

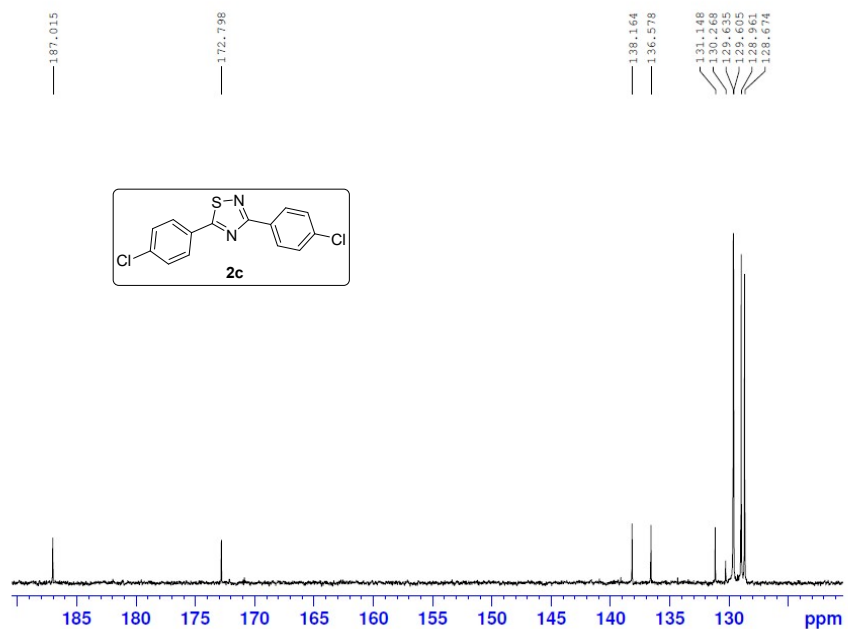

Current Data Parameters  
NAME 512507C5156-C5747-84  
EXPNO 2  
PROCNO 1

F2 - Acquisition Parameters  
Date\_ 20250713  
Time 11.03 h  
INSTRUM Avance  
PROBHD Z163739\_0600  
PULPROG zgpg30  
TD 65536  
SOLVENT CDCl3  
NS 1024  
DS 4  
SWH 23809.524 Hz  
FIDRES 0.726609 Hz  
AQ 1.3762560 sec  
RG 101  
DW 21.000 usec  
DE 6.50 usec  
TE 298.2 K  
D1 2.00000000 sec  
D11 0.03000000 sec  
TD0 1  
SFO1 100.6731249 MHz  
NUC1 13C  
P0 2.67 usec  
P1 8.00 usec  
PLW1 98.76400000 W  
SFO2 400.3316013 MHz  
NUC2 1H  
CPDPRG2 waltz65  
PCPD2 90.00 usec  
PLW2 23.46000000 W  
PLW12 0.18537000 W  
PLW13 0.09323800 W

F2 - Processing parameters  
SI 32768  
SF 100.6630617 MHz  
WDW EM  
SSB 0  
LB 2.00 Hz  
GB 0  
PC 1.40

## LCMS spectrum of Compound (2c)

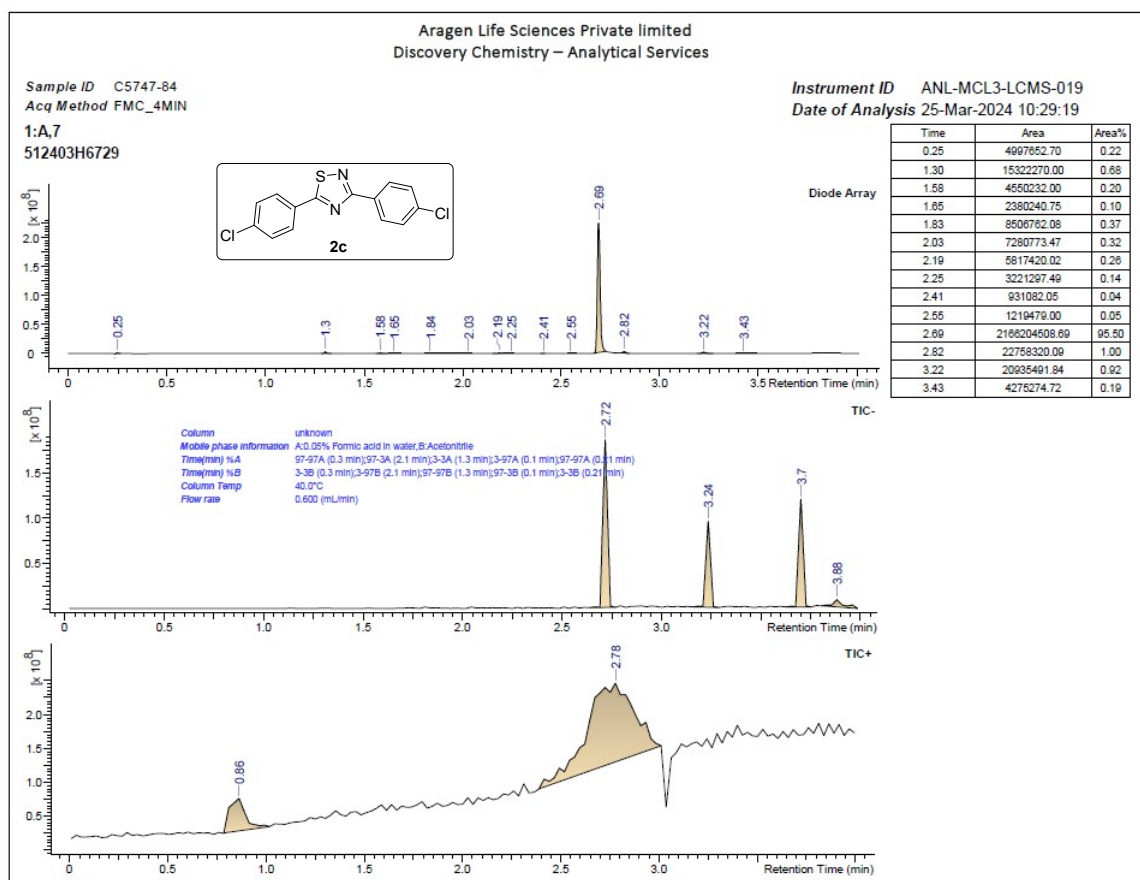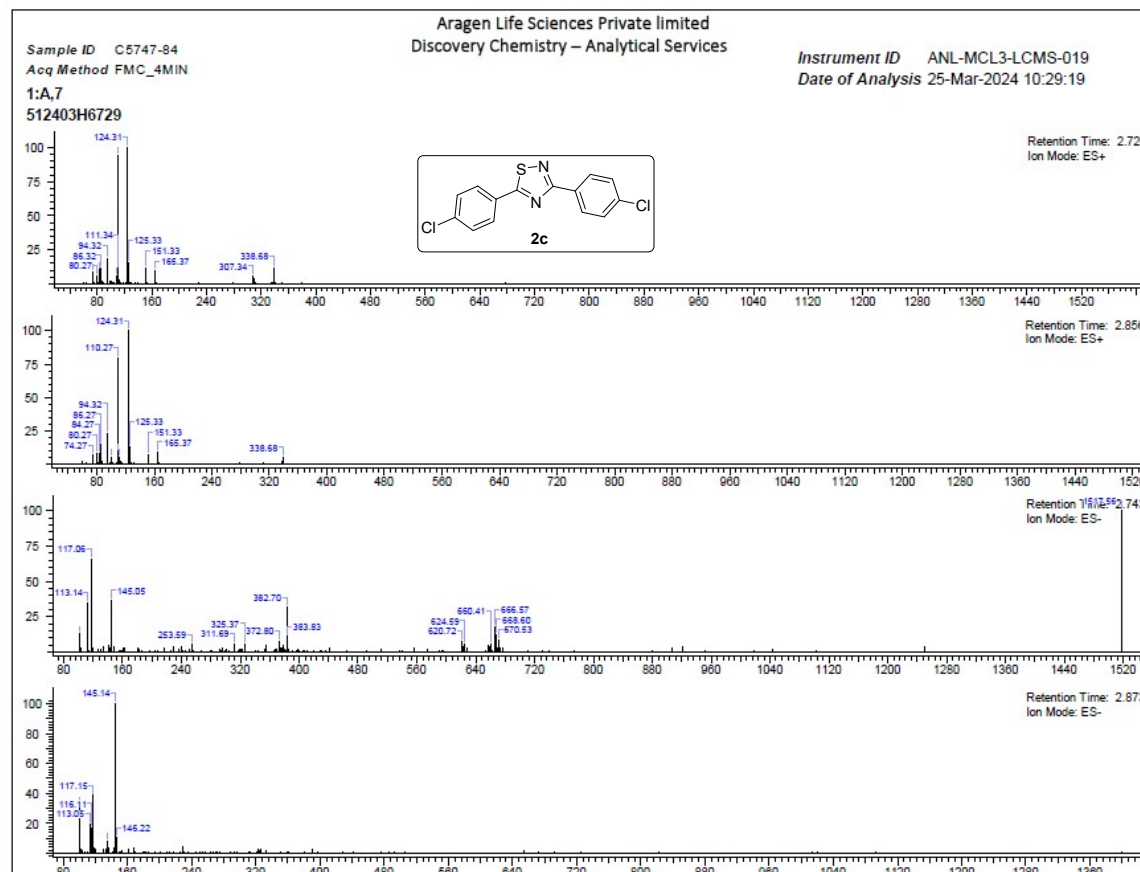

# **<sup>1</sup>H NMR spectrum (500 MHz) of Compound (2d) in DMSO-d<sub>6</sub>**

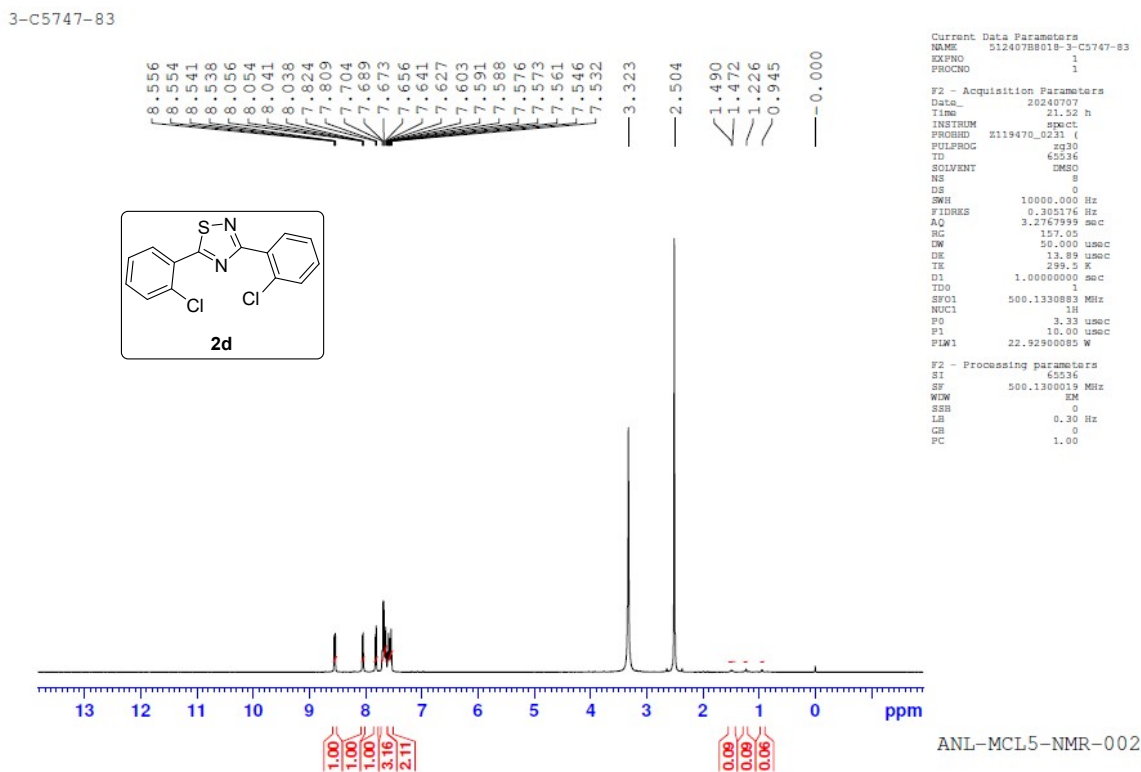

# **<sup>13</sup>C NMR spectrum (125 MHz) of Compound (2d) in DMSO-d<sub>6</sub>**

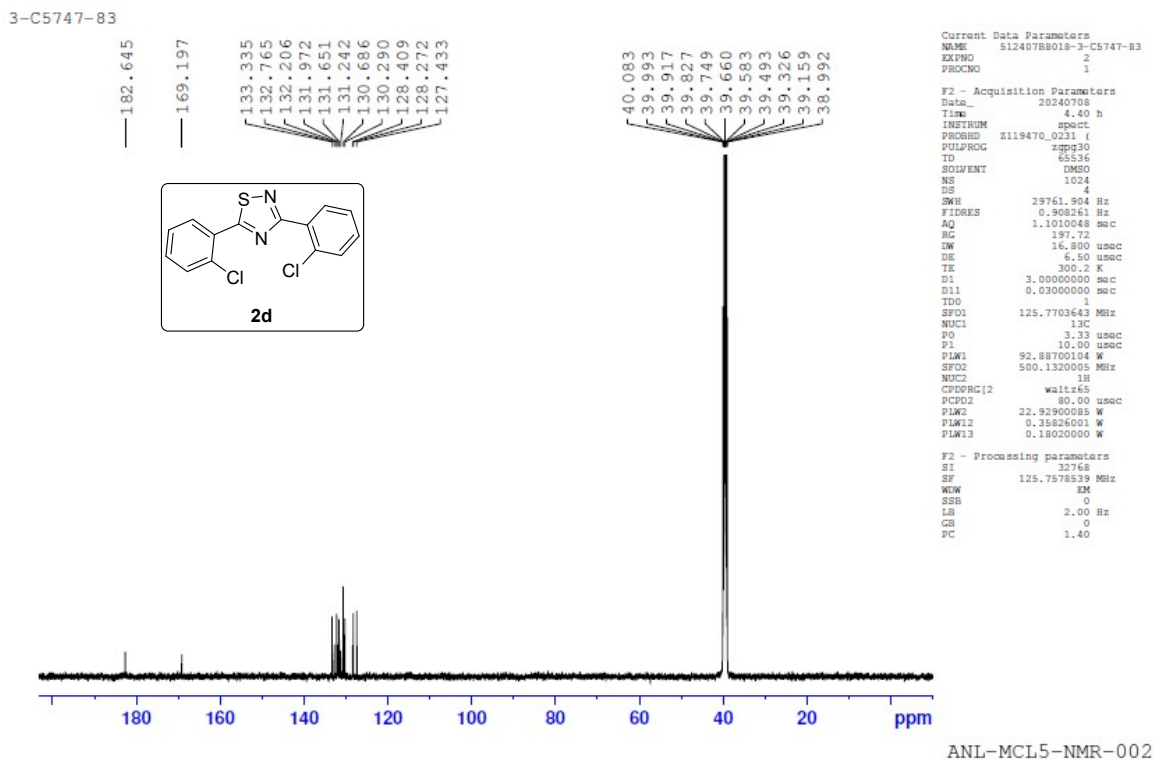



# LCMS spectrum of Compound (2d)

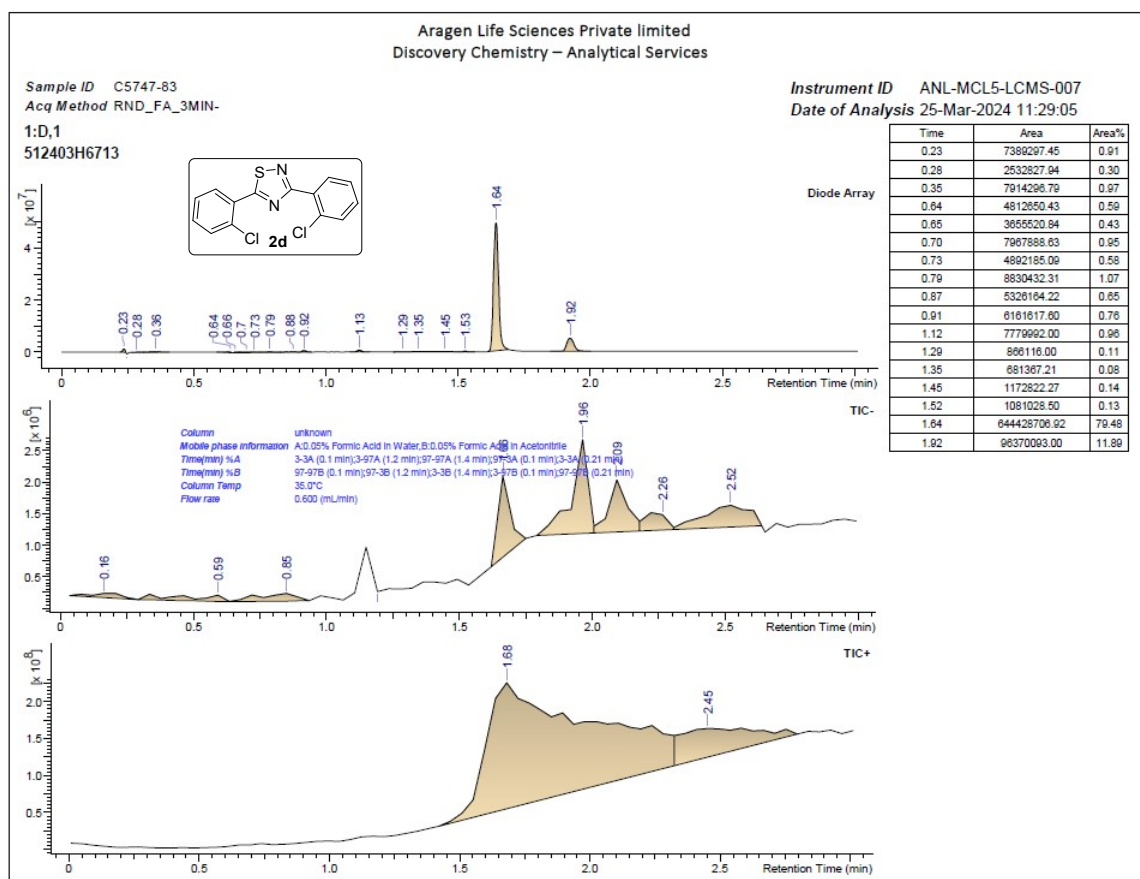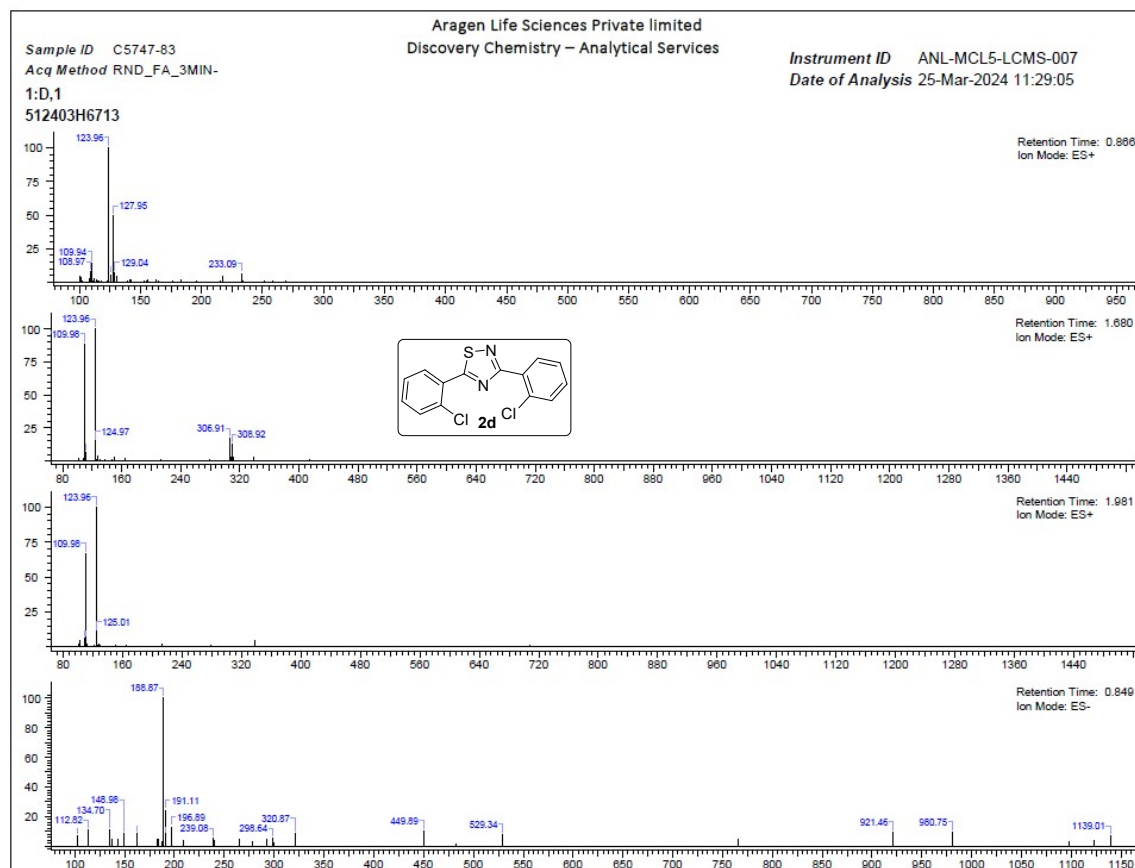

# **<sup>1</sup>H NMR spectrum (500 MHz) of Compound (2e) in DMSO-d<sub>6</sub>**

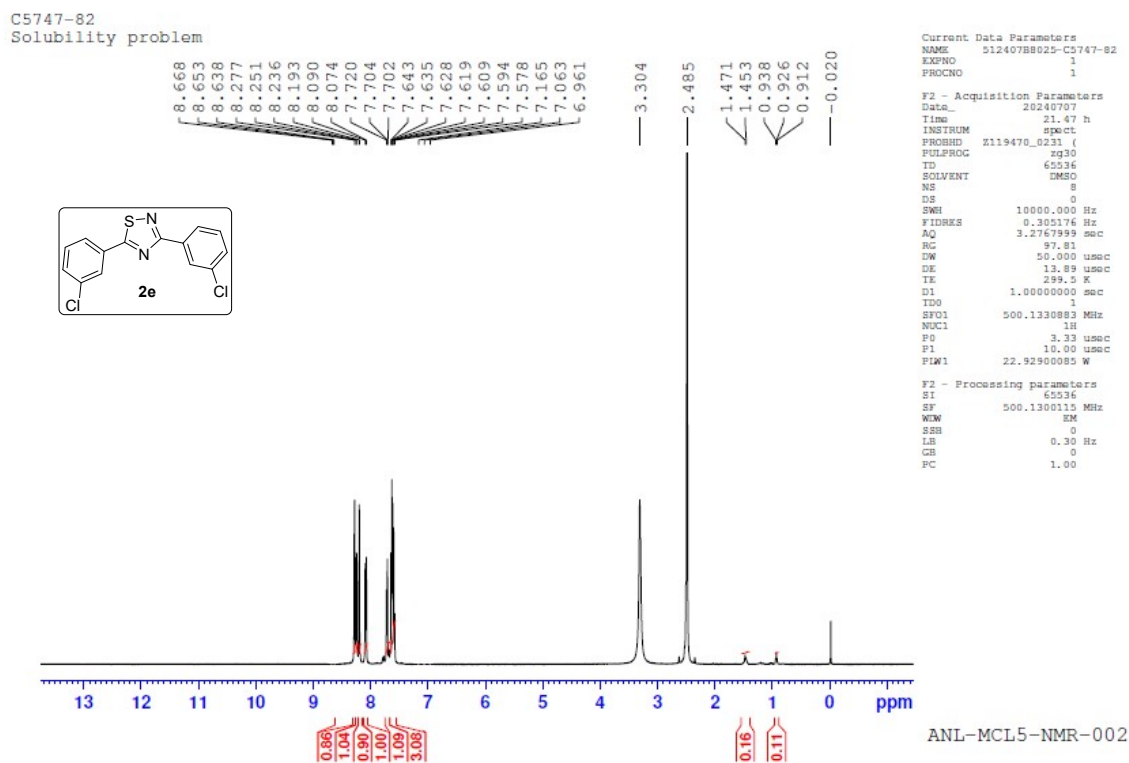

# **<sup>13</sup>C NMR spectrum (100 MHz) of Compound (2e) in DMSO-d<sub>6</sub>**

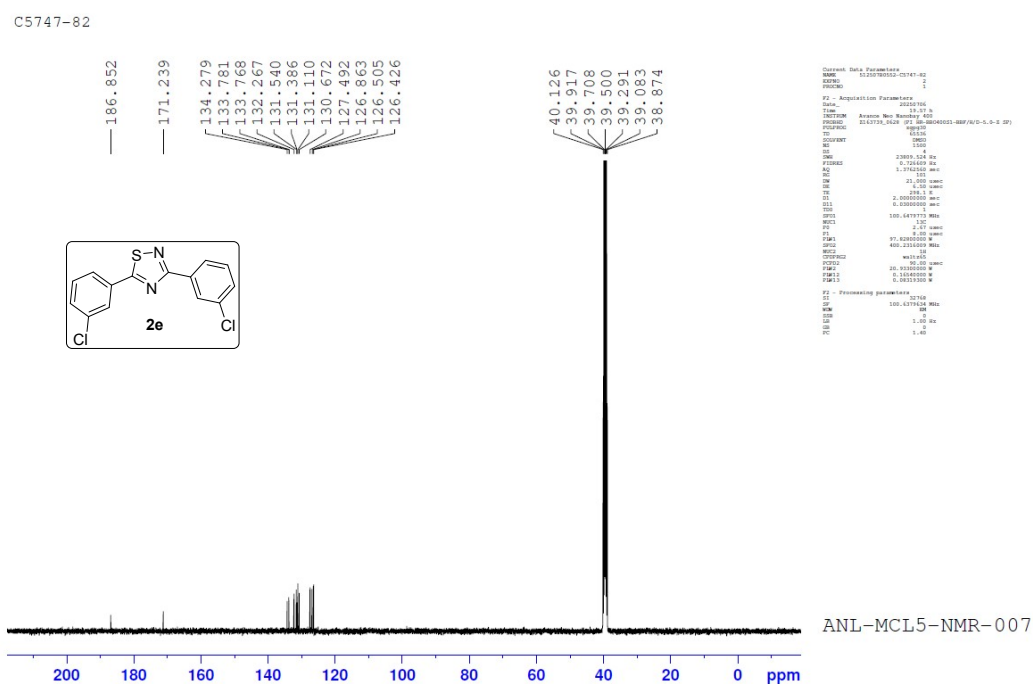



# <sup>13</sup>C NMR spectrum (100 MHz) of Compound (2e) in DMSO-*d*<sub>6</sub>Expansion

C5747-82

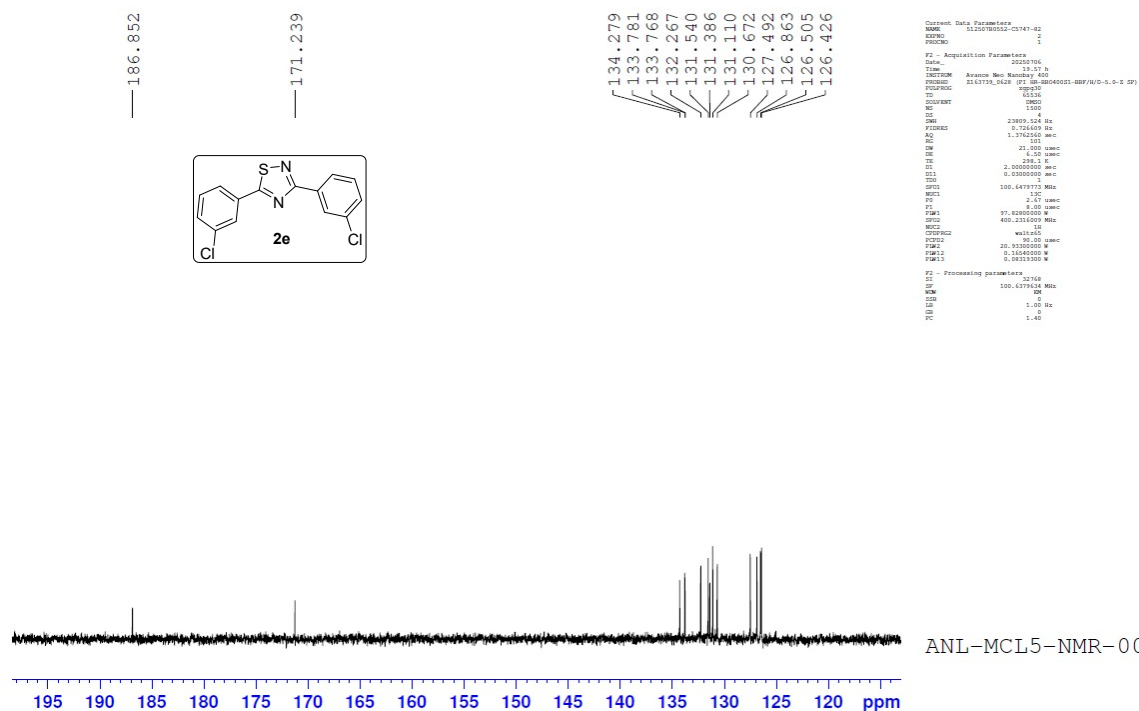

# LCMS spectrum of Compound (2e)

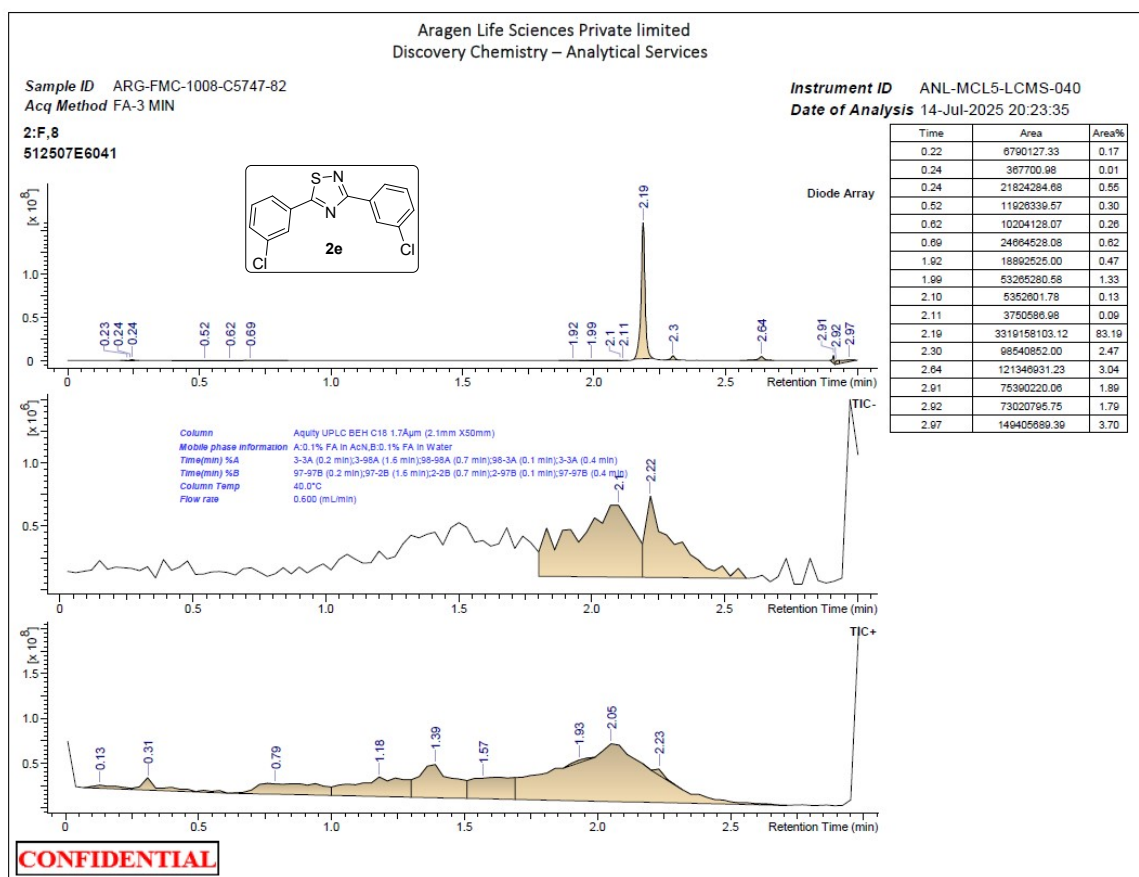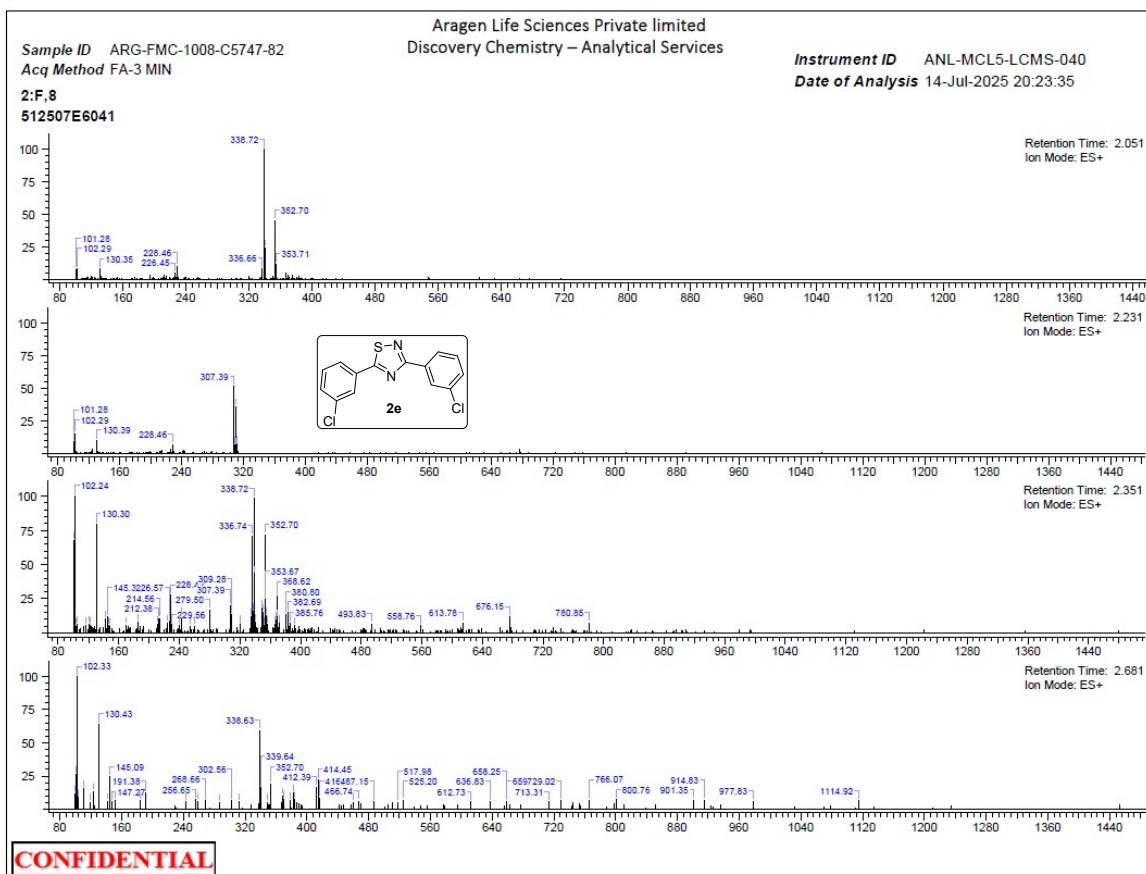

**<sup>1</sup>H NMR spectrum (400 MHz) of Compound (2f) in CDCl<sub>3</sub>**

C5747-81

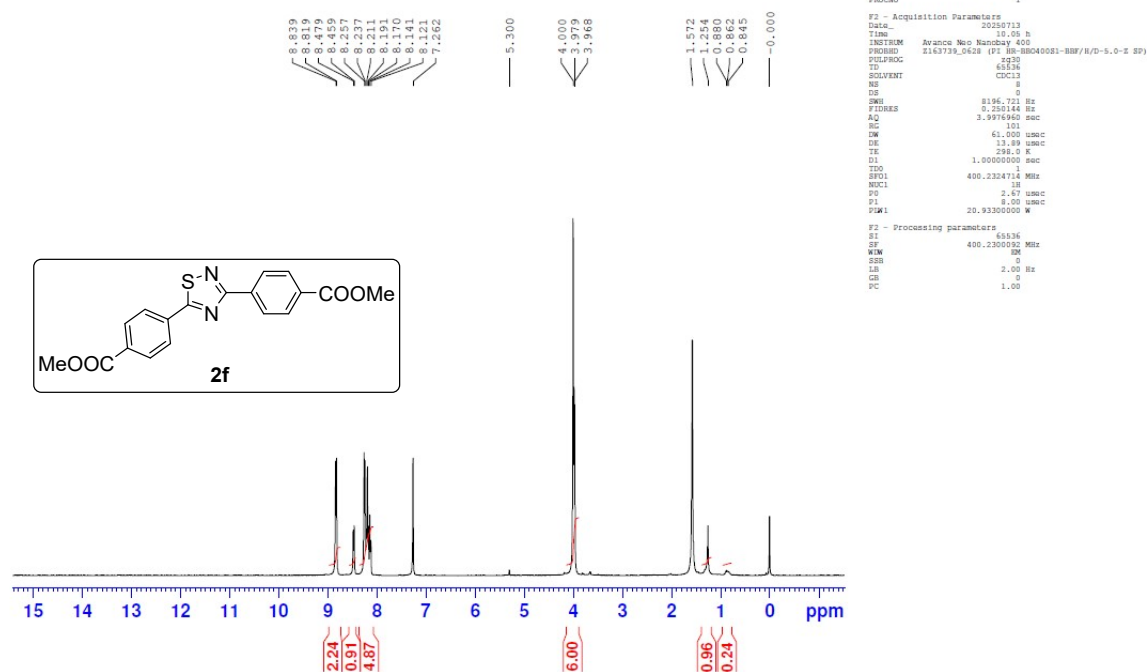

**CONFIDENTIAL**

ANL-MCL5-NMR-007

**<sup>13</sup>C NMR spectrum (100 MHz) of Compound (2f) in CDCl<sub>3</sub>**

C5747-81

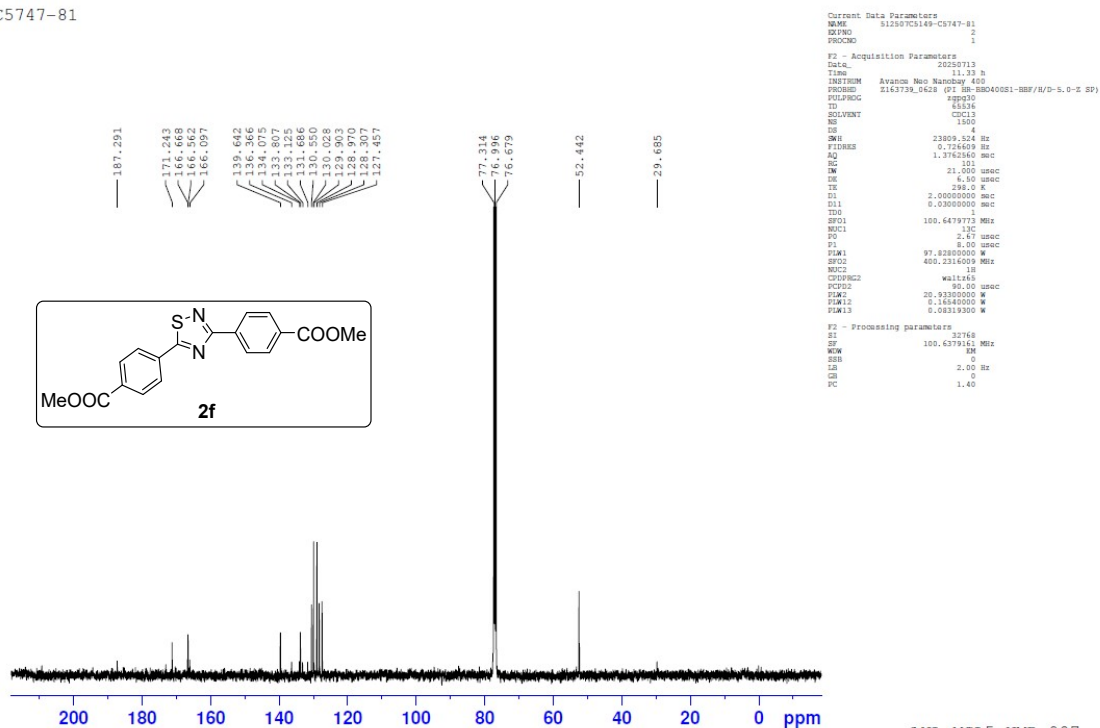

**CONFIDENTIAL**

ANL-MCL5-NMR-007

C5747-81

187.291

171.243

166.658

166.582

166.037

139.642

136.366

134.075

133.807

133.607

131.686

130.550

130.028

129.903

128.970

127.377

127.427

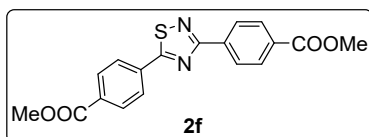

```
Current Data Parameters
NAME: 512507C5149-C5747-81
EXPNO: 2
PROCNO: 1

F2 - Acquisition Parameters
Date_: 20200713
Time: 11.33 h
INSTRUM: Avance Neo NanoBey 400
PROBHD: 5147393_0428 (P1 5B-BBQ400S1-BBE/S/D-5.0-2 SF)
PULPROG: zgpg30
TD: 65536
SOLVENT: CDCl3
NS: 1500
DS: 4
SWH: 23809.324 Hz
FIDRES: 0.726509 Hz
AQ: 1.3762560 sec
RG: 101
IN: 21.000 usec
DE: 6.50
TE: 298.0 K
C1: 2.00000000 sec
C11: 0.03000000 sec
TDS: 1
SFO1: 100.6479773 MHz
NUC1: 13C
PC: 2.67 usec
P1: 8.00 usec
P1M1: 97.82800000 W
SFO2: 400.2216009 MHz
NUC2: 1H
C12PRG2: waltz16
PCPD2: 90.00 usec
P1M2: 20.93300000 W
P1M12: 0.16360000 W
P1M13: 0.08319300 W

F2 - Processing parameters
SI: 32768
SF: 100.6379161 MHz
WDW: RM
SSB: 0
LB: 2.00 Hz
GB: 0
CB: 1.40
```

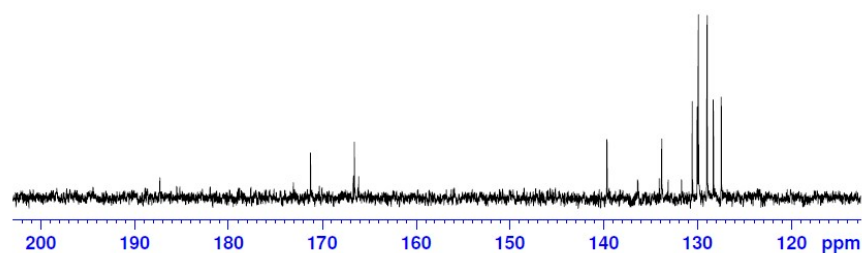

ANL-MCL5-NMR-007

CONFIDENTIAL

# LCMS spectrum of Compound (2f)

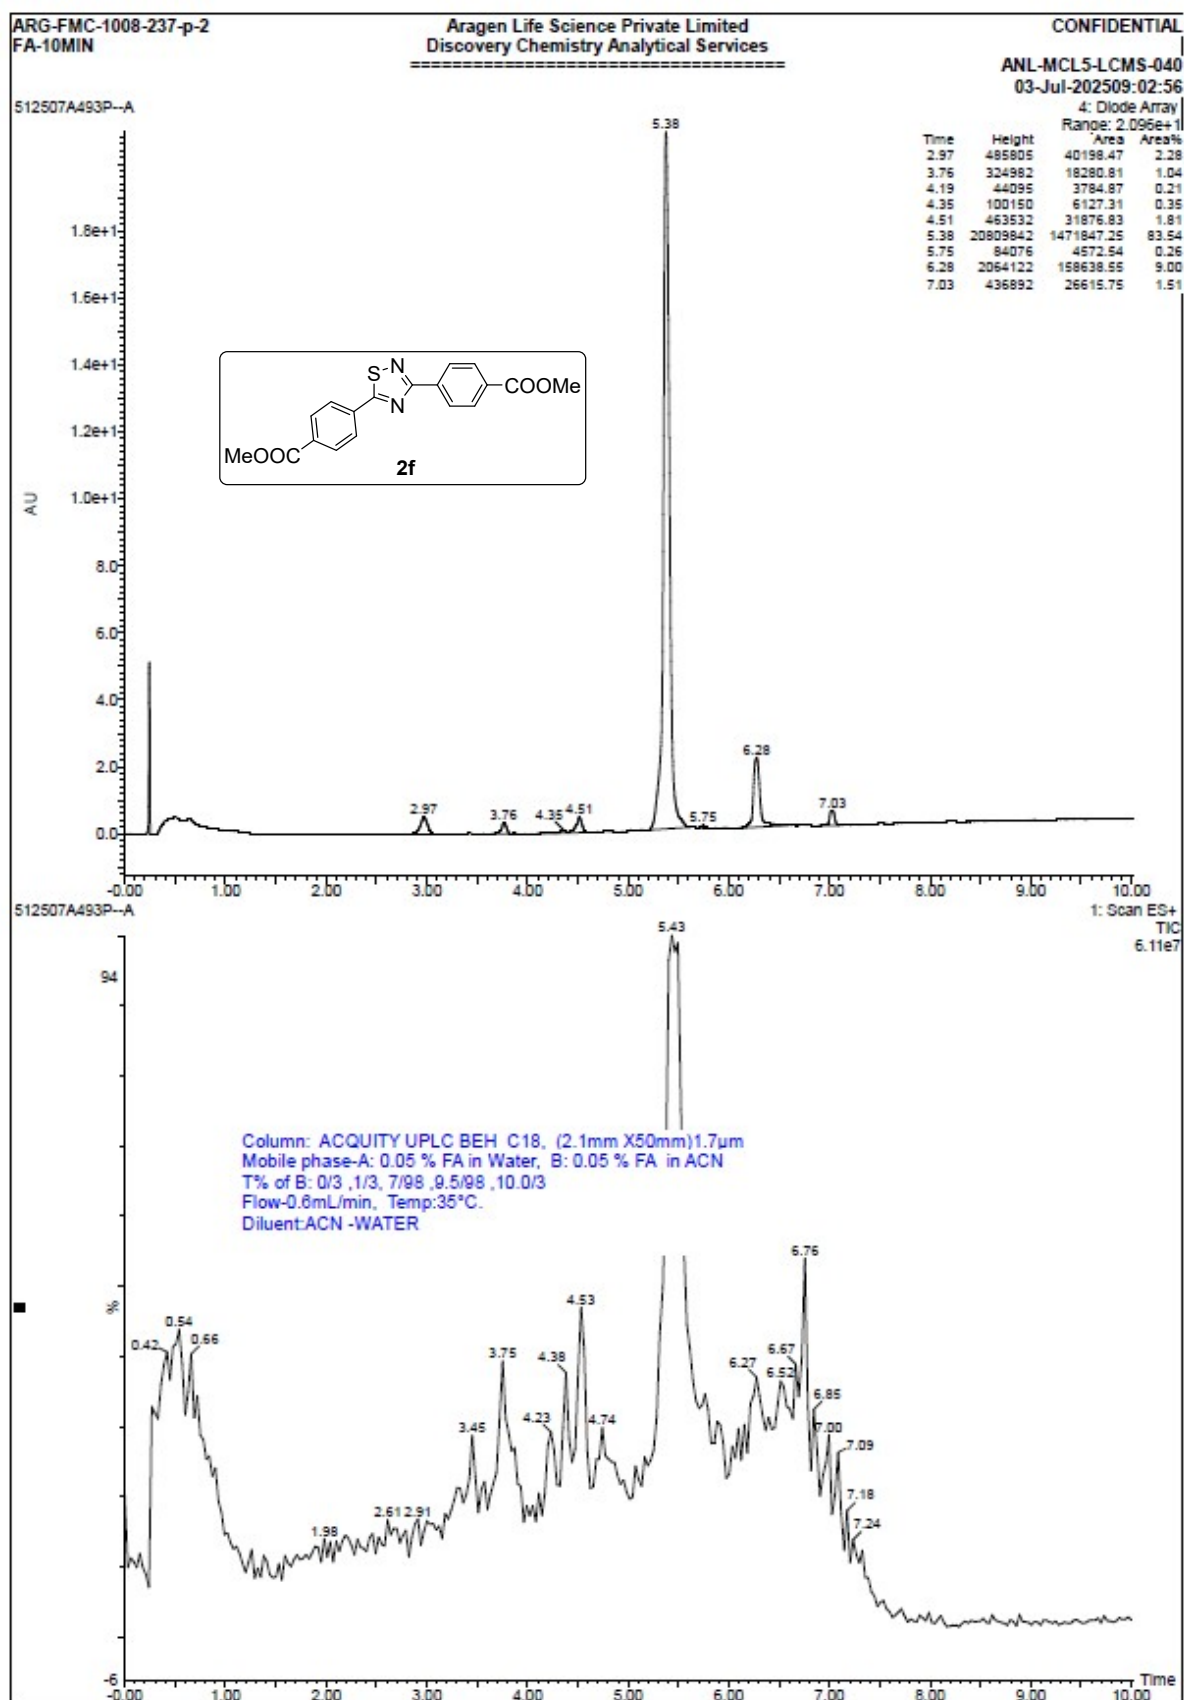

ANL-MCL5-LCMS-040

03-Jul-2025 09:02:56

1: Scan ES+

3.39e5

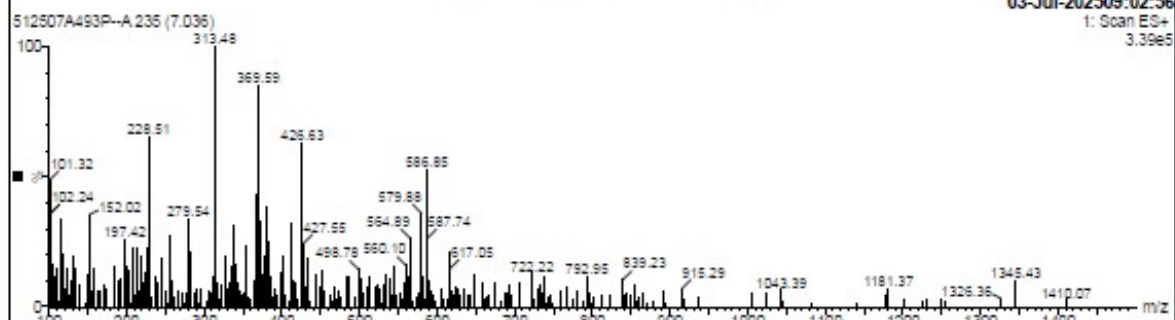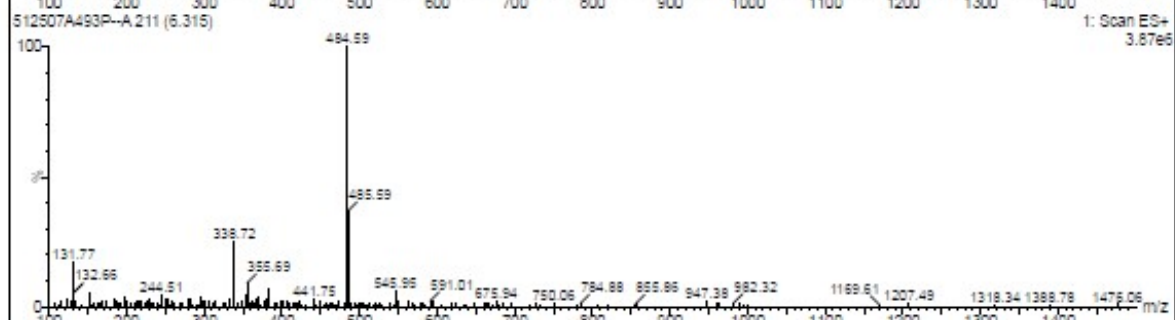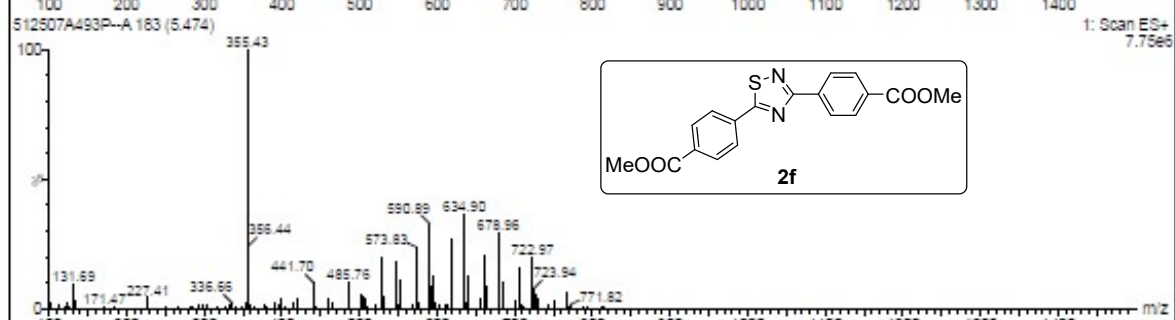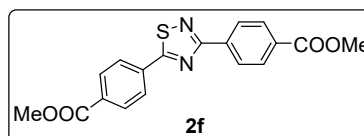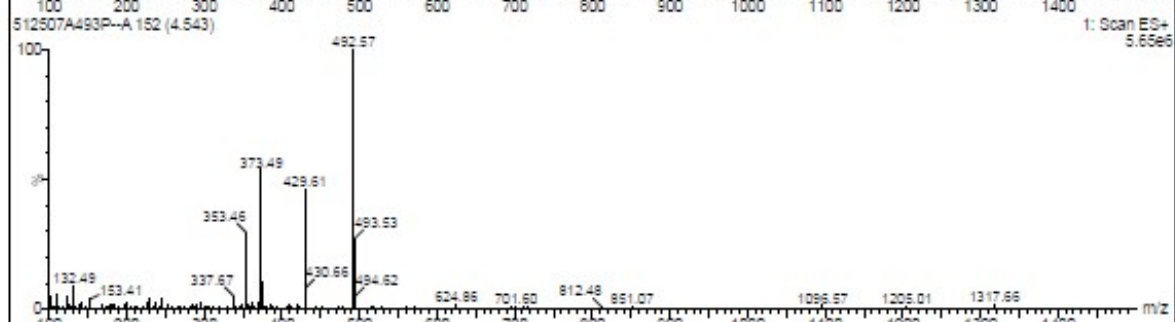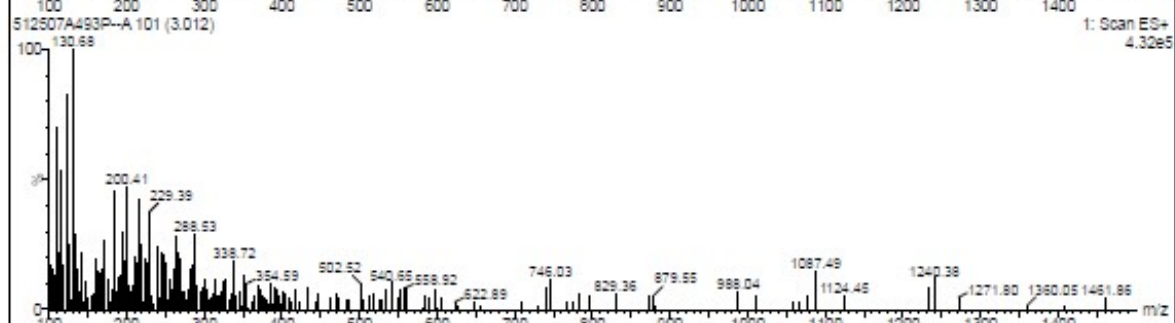

# <sup>1</sup>H NMR spectrum (400 MHz) of Compound (2g) in DMSO-*d*<sub>6</sub>

C5747-86

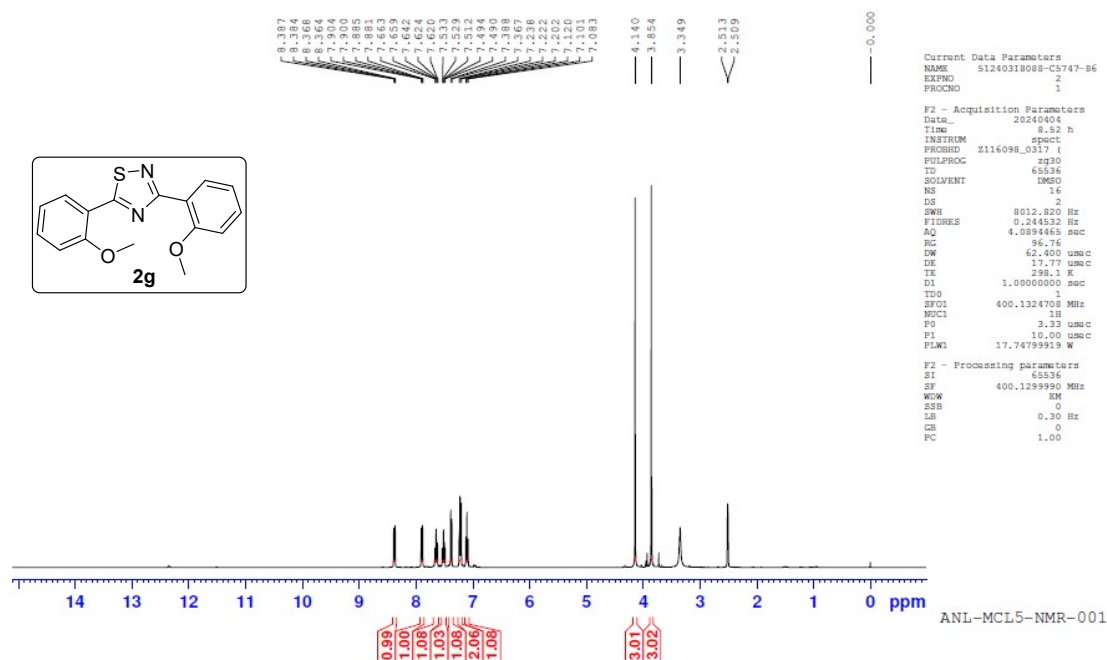

# <sup>1</sup>H NMR spectrum (400 MHz) of Compound (2g) in DMSO-*d*<sub>6</sub>-Expansion

C5747-86  
Solubility Problem

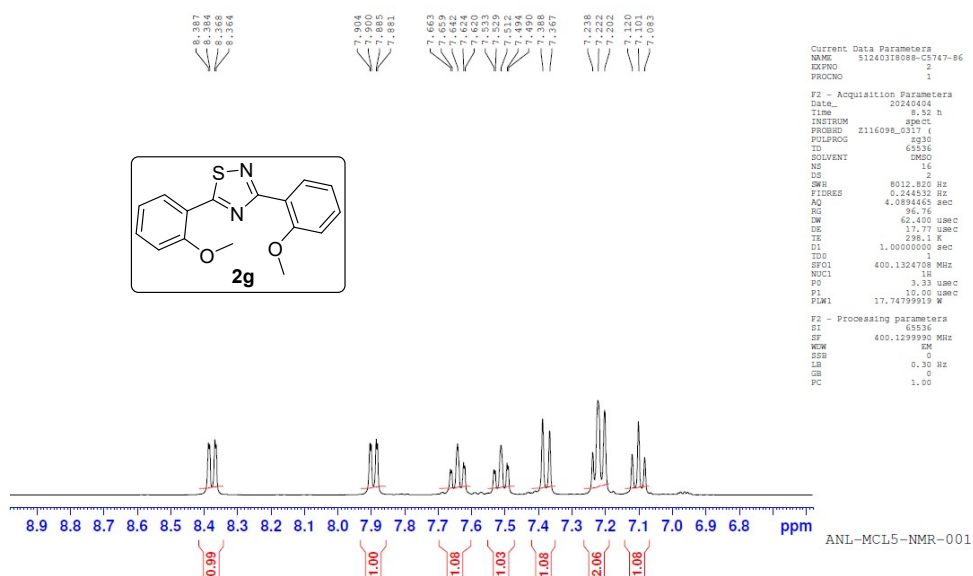



# <sup>13</sup>C NMR spectrum (100 MHz) of Compound (2g) in DMSO-*d*<sub>6</sub>

C5747-86

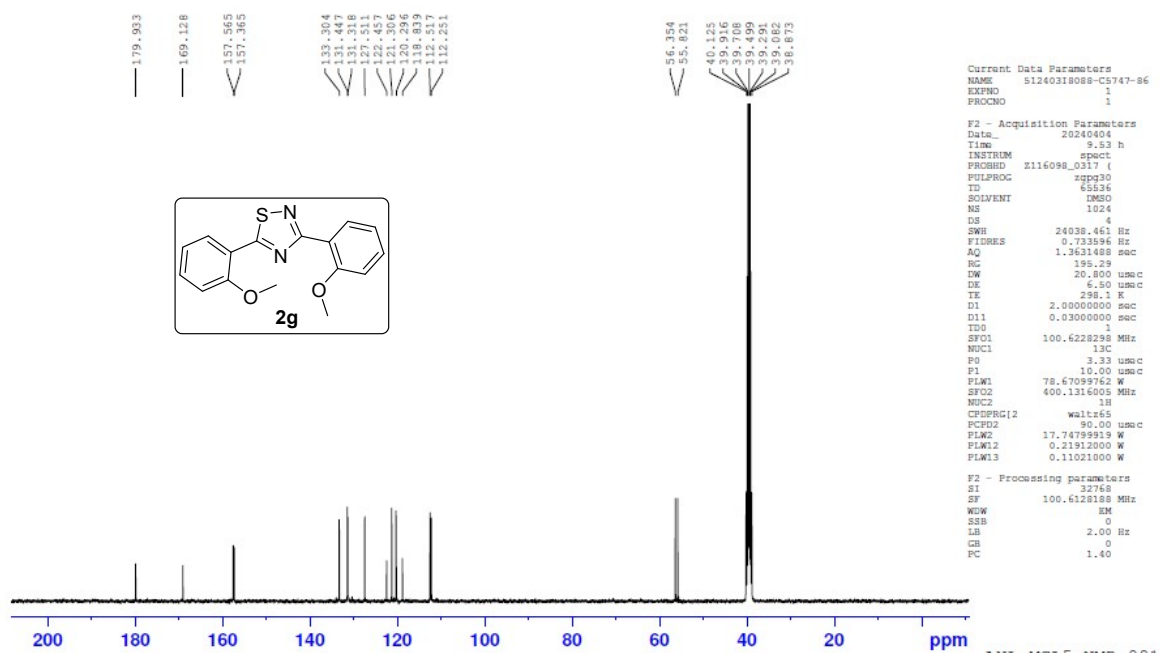



# LCMS spectrum of Compound (2g)

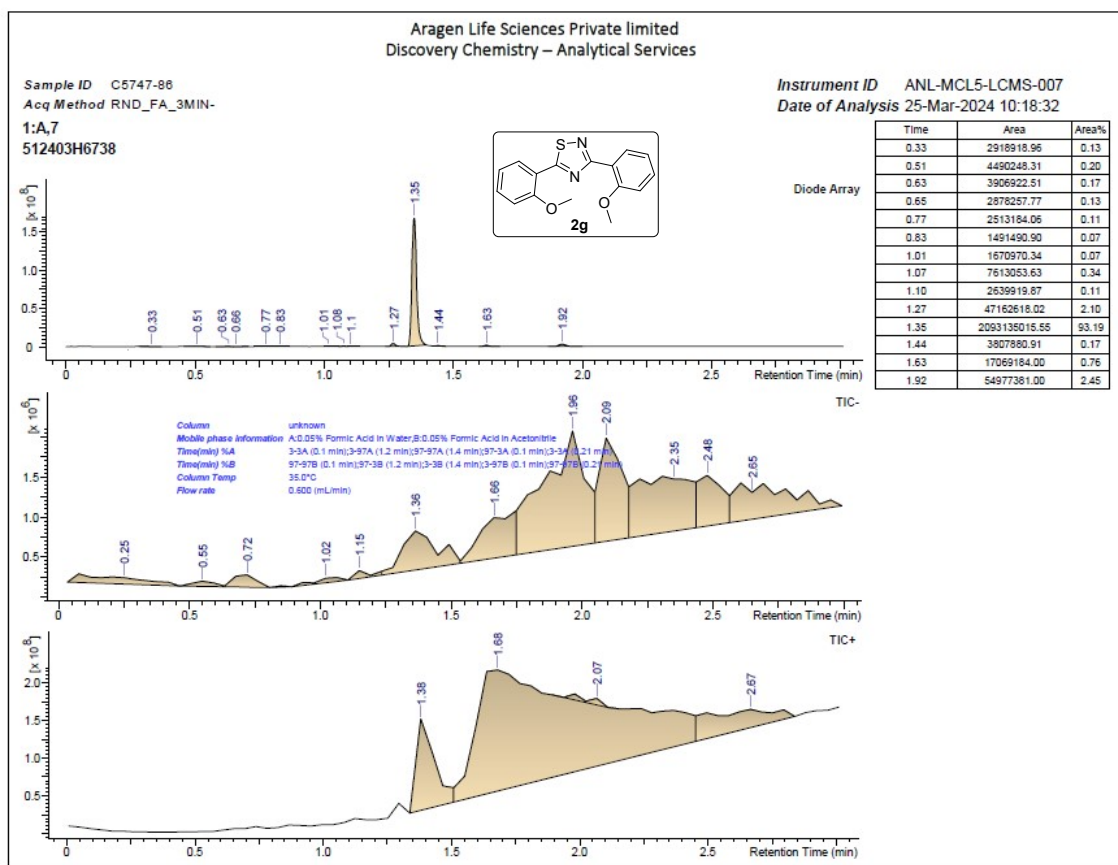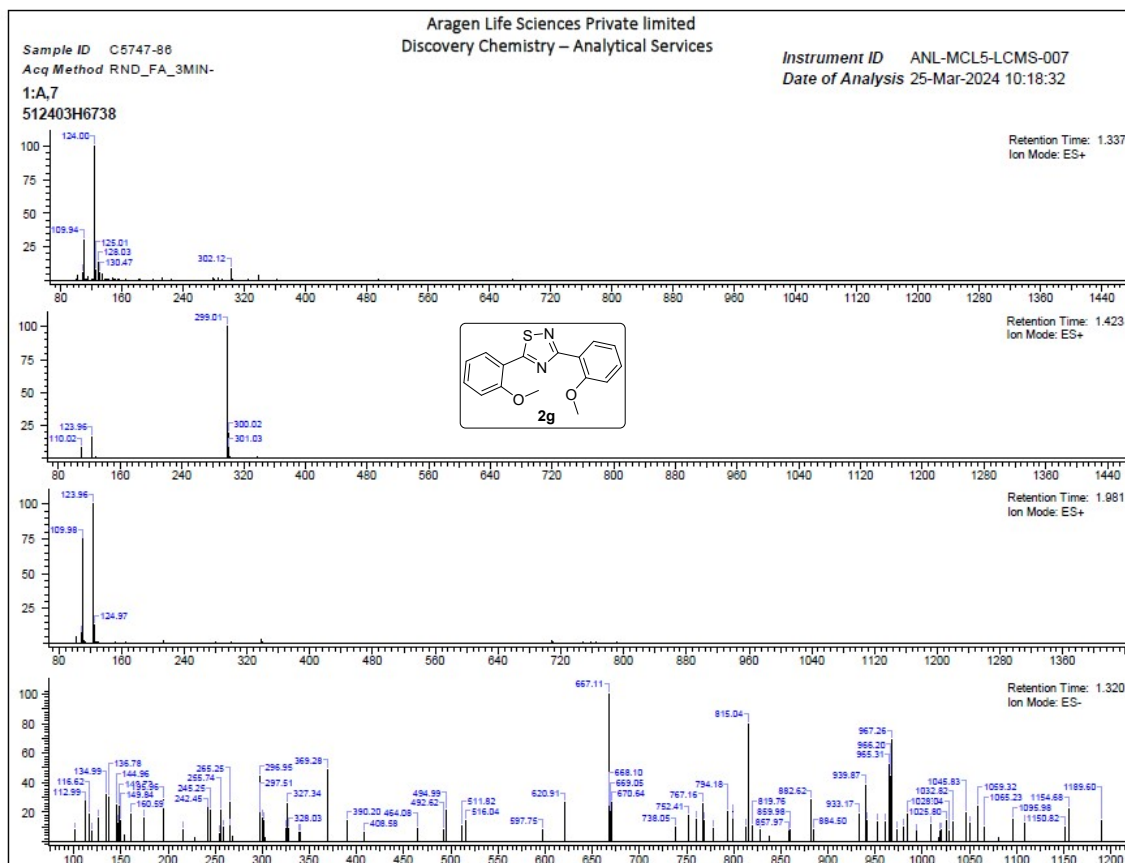

# <sup>1</sup>H NMR spectrum (500 MHz) of Compound (2h) in CDCl<sub>3</sub>

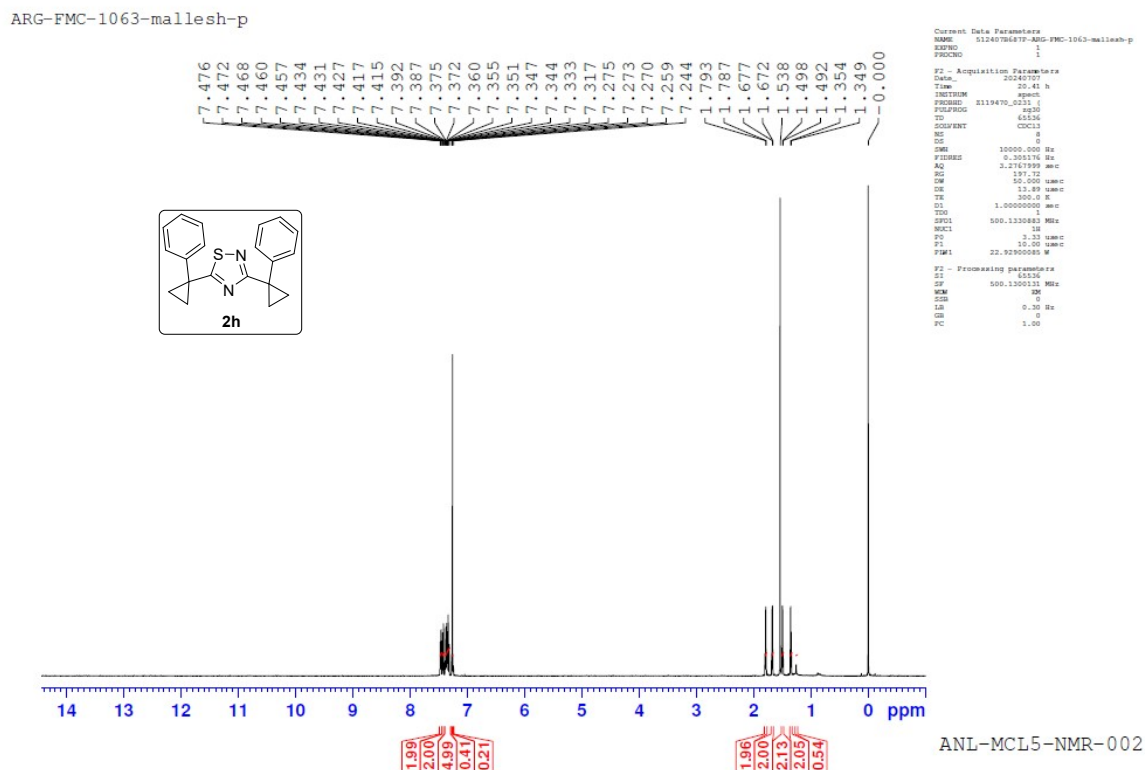

# <sup>1</sup>H NMR spectrum (500 MHz) of Compound (2h) in CDCl<sub>3</sub>-Expansion

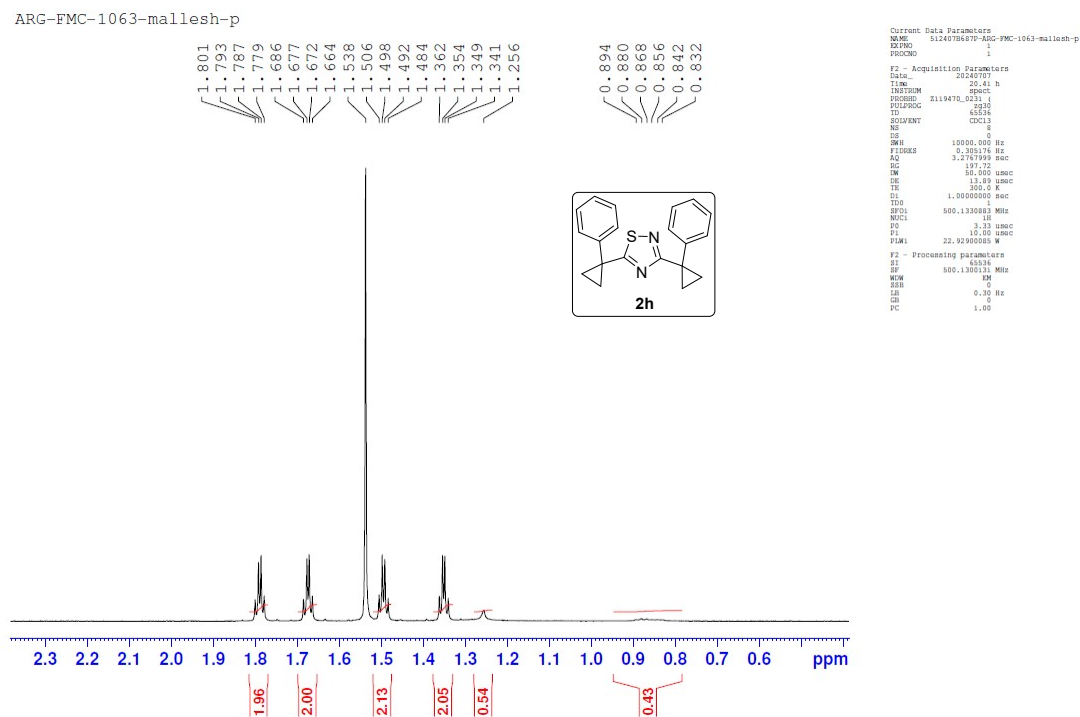

# <sup>13</sup>C NMR spectrum (100 MHz) of Compound (2h) in DMSO-*d*<sub>6</sub>

C5747-94

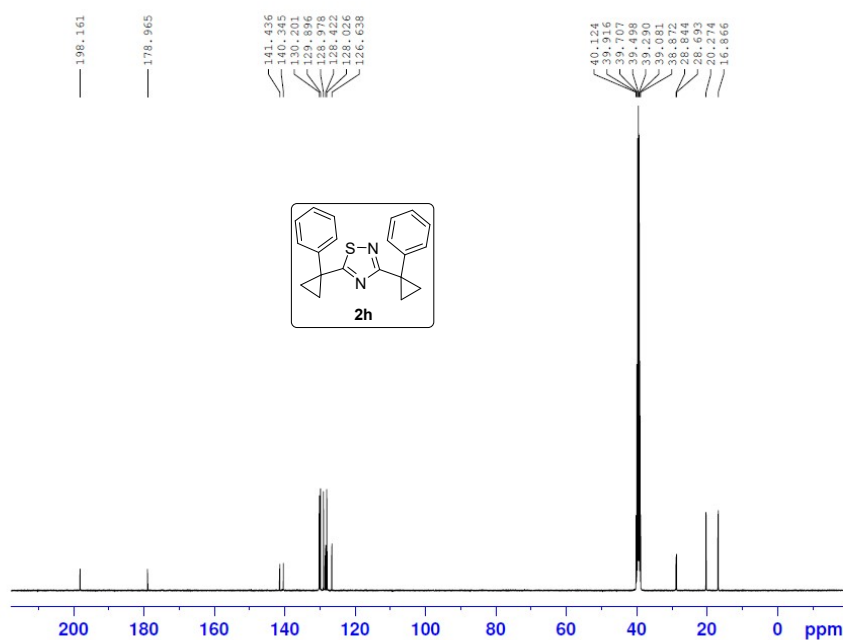

Current Data Parameters  
 NAME 512506B0566-C5747-94  
 EXPNO 2  
 PROCNO 1

F2 - Acquisition Parameters  
 Date\_ 20250706  
 Time 19.58 h  
 INSTRUM Avance Neo Nanobay  
 PROBHD Z163739\_0485 ( )  
 PULPROG zgpg30  
 TD 65536  
 SOLVENT DMSO  
 NS 2000  
 DS 4  
 SWH 23809.523 Hz  
 FIDRES 0.726609 Hz  
 AQ 1.3762560 sec  
 RG 71.8  
 DW 21.000 usec  
 DE 6.50 usec  
 TE 298.2 K  
 D1 2.00000000 sec  
 D11 0.03000000 sec  
 TD0 1  
 SFO1 100.6228298 MHz  
 NUC1 13C  
 P0 2.67 usec  
 P1 8.00 usec  
 PLW1 94.24700165 W  
 SFO2 400.1316005 MHz  
 NUC2 1H  
 CPDPRG[2] waltz65  
 PCPD2 90.00 usec  
 PLW2 23.84199905 W  
 PLW12 0.18838000 W  
 PLW13 0.09475400 W

F2 - Processing parameters  
 SI 32768  
 SF 100.6128200 MHz  
 WDW EM  
 SSB 0  
 LB 2.00 Hz  
 GB 0  
 PC 1.40

C5747-94

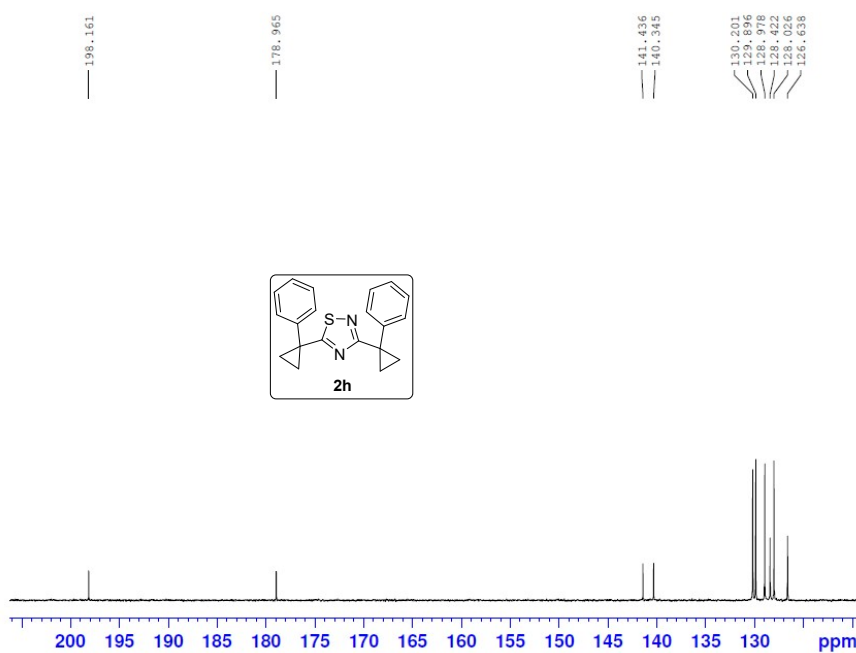

Current Data Parameters  
 NAME 512506B0566-C5747-94  
 EXPNO 2  
 PROCNO 1

F2 - Acquisition Parameters  
 Date\_ 20250706  
 Time 19.58 h  
 INSTRUM Avance Neo Nanobay  
 PROBHD Z163739\_0485 ( )  
 PULPROG zgpg30  
 TD 65536  
 SOLVENT DMSO  
 NS 2000  
 DS 4  
 SWH 23809.523 Hz  
 FIDRES 0.726609 Hz  
 AQ 1.3762560 sec  
 RG 71.8  
 DW 21.000 usec  
 DE 6.50 usec  
 TE 298.2 K  
 D1 2.00000000 sec  
 D11 0.03000000 sec  
 TD0 1  
 SFO1 100.6228298 MHz  
 NUC1 13C  
 P0 2.67 usec  
 P1 8.00 usec  
 PLW1 94.24700165 W  
 SFO2 400.1316005 MHz  
 NUC2 1H  
 CPDPRG[2] waltz65  
 PCPD2 90.00 usec  
 PLW2 23.84199905 W  
 PLW12 0.18838000 W  
 PLW13 0.09475400 W

F2 - Processing parameters  
 SI 32768  
 SF 100.6128200 MHz  
 WDW EM  
 SSB 0  
 LB 2.00 Hz  
 GB 0  
 PC 1.40

LCMS spectrum of Compound (2h)

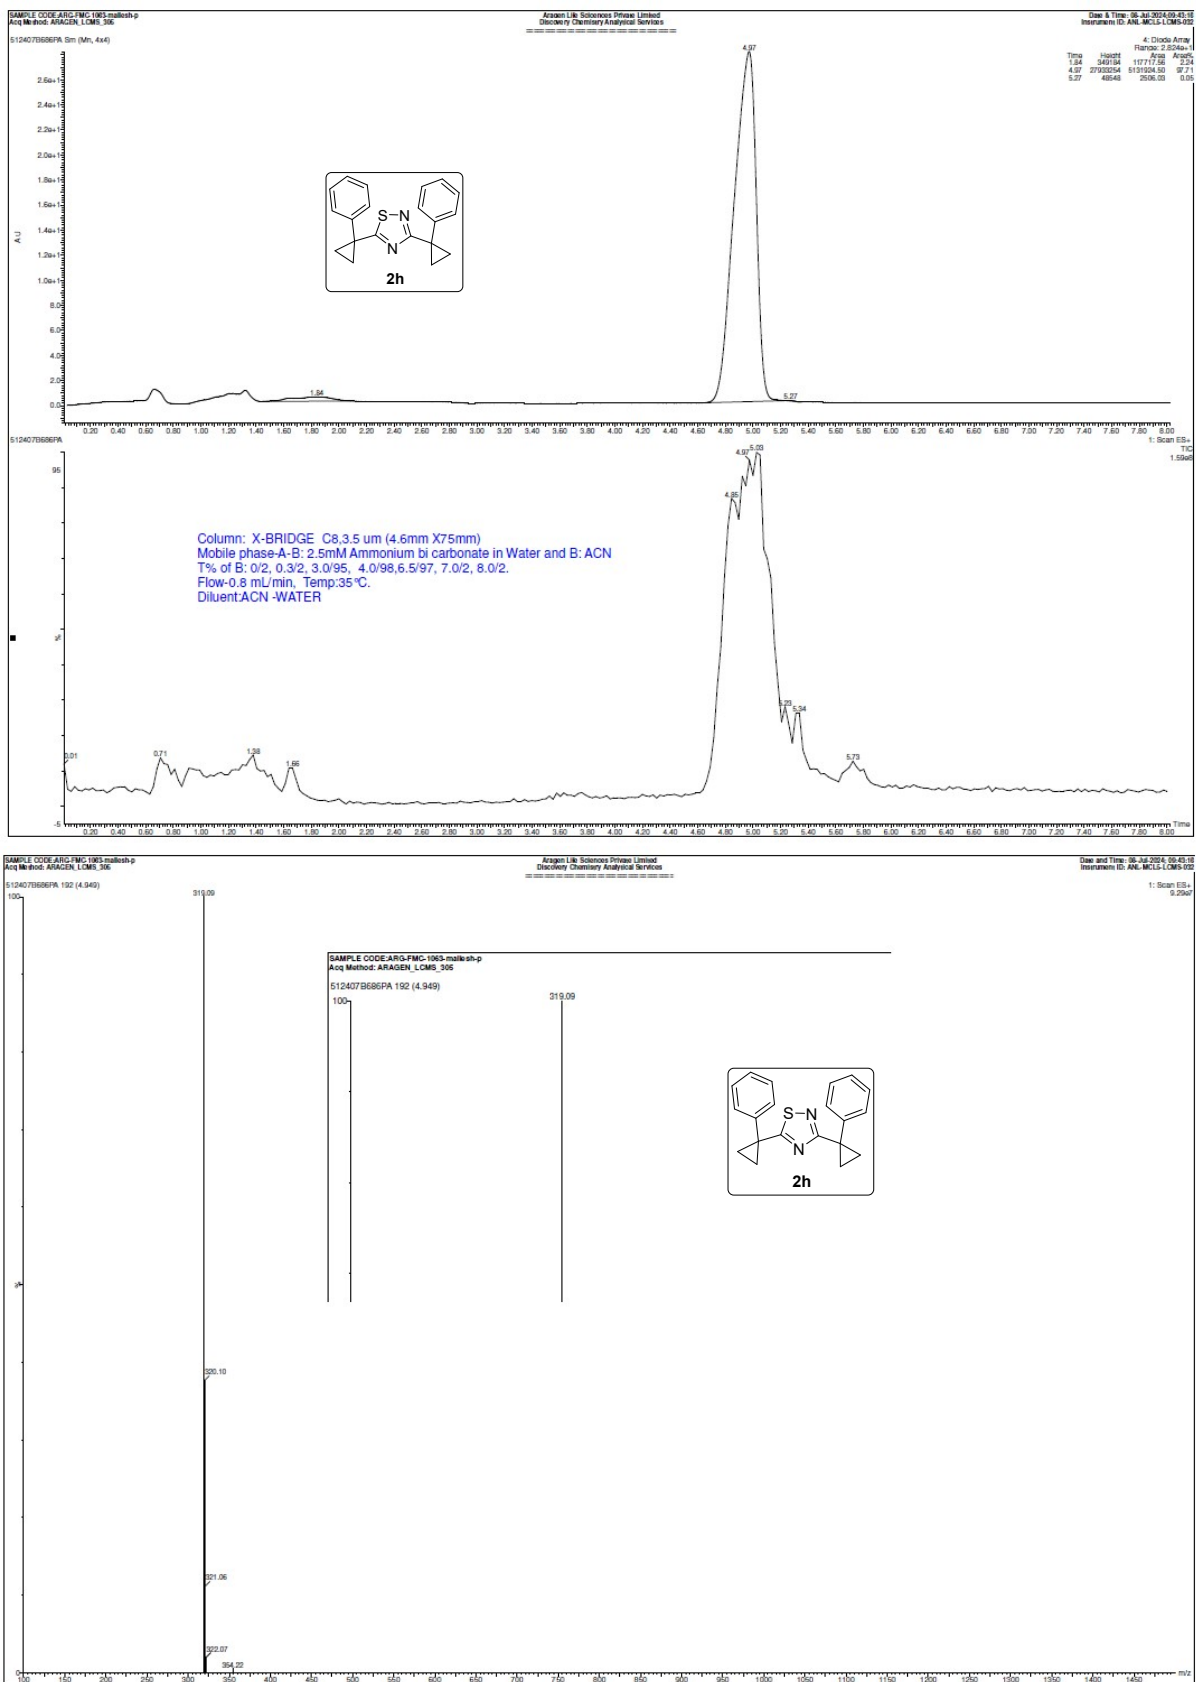

# <sup>1</sup>H NMR spectrum (400 MHz) of Compound (2i) in CDCl<sub>3</sub>

C5747-100

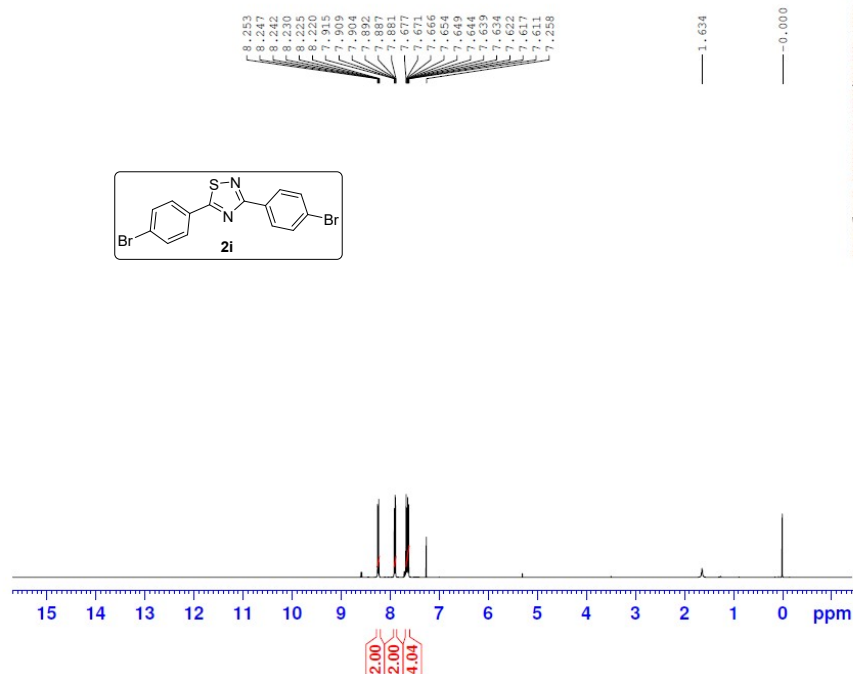

CONFIDENTIAL

ANL-MCL5-NMR-007

# <sup>13</sup>C NMR spectrum (100 MHz) of Compound (2i) in DMSO-d<sub>6</sub>

C5747-100

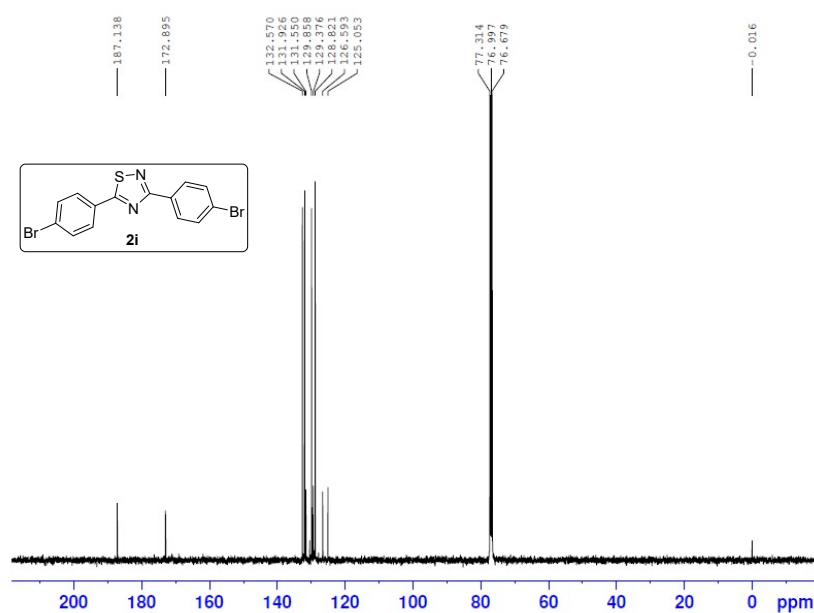

ANL-MCL5-NMR-007

## LCMS spectrum of Compound (2i)

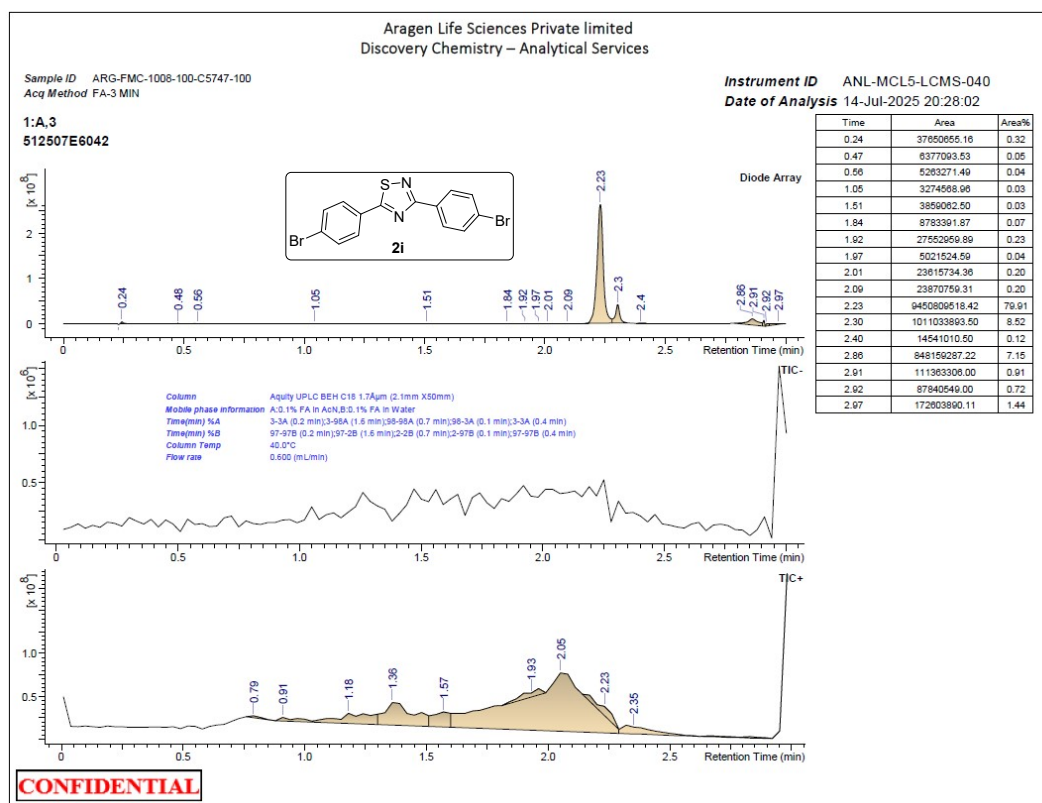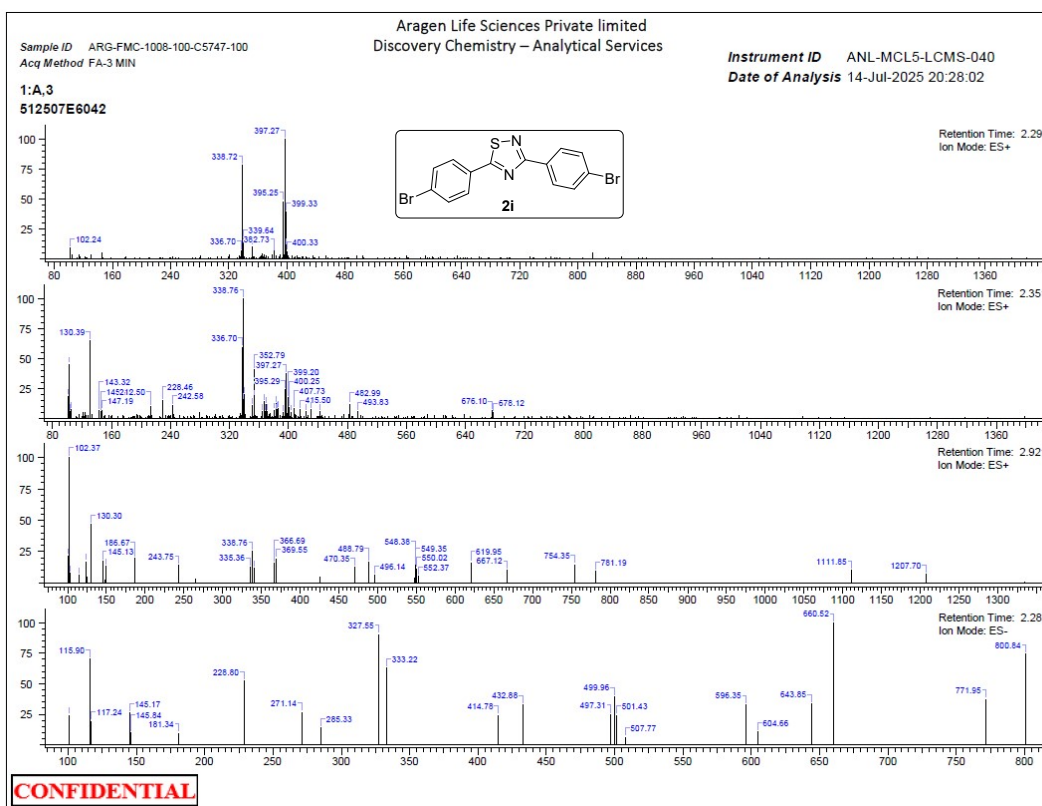



# **<sup>1</sup>H NMR spectrum (400 MHz) of Compound (2j) in DMSO-*d*<sub>6</sub>**

C5747-101

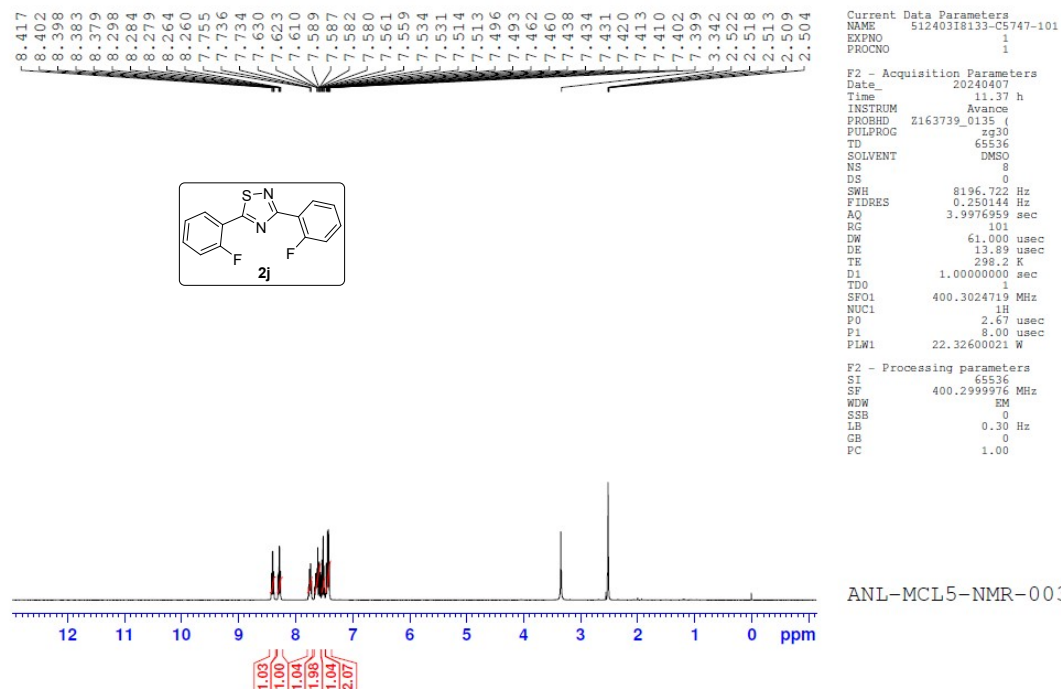

13

# **<sup>13</sup>C NMR spectrum (100 MHz) of Compound (2j) in DMSO-*d*<sub>6</sub>**

C5747-101

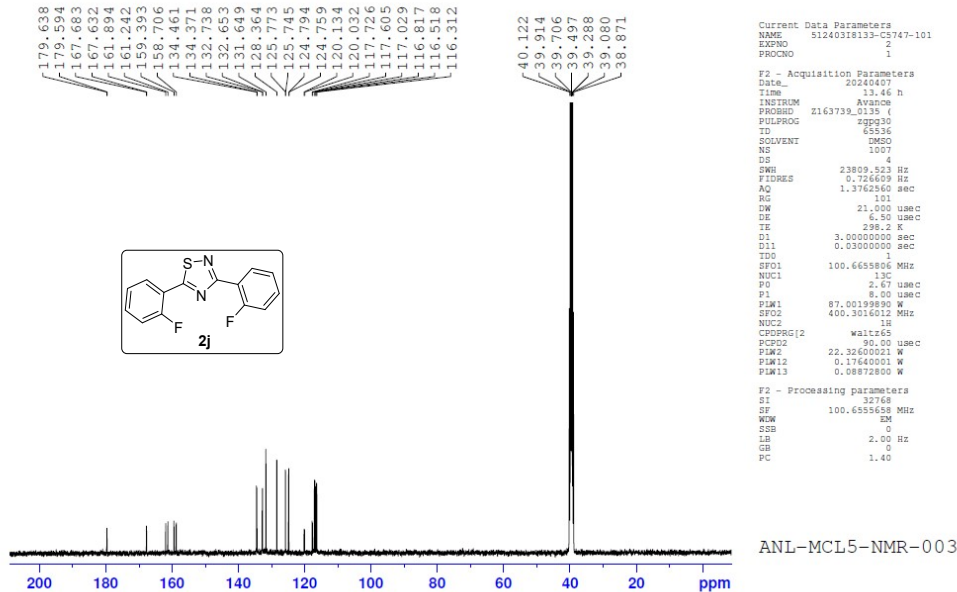

# **<sup>13</sup>C NMR spectrum (100 MHz) of Compound (2j) in DMSO-d<sub>6</sub> (Expansion)**

C5747-101

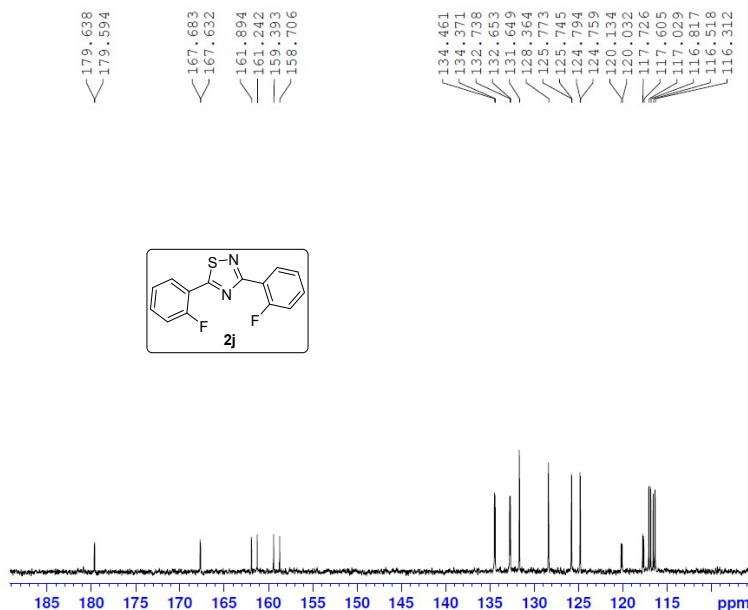

Current Data Parameters  
 NAME 5124031513-C5747-101  
 EXPNO 2  
 PROCNO 1  
 F2 - Acquisition Parameters  
 Date\_ 20240407  
 Time 13.46 h  
 INSTRUM Avance  
 PROBHD Z163739\_0135 (5  
 PULPROG zgpg30  
 TD 65536  
 SOLVENT DMSO  
 NS 1007  
 DS 4  
 SWH 23809.523 Hz  
 FIDRES 0.726609 Hz  
 AQ 1.3762560 sec  
 RG 101  
 DW 21.000 usec  
 DE 6.50 usec  
 TE 298.2 K  
 D1 3.00000000 sec  
 D11 0.03000000 sec  
 TDO 1  
 SFO1 100.6255806 MHz  
 NUC1 13C  
 P0 2.87 usec  
 PL 8.00 usec  
 PLW1 87.00199890 W  
 SFO2 400.3016012 MHz  
 NUC2 1H  
 CDPORG2 waltz45  
 PCPD2 90.00 usec  
 PLW2 22.32600021 W  
 PLW12 0.17540001 W  
 PLW13 0.08872800 W  
 F2 - Processing parameters  
 SI 32768  
 SF 100.6255806 MHz  
 WDW EM  
 SSB 0  
 LB 2.00 Hz  
 GB 0  
 PC 1.40

ANL-MCL5-NMR-003

# **<sup>19</sup>F NMR spectrum (400 MHz) of Compound (2j) in CDCl<sub>3</sub>**

C5747-101

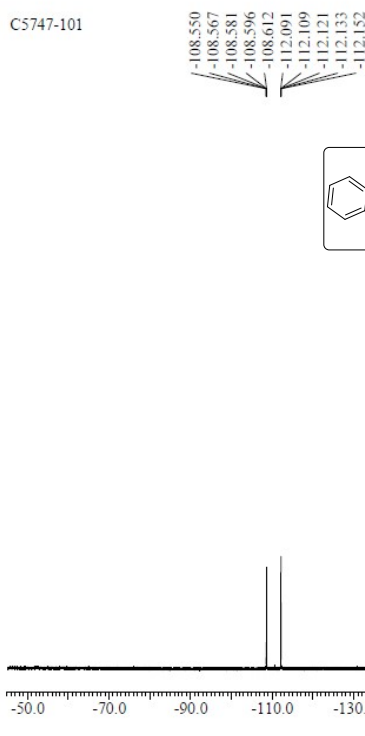

Current Data Parameters  
 Filename = 51240315494-C5747-101\_-  
 Author = Delta  
 Experiment = single\_pulse.jpg  
 Solvent = CHLOROFORM-D  
 Instrument = JNM-L400-400MHz  
 Field\_Strength = 9.389766(T) (400[MHz])  
 Relaxation\_Delay = 2[s]  
 Temp\_Set = 22.2[degC]  
 Recvr\_Gain = 56  
 X\_P0\_Width = 7.23[us]  
 X\_Points = 32768  
 X\_Acq\_Time = 0.38797312[s]  
 X\_Angle = 45[deg]  
 X\_Atn = 2.9[db]  
 X\_Pulse = 3.615[us]  
 X\_Sweep\_Clippped = 67.56756757[MHz]  
 X\_Resolution = 2.57749815[MHz]  
 Scans = 16  
 Actual\_Start\_Time = 27-MAR-2024 14:12:09

ANL-MCL5-NMR-005



## LCMS spectrum of Compound (2j)

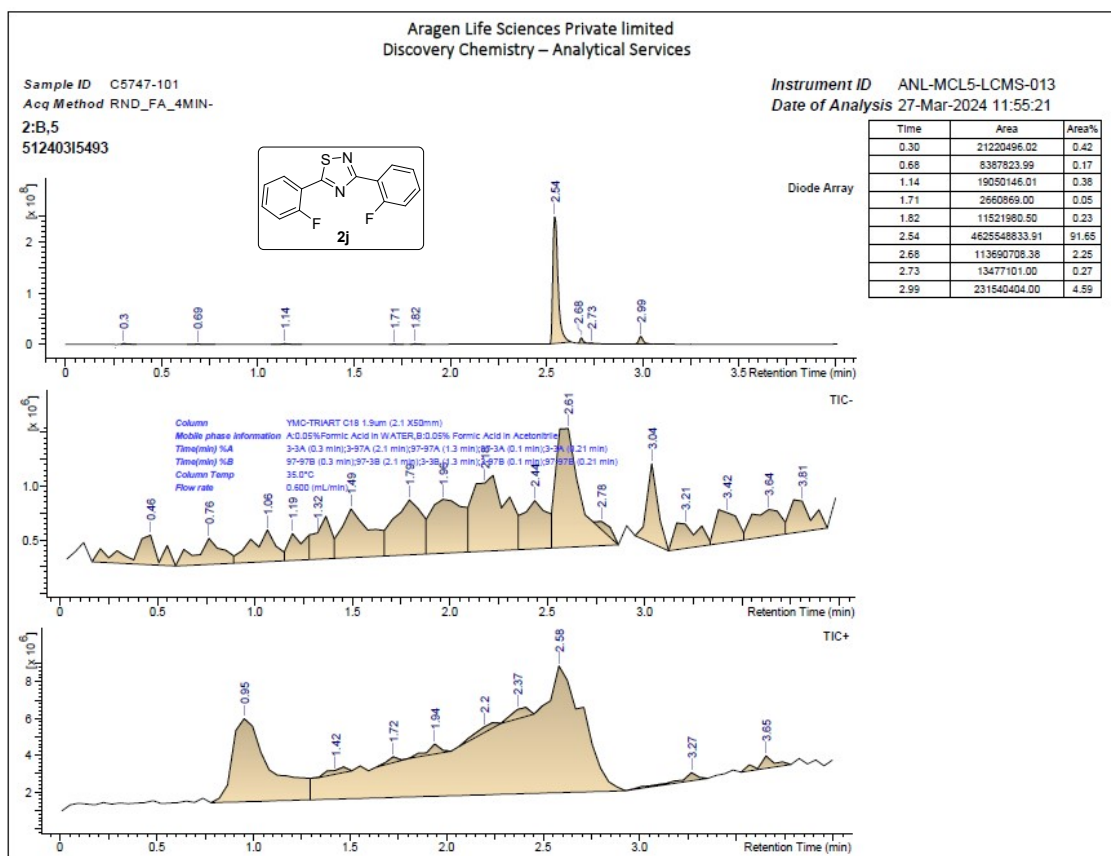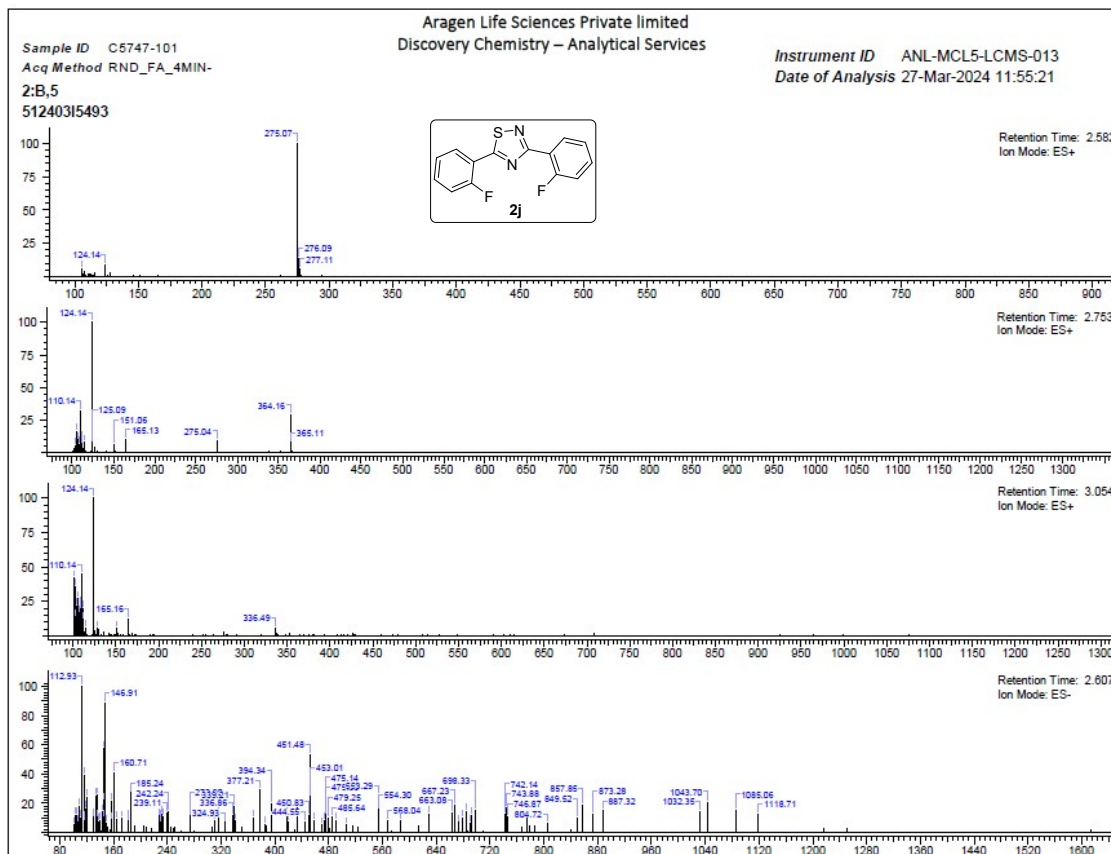

# <sup>1</sup>H NMR spectrum (400 MHz) of Compound (2k) in CDCl<sub>3</sub>

C5747-102

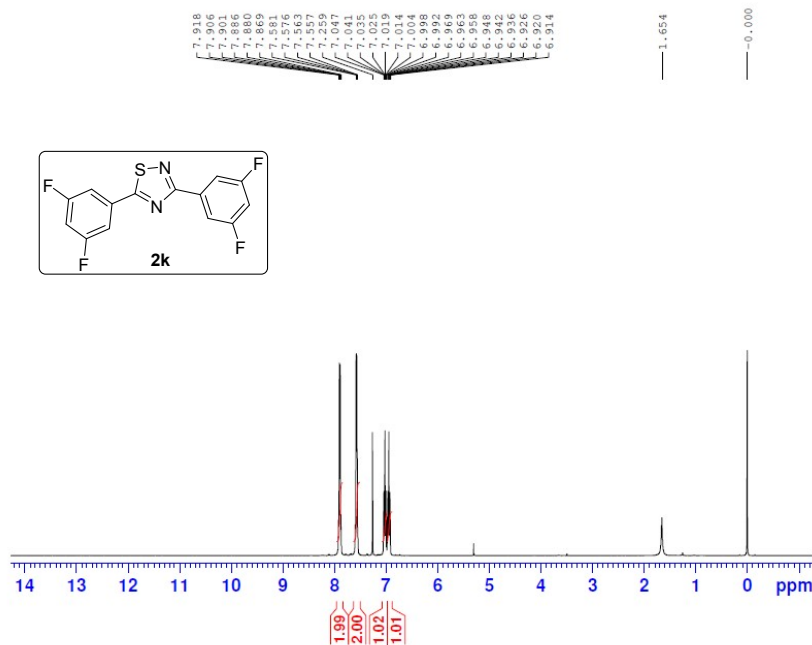

Current Data Parameters  
NAME 512507C5161-C5747-102  
EXPNO 1  
PROCNO 1

F2 - Acquisition Parameters  
Date\_ 20250713  
Time 10.08 h  
INSTRUM Avance  
PROBHD Z163739\_0686 (   
PULPROG zg30  
TD 65536  
SOLVENT CDCl3  
NS 8  
DS 0  
SWH 8196.722 Hz  
FIDRES 0.250144 Hz  
AQ 3.9976959 sec  
RG 101  
DW 61.000 usec  
DE 13.89 usec  
TE 298.2 K  
D1 1.00000000 sec  
TD0 1  
SFO1 400.6324739 MHz  
NUC1 1H  
P0 2.67 usec  
P1 8.00 usec  
PLW1 23.67700005 W

F2 - Processing parameters  
SI 65536  
SF 400.6300101 MHz  
WDW EM  
SSB 0  
LB 0.30 Hz  
GB 0  
PC 1.00

ANL-MCL5-NMR-010

C5747-102

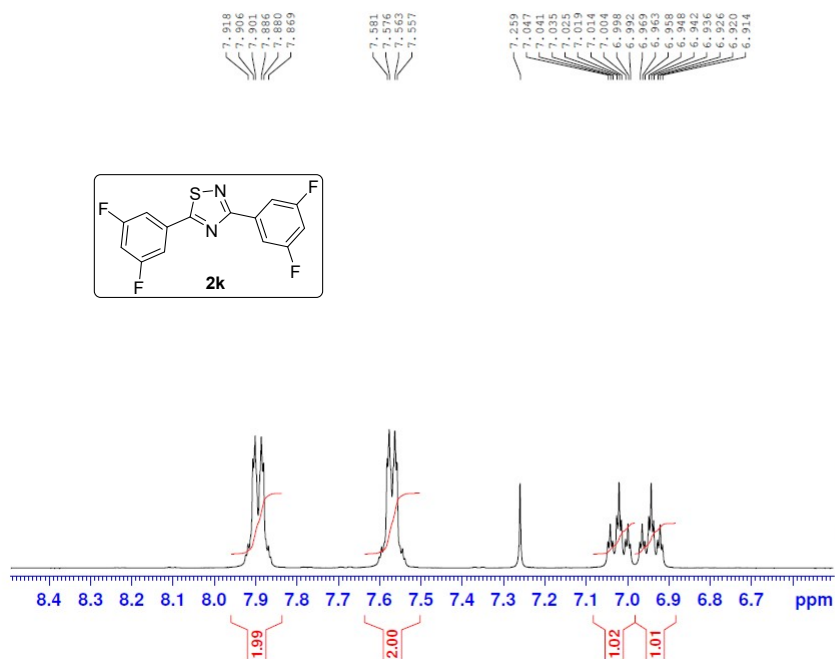

Current Data Parameters  
NAME 512507C5161-C5747-102  
EXPNO 1  
PROCNO 1

F2 - Acquisition Parameters  
Date\_ 20250713  
Time 10.08 h  
INSTRUM Avance  
PROBHD Z163739\_0686 (   
PULPROG zg30  
TD 65536  
SOLVENT CDCl3  
NS 8  
DS 0  
SWH 8196.722 Hz  
FIDRES 0.250144 Hz  
AQ 3.9976959 sec  
RG 101  
DW 61.000 usec  
DE 13.89 usec  
TE 298.2 K  
D1 1.00000000 sec  
TD0 1  
SFO1 400.6324739 MHz  
NUC1 1H  
P0 2.67 usec  
P1 8.00 usec  
PLW1 23.67700005 W

F2 - Processing parameters  
SI 65536  
SF 400.6300101 MHz  
WDW EM  
SSB 0  
LB 0.30 Hz  
GB 0  
PC 1.00

ANL-MCL5-NMR-010

**$^{13}\text{C}$  NMR spectrum (100 MHz) of Compound (2k) in  $\text{CDCl}_3$**

C5747-102

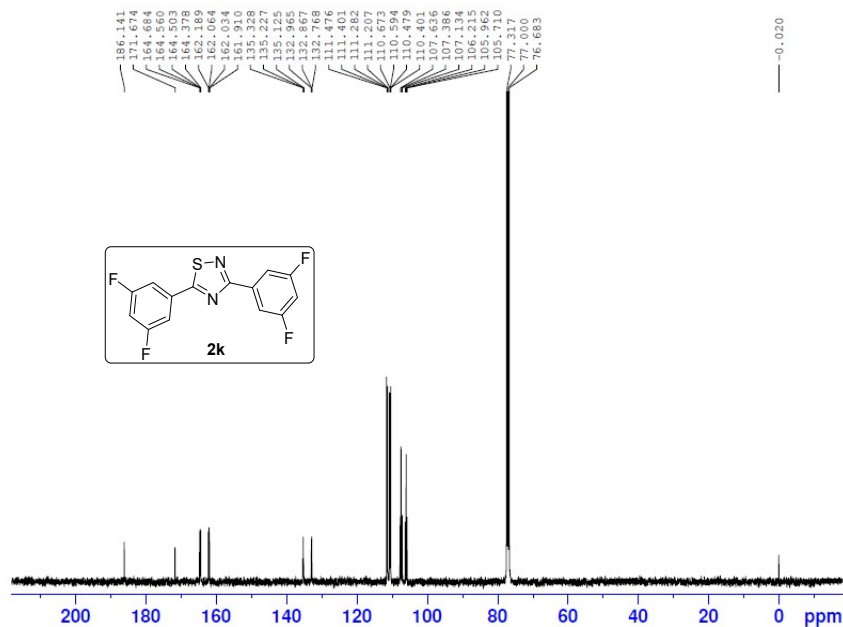

**CONFIDENTIAL**

```
Current Data Parameters
NAME      512507C5161-C5747-102
EXPNO      2
PROCNO     1
```

```

F2 - Acquisition Parameters
Date_      20250713
Time       11.36 h
INSTRUM    Avance
PROBHD      Z163739_0686 (
PULPROG     zgpg30
TD           65536
SOLVENT     CDCl3
NS           1500
DS           4
SWH          23809.523 Hz
FIDRES       0.726609 Hz
AQ           1.3762560 sec
RG           101
DW           21.000 usec
DE           6.50 usec
TE           298.2 K
D1           2.00000000 sec
D11          0.03000000 sec
TD0          1
SFO1         100.7485675 MHz
NUC1         13C
P0           2.67 usec
P1           8.00 usec
PLW1         94.71600342 W
SFO2         400.6316025 MHz
NUC2         1H
PCPDPRG[2]   waltz65
PCPD2        90.00 usec
PLW2         23.67700005 W
PLW12        0.18708000 W
PLW13        0.09409900 W

```

```
F2 - Processing parameters
SI              32768
SF              100.7384954 MHz
WDW              EM
SSB              0
LB              2.00 Hz
GB              0
PC              1.40
               ANI-MCL5-NMR-010
```

C5747-102

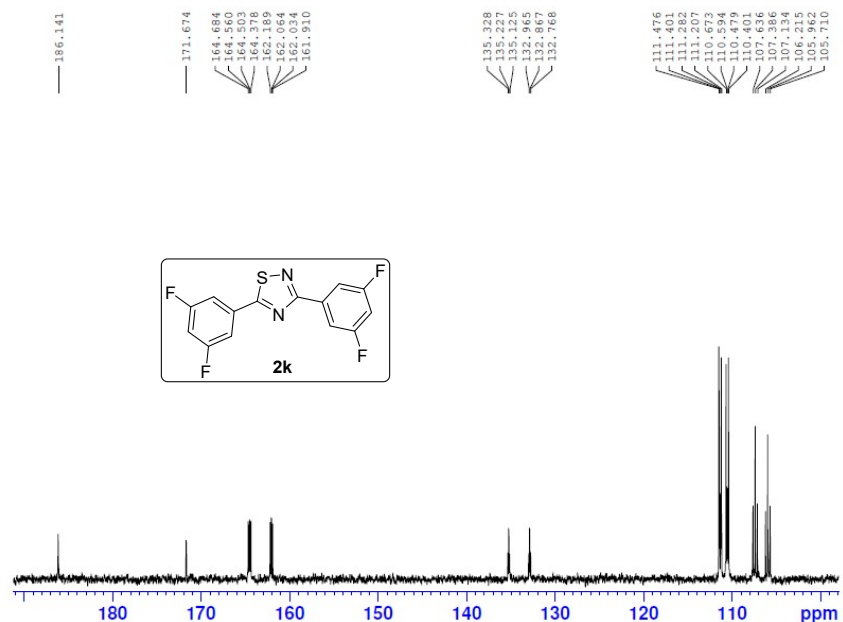

**CONFIDENTIAL**

```
Current Data Parameters
NAME          512507C5161-C5747-102
EXPNO          2
PROCNO         1
```

```

F2 - Acquisition Parameters
Date_      20250713
Time      11.36 h
INSTRUM    Avance
PROBHD      Z163739_0686 v
PULPROG     zgpg30
TD          65536
SOLVENT     CDCl3
NS          1500
DS          4
SWH         23809.523 Hz
FIDRES      0.726609 Hz
AQ          1.3762560 sec
RG          101
DW          21.000 usec
DE          6.50 usec
TE          298.2 K
D1          2.00000000 sec
D11         0.03000000 sec
TD0         1
SF01        100.7485675 MHz
NUC1        13C
P0          2.67 usec
P1          8.00 usec
PLW1        94.71600342 W
SF02        400.6316025 MHz
NUC2        1H
CPDPRG2     waltz65
PCPD2       90.00 usec
PLW2        23.67700005 W
PLW12       0.18708000 W
PLW13       0.09409900 W

```

```
F2 - Processing parameters
SI              32768
SF             100.7384954 MHz
WDW             EM
SSB             0
LB             2.00 Hz
GB             0
PC             1.40
ANL-MCL5-NMC-010
```

**<sup>19</sup>F NMR spectrum (400 MHz) of Compound (2k) in CDCl<sub>3</sub>**

C5747-102

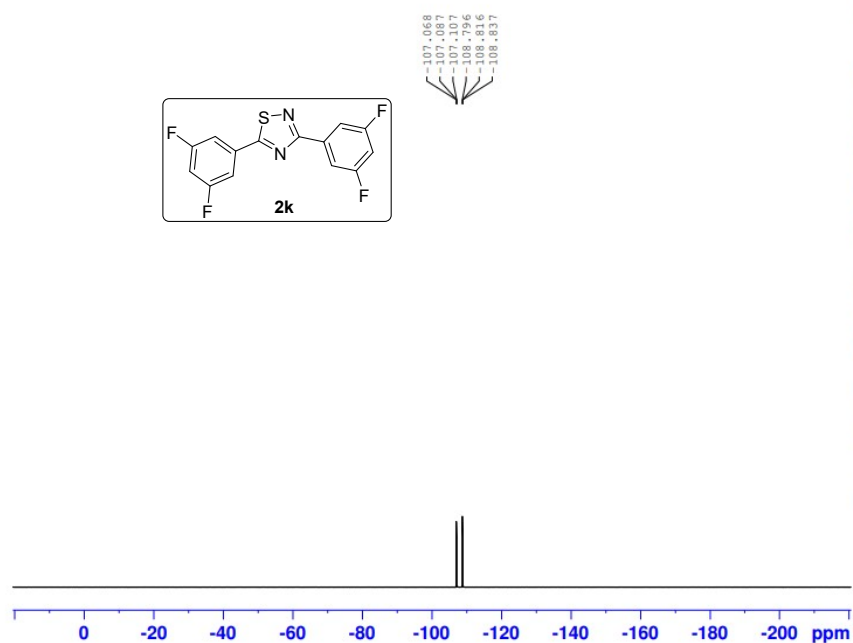

Current Data Parameters  
NAME 512507C5161-C5747-102  
EXPNO 3  
PROCNO 1

F2 - Acquisition Parameters  
Date\_ 20250713  
Time 17.05 h  
INSTRUM Avance  
PROBHD Z163739\_0686 (   
PULPROG zg  
TD 131072  
SOLVENT CDCl3  
NS 16  
DS 4  
SWH 90909.094 Hz  
FIDRES 1.387163 Hz  
AQ 0.7208960 sec  
RG 101  
DW 5.500 usec  
DE 6.50 usec  
TE 298.2 K  
D1 1.00000000 sec  
TD0 1  
SFO1 376.9311394 MHz  
NUC1 19F  
P1 12.00 usec  
PLW1 33.36899948 W

F2 - Processing parameters  
SI 65536  
SF 376.9688363 MHz  
WDW EM  
SSB 0  
LB 2.00 Hz  
GB 0  
PC 1.00

ANL-MCL5-NMR-010

LCMS spectrum of Compound (2k)

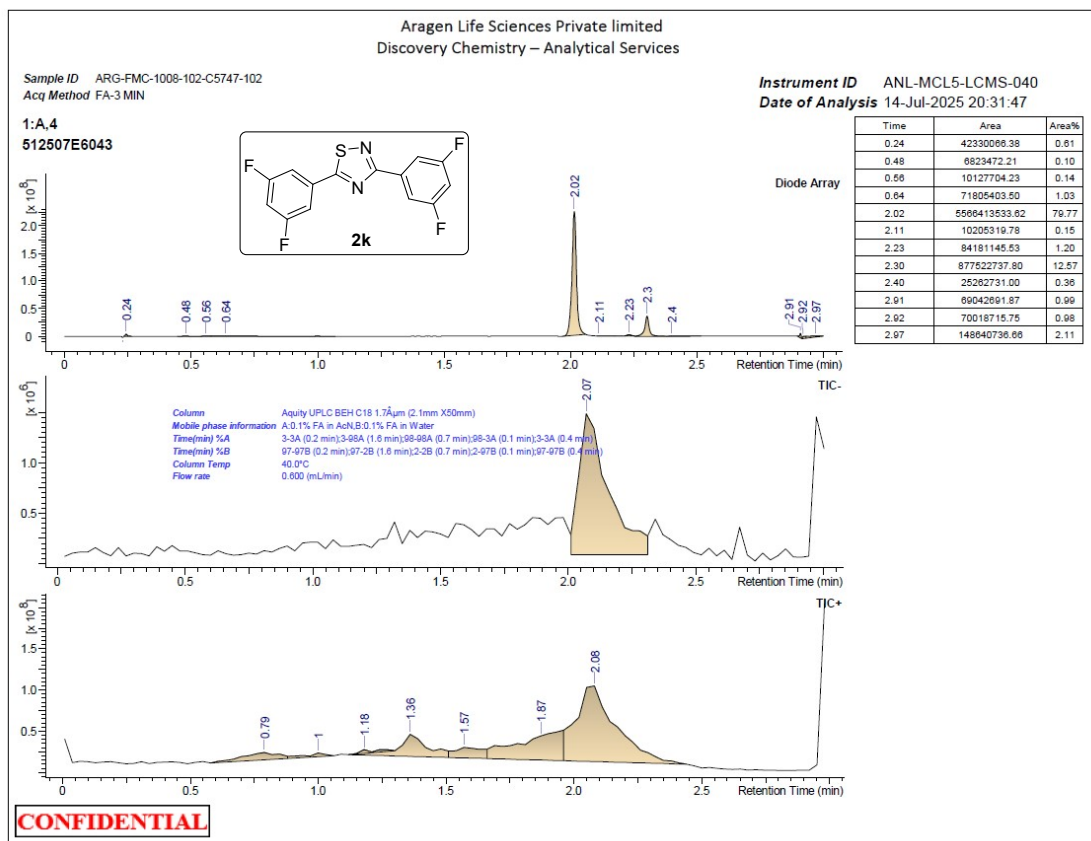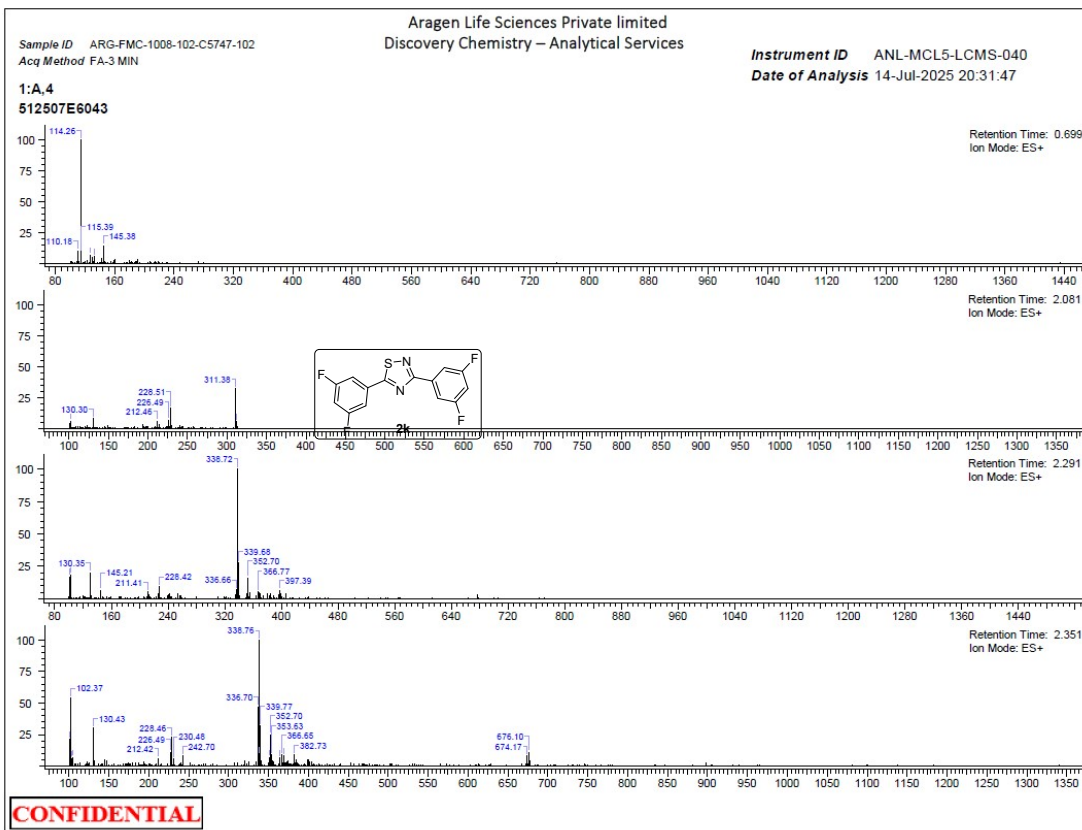

<sup>1</sup>H NMR spectrum (400 MHz) of Compound (2I) in CDCl<sub>3</sub>

C5747-106  
solubility problem

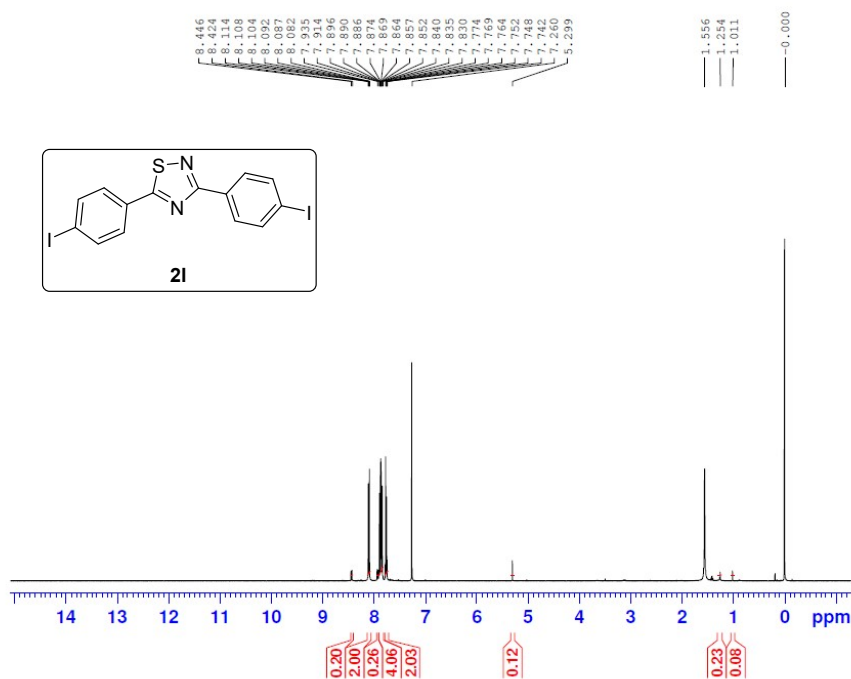

Current Data Parameters  
NAME 512507C5153-C5747-106  
EXPNO 1  
PROCNO 1

F2 - Acquisition Parameters  
Date\_ 20250713  
Time 16.41 h  
INSTRUM Avance  
PROBHD Z163739\_0686  
PULPROG zg30  
TD 65536  
SOLVENT CDCl3  
NS 8  
DS 0  
SWH 8196.722 Hz  
FIDRES 0.250144 Hz  
AQ 3.9976959 sec  
RG 101  
DW 61.000 usec  
DE 13.89 usec  
TE 298.2 K  
D1 1.00000000 sec  
TD0 1  
SFO1 400.6324739 MHz  
NUC1 1H  
P0 2.67 usec  
P1 8.00 usec  
PLW1 23.67700005 W

F2 - Processing parameters  
SI 65536  
SF 400.6300096 MHz  
WDW EM  
SSB 0  
LB 0.30 Hz  
GB 0  
PC 1.00

CONFIDENTIAL

ANL-MCL5-NMR-010

<sup>13</sup>C NMR spectrum (100 MHz) of Compound (2I) in CDCl<sub>3</sub>



C5747-106  
solubility problem

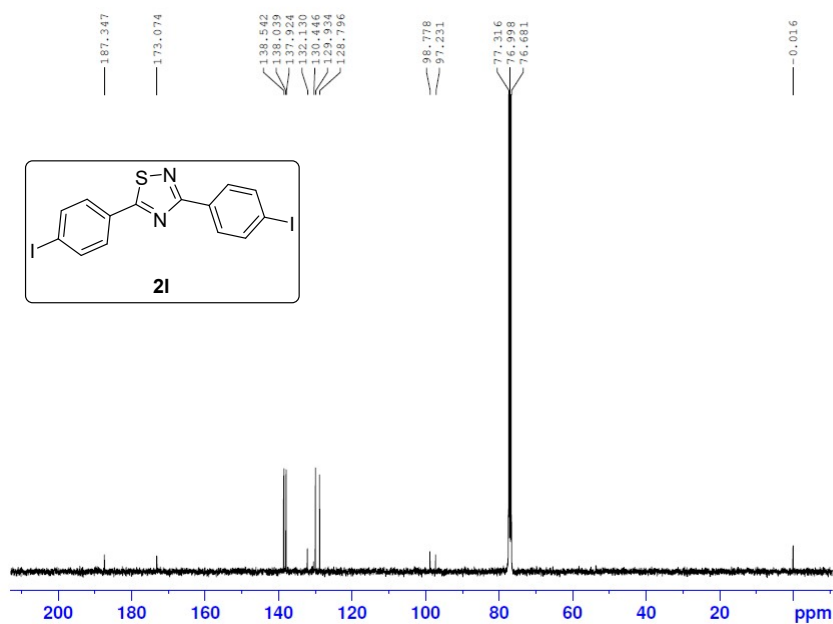

Current Data Parameters  
NAME 512507C5153-C5747-106  
EXPNO 3  
PROCNO 1

F2 - Acquisition Parameters  
Date\_ 20250713  
Time 21.42 h  
INSTRUM Avance  
PROBHD Z163739\_0686 ( )  
PULPROG zgpg30  
TD 65536  
SOLVENT CDCl3  
NS 2000  
DS 4  
SWH 23809.523 Hz  
FIDRES 0.726609 Hz  
AQ 1.3762560 sec  
RG 101  
DW 21.000 usec  
DE 6.50 usec  
TE 298.2 K  
D1 2.00000000 sec  
D11 0.03000000 sec  
TD0 1  
SFO1 100.7485675 MHz  
NUC1 13C  
P0 2.67 usec  
P1 8.00 usec  
PLW1 94.71600342 W  
SFO2 400.6316025 MHz  
NUC2 1H  
CPDPRG[2] waltz65  
PCPD2 90.00 usec  
PLW2 23.67700005 W  
PLW12 0.18708000 W  
PLW13 0.09409900 W

F2 - Processing parameters  
SI 32768  
SF 100.7384957 MHz  
WDW EM  
SSB 0  
LB 2.00 Hz  
GB 0  
PC ANL-MCL5-NMR-010

CONFIDENTIAL

C5747-106  
solubility problem

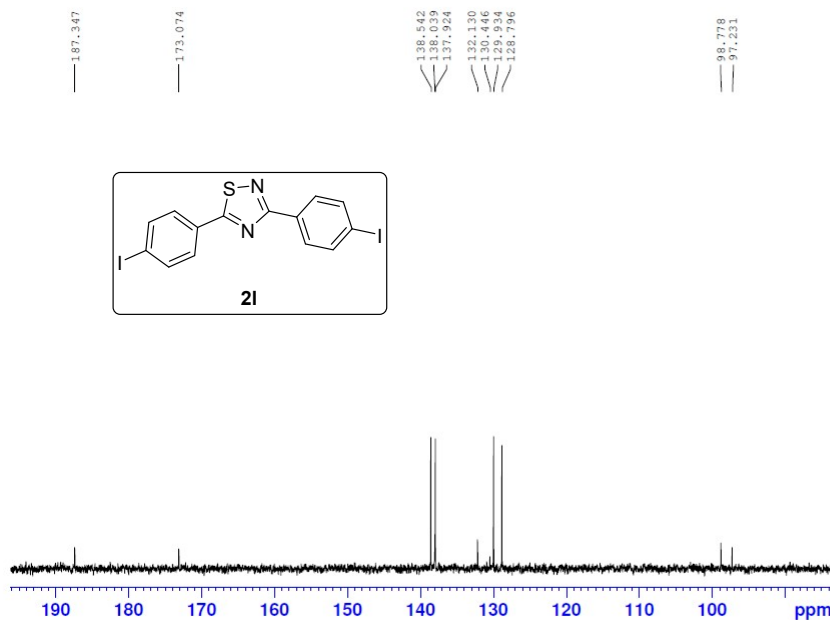

Current Data Parameters  
NAME 512507C5153-C5747-106  
EXPNO 3  
PROCNO 1

F2 - Acquisition Parameters  
Date\_ 20250713  
Time 21.42 h  
INSTRUM Avance  
PROBHD Z163739\_0686 ( )  
PULPROG zgpg30  
TD 65536  
SOLVENT CDCl3  
NS 2000  
DS 4  
SWH 23809.523 Hz  
FIDRES 0.726609 Hz  
AQ 1.3762560 sec  
RG 101  
DW 21.000 usec  
DE 6.50 usec  
TE 298.2 K  
D1 2.00000000 sec  
D11 0.03000000 sec  
TD0 1  
SFO1 100.7485675 MHz  
NUC1 13C  
P0 2.67 usec  
P1 8.00 usec  
PLW1 94.71600342 W  
SFO2 400.6316025 MHz  
NUC2 1H  
CPDPRG[2] waltz65  
PCPD2 90.00 usec  
PLW2 23.67700005 W  
PLW12 0.18708000 W  
PLW13 0.09409900 W

F2 - Processing parameters  
SI 32768  
SF 100.7384957 MHz  
WDW EM  
SSB 0  
LB 2.00 Hz  
GB 0  
PC ANL-MCL5-NMR-010

CONFIDENTIAL

LCMS spectrum of Compound (2I)

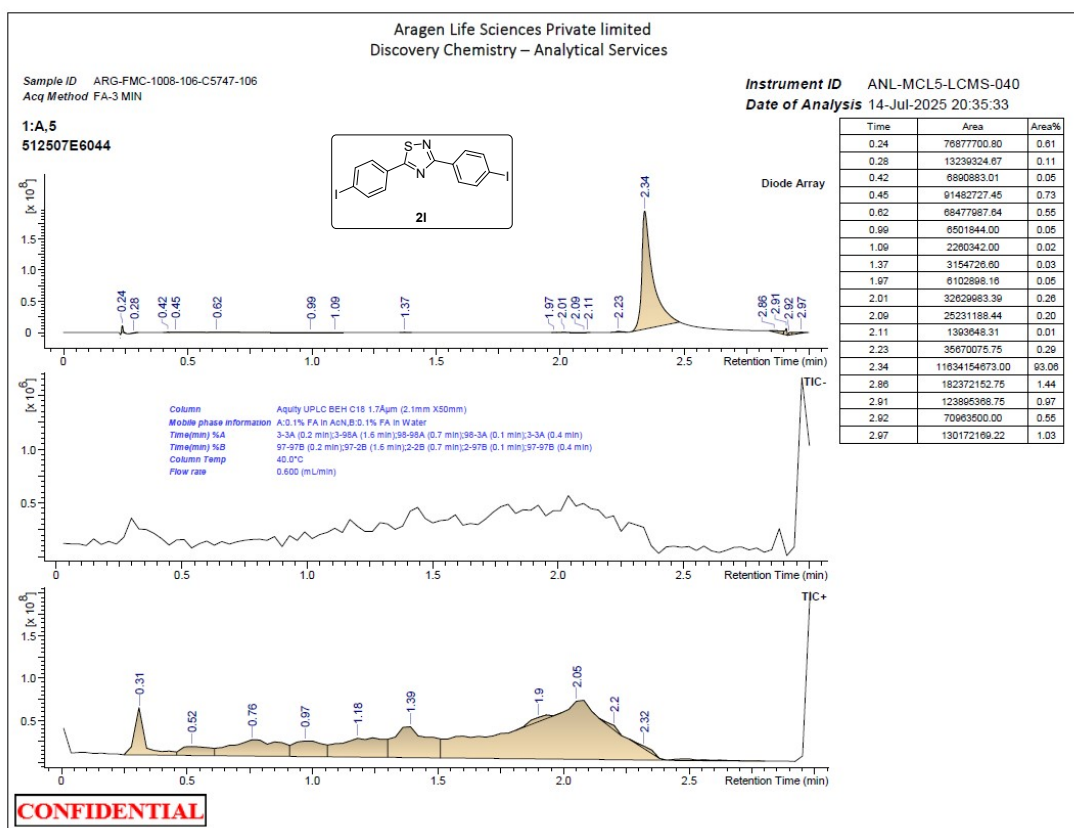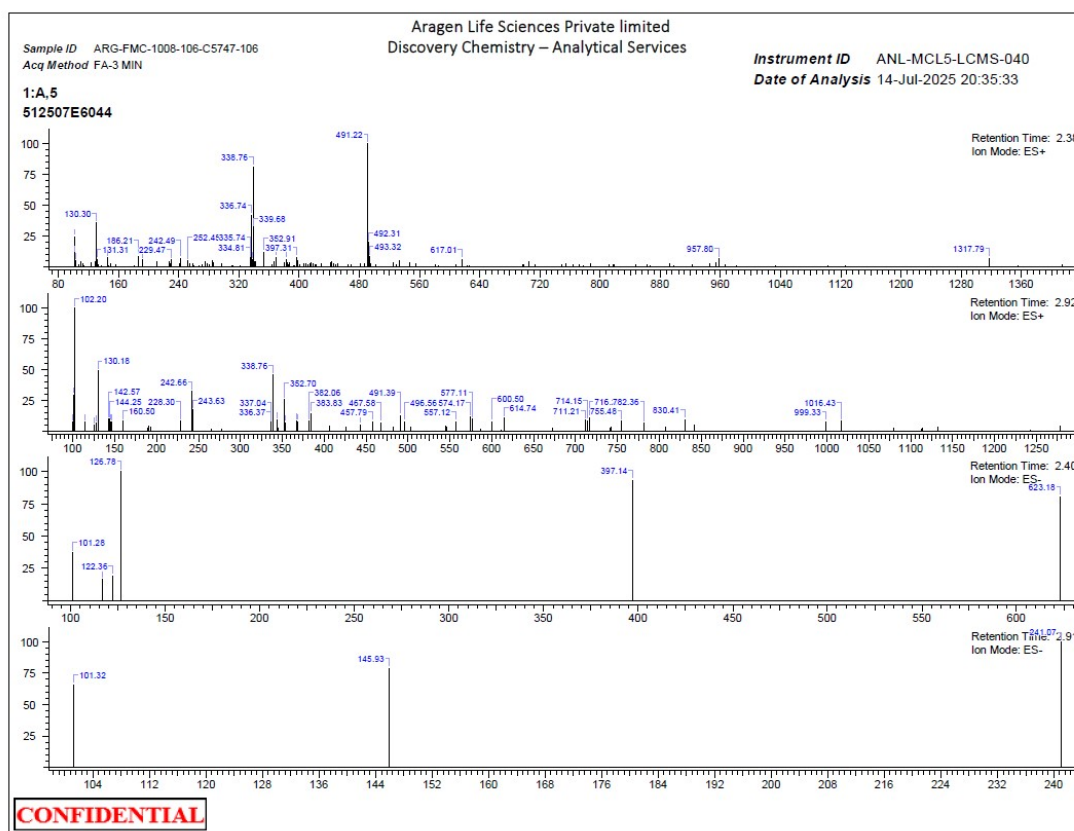

<sup>1</sup>H NMR spectrum (500 MHz) of Compound (2m) in DMSO-d<sub>6</sub>



Chemical structure of **2m**: Cc1ccc(cc1)-c2nc(Cc3ccc(C)cc3)cs2

<sup>1</sup>H NMR spectrum (DMSO-d<sub>6</sub>) of compound **2m**. The x-axis represents the chemical shift in ppm, ranging from 0 to 13. The spectrum shows several peaks with corresponding integration values below them.

| Chemical Shift (ppm) | Integration |
|----------------------|-------------|
| 8.139                | 1.00        |
| 8.115                | 1.00        |
| 8.100                | 1.00        |
| 7.934                | 0.99        |
| 7.908                | 1.00        |
| 7.893                | 1.00        |
| 7.512                | 3.07        |
| 7.497                | 1.00        |
| 7.482                | 1.00        |
| 7.468                | 1.00        |
| 7.454                | 1.00        |
| 7.438                | 1.00        |
| 7.379                | 1.00        |
| 7.364                | 1.00        |
| 3.348                | 6.04        |
| 1.190                | 0.01        |

Additional NMR parameters listed on the right:

- NAME: 51240788063-C5747-105
- EXPNO: 1
- PROCNO: 1
- F2 - Acquisition Parameters
- Date\_: 20240707
- Time: 11.42 h
- INSTRUM: spect
- PROBHD: Z119470\_0231 (
- PULPROG: zgpg
- SOLVENT: DMSO
- NS: 8
- DS: 0
- SWH: 10000.000 Hz
- FIDRES: 0.305176 Hz
- AQ: 3.2767999 sec
- RG: 97.81
- DW: 50.000 usec
- DE: 13.89 usec
- TE: 299.0 K
- D1: 1.00000000 sec
- TDO: 1
- SFO1: 500.1330883 MHz
- NUC1: 1H
- PO: 3.33 usec
- P1: 10.00 usec
- PLW1: 22.92900085 W
- F2 - Processing parameters
- SI: 65536
- SF: 500.1299975 MHz
- WUW: EM
- SSB: 0
- LB: 0.30 Hz
- CB: 0
- PC: 1.00

**<sup>13</sup>C NMR spectrum (125 MHz) of Compound (2m) in DMSO-*d*<sub>6</sub>**

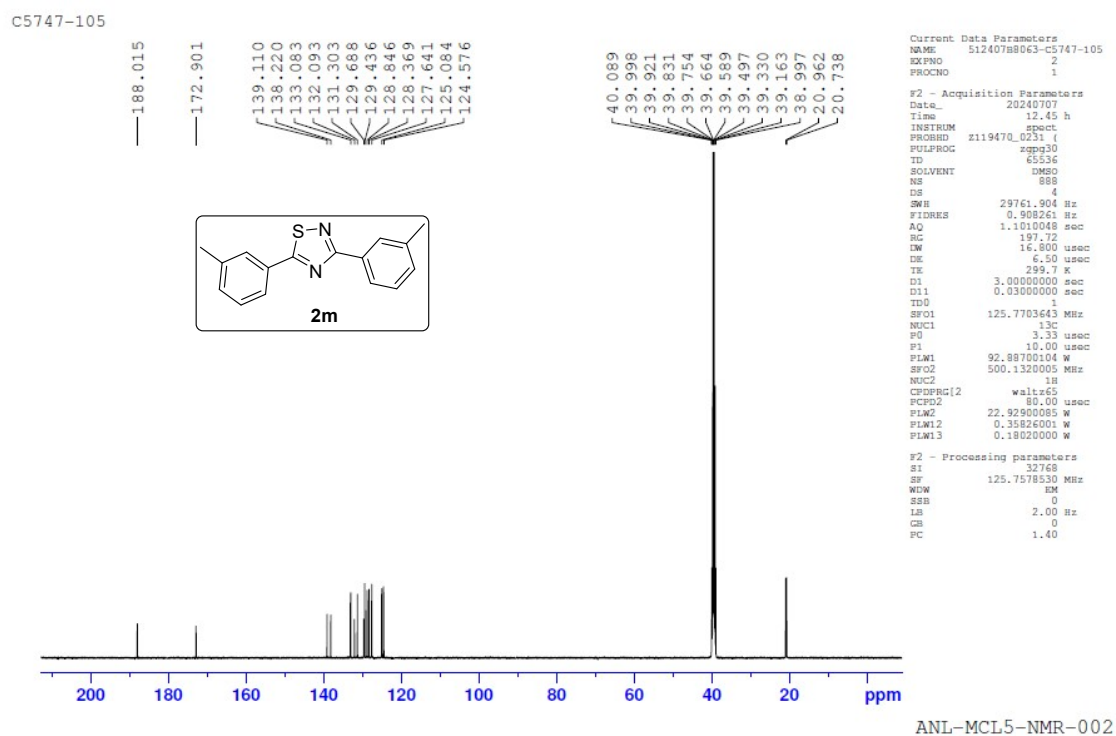

**LCMS spectrum of Compound (2m)**

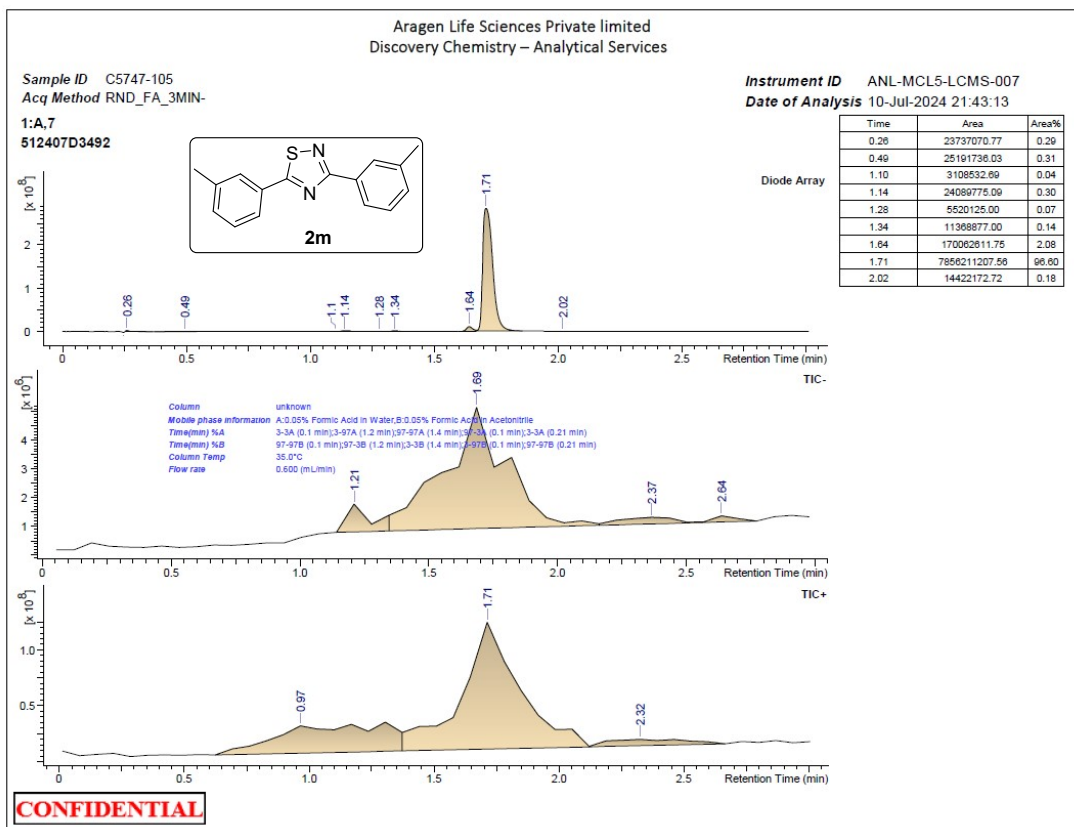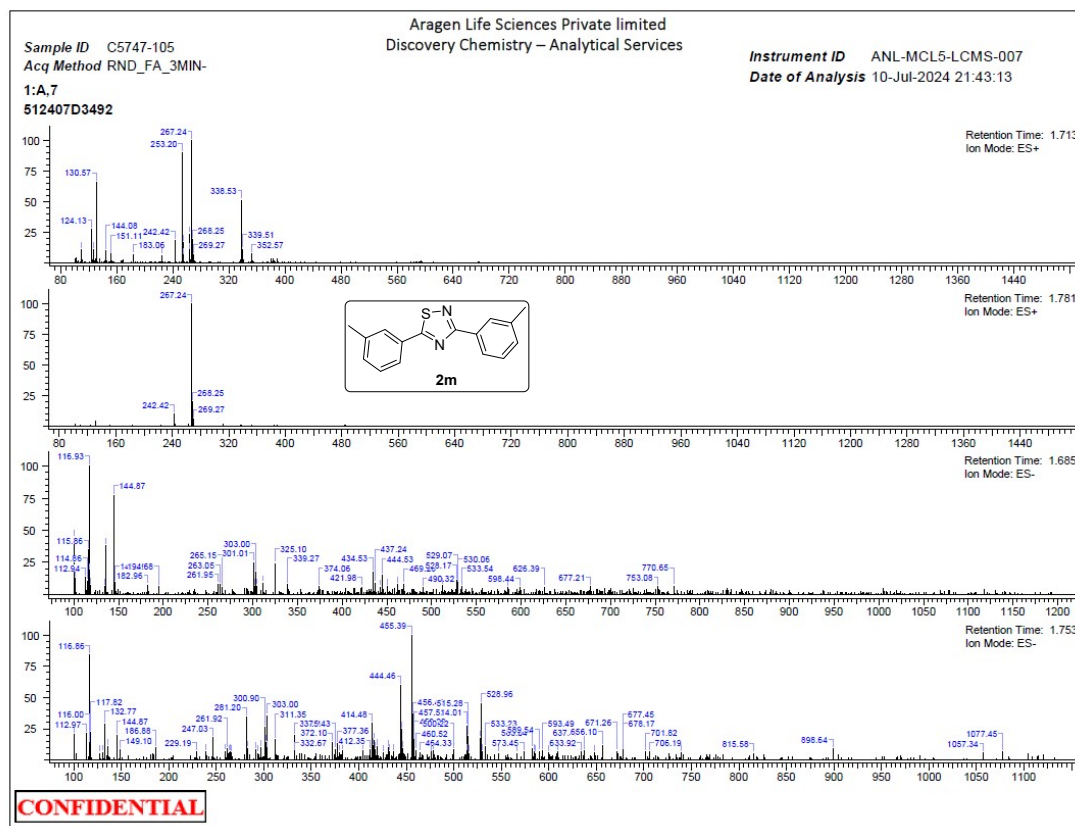

<sup>1</sup>H NMR spectrum (500 MHz) of Compound (2n) in DMSO-d<sub>6</sub>

C5747-107

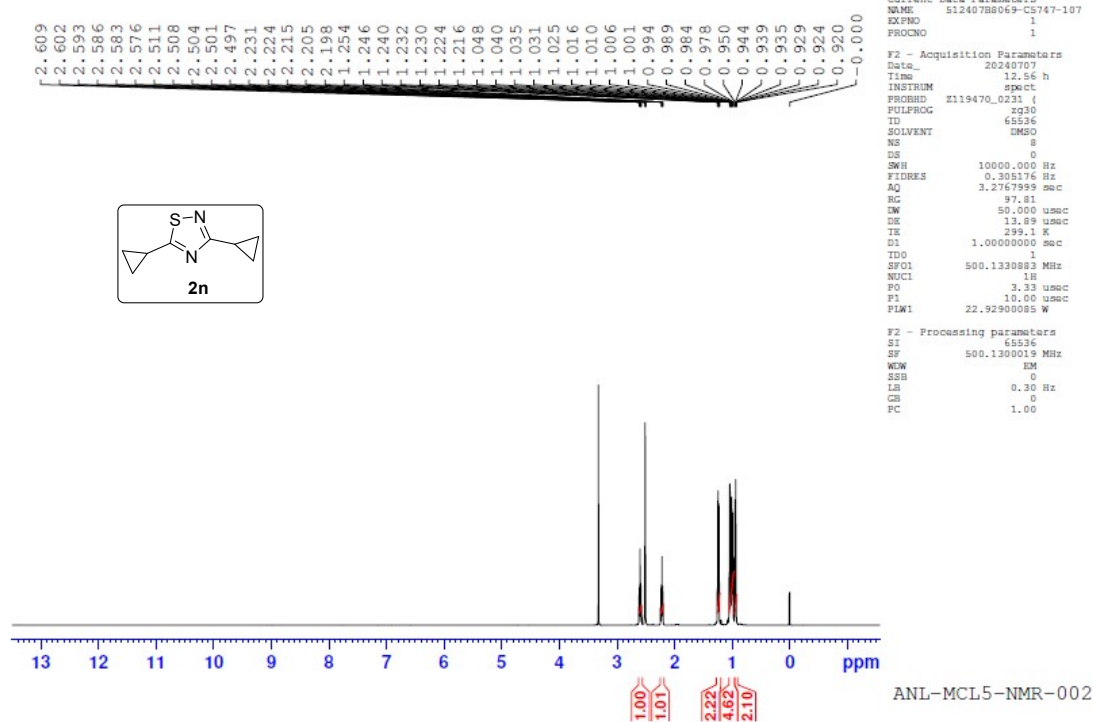<sup>13</sup>C NMR spectrum (100 MHz) of Compound (2n) in DMSO-*d*<sub>6</sub>

C5747-107

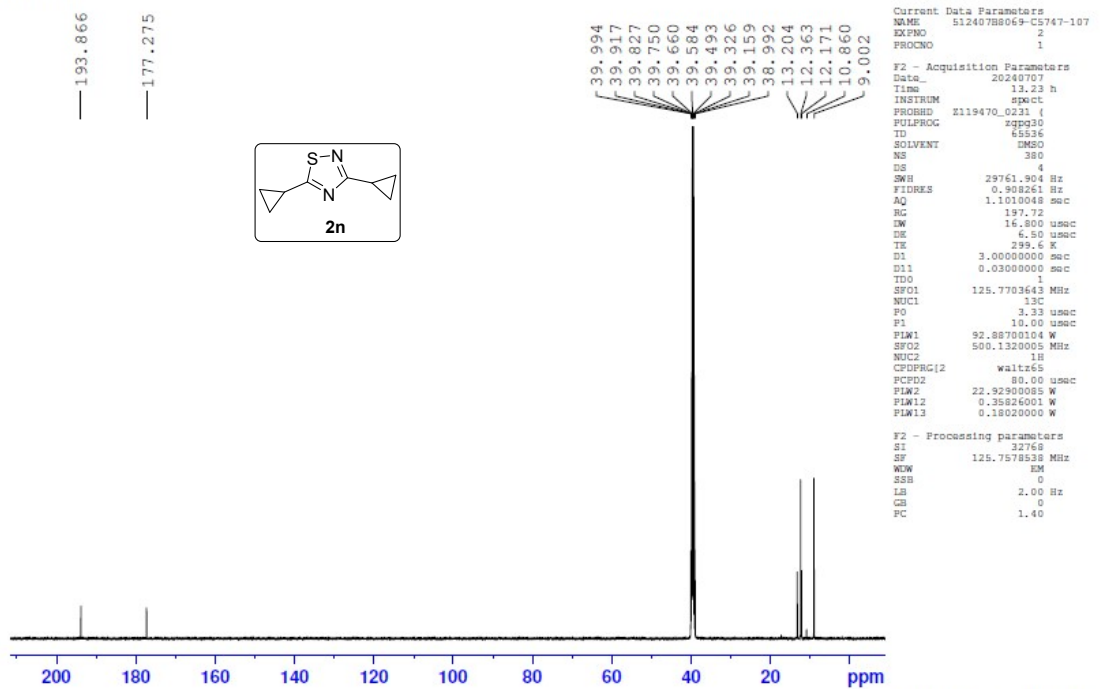

LCMS spectrum of Compound (2n)

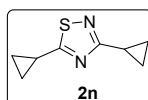

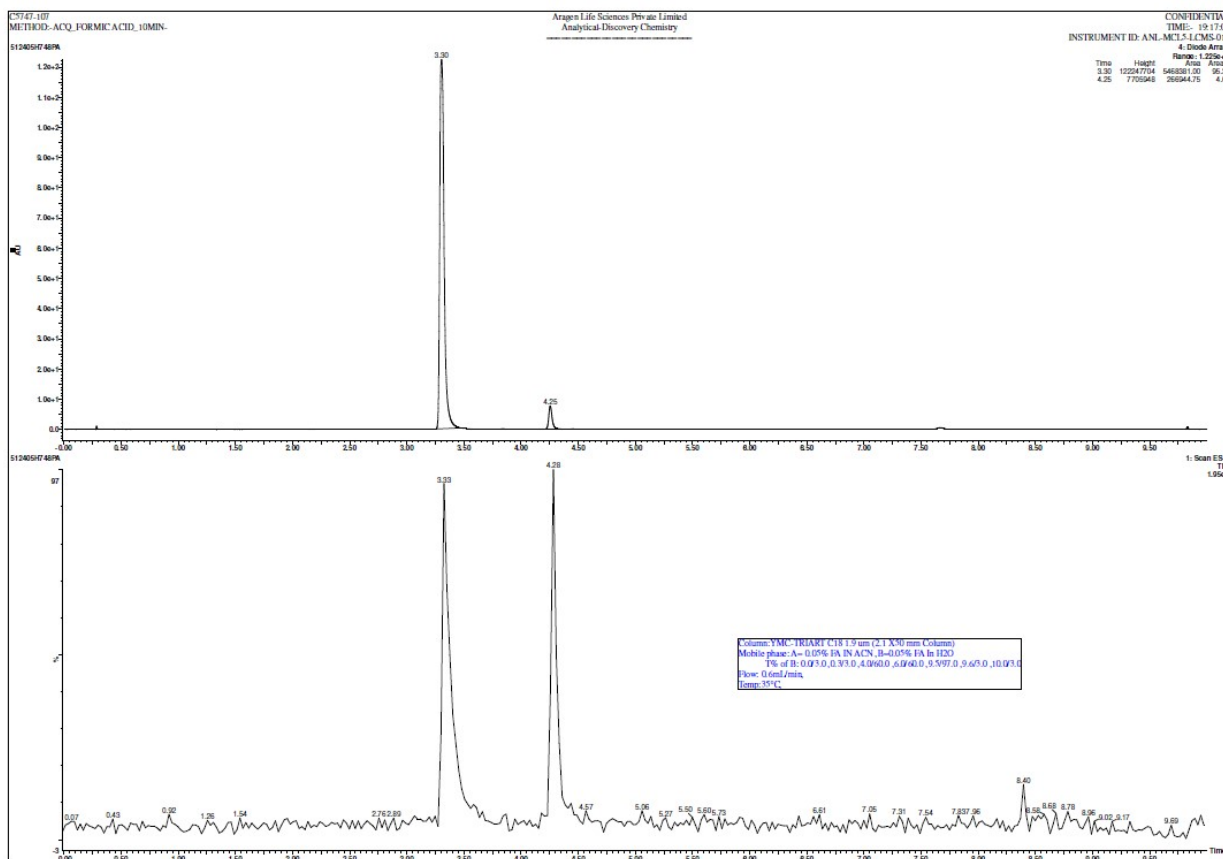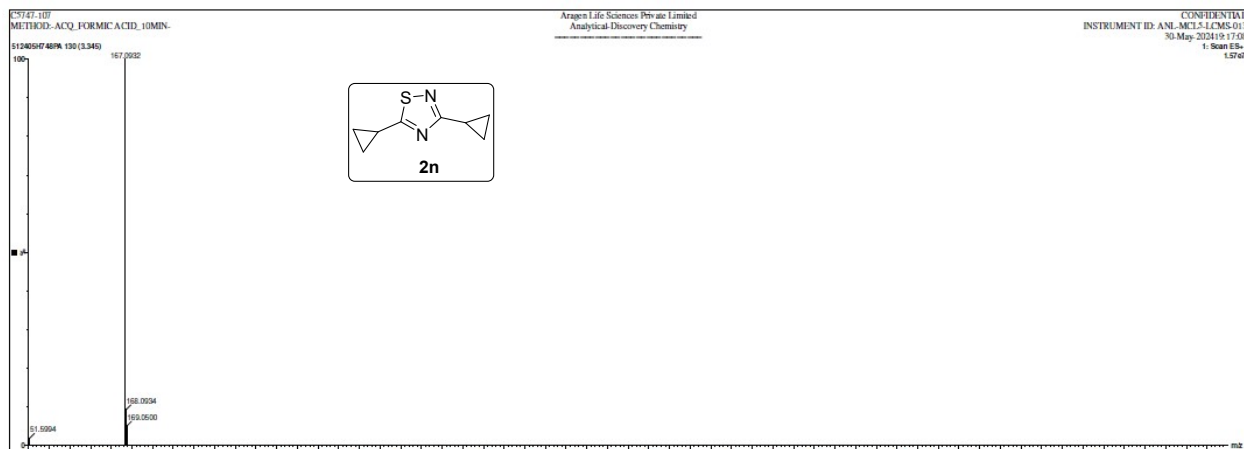

<sup>1</sup>H NMR spectrum (400 MHz) of Compound (2o) in DMSO-d<sub>6</sub>

FMC-ARG-C5747-109

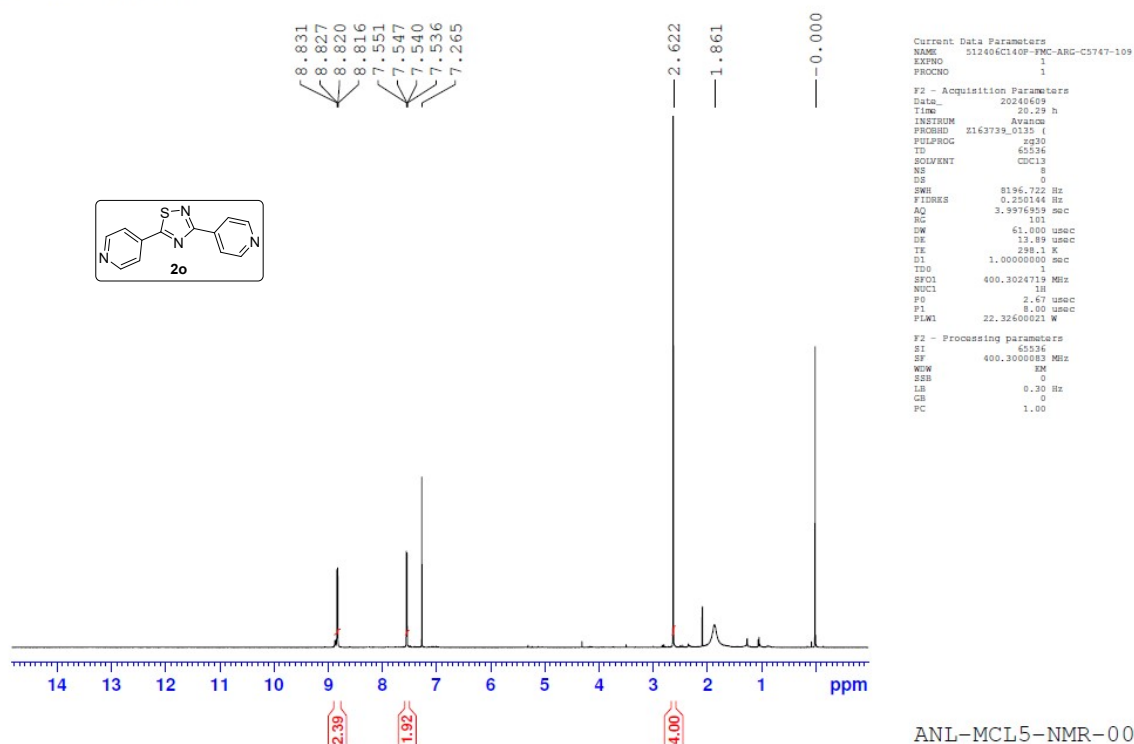**<sup>13</sup>C NMR spectrum (100 MHz) of Compound (2o) in DMSO-d<sub>6</sub>**

C5747-109

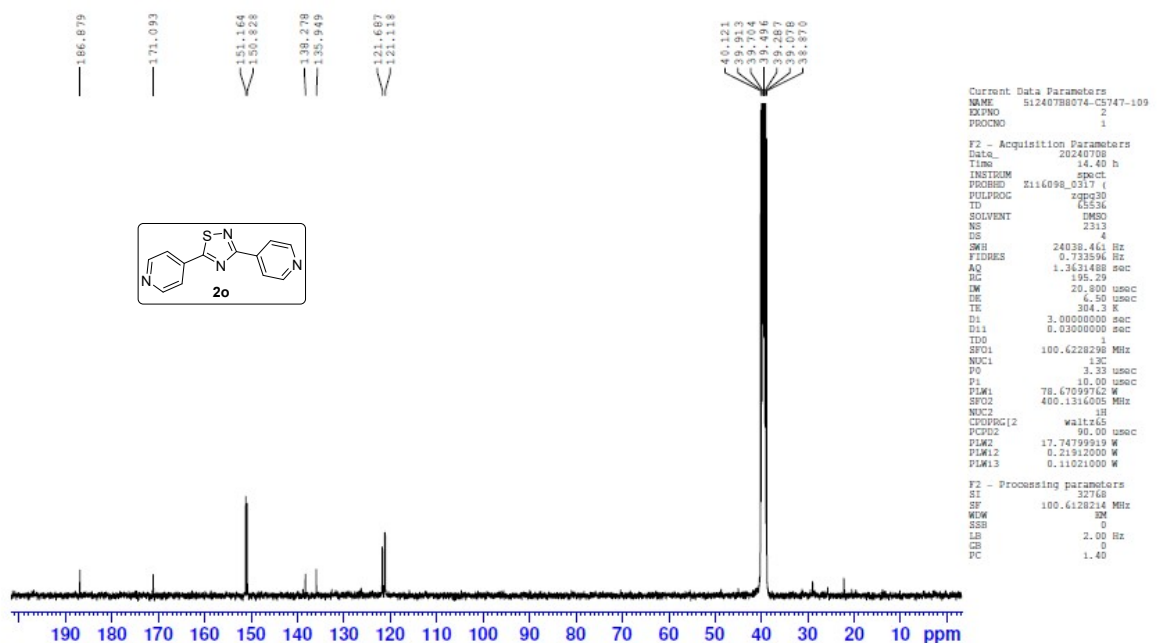**LCMS spectrum of Compound (2o)**

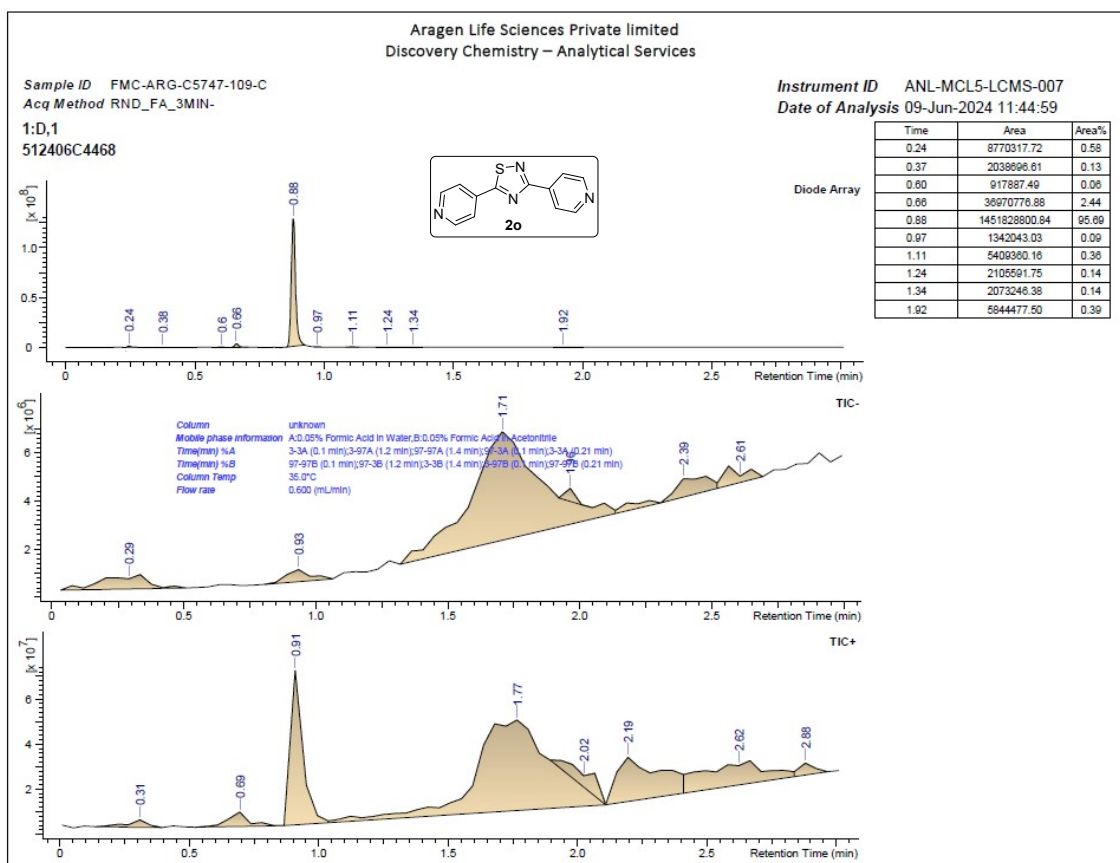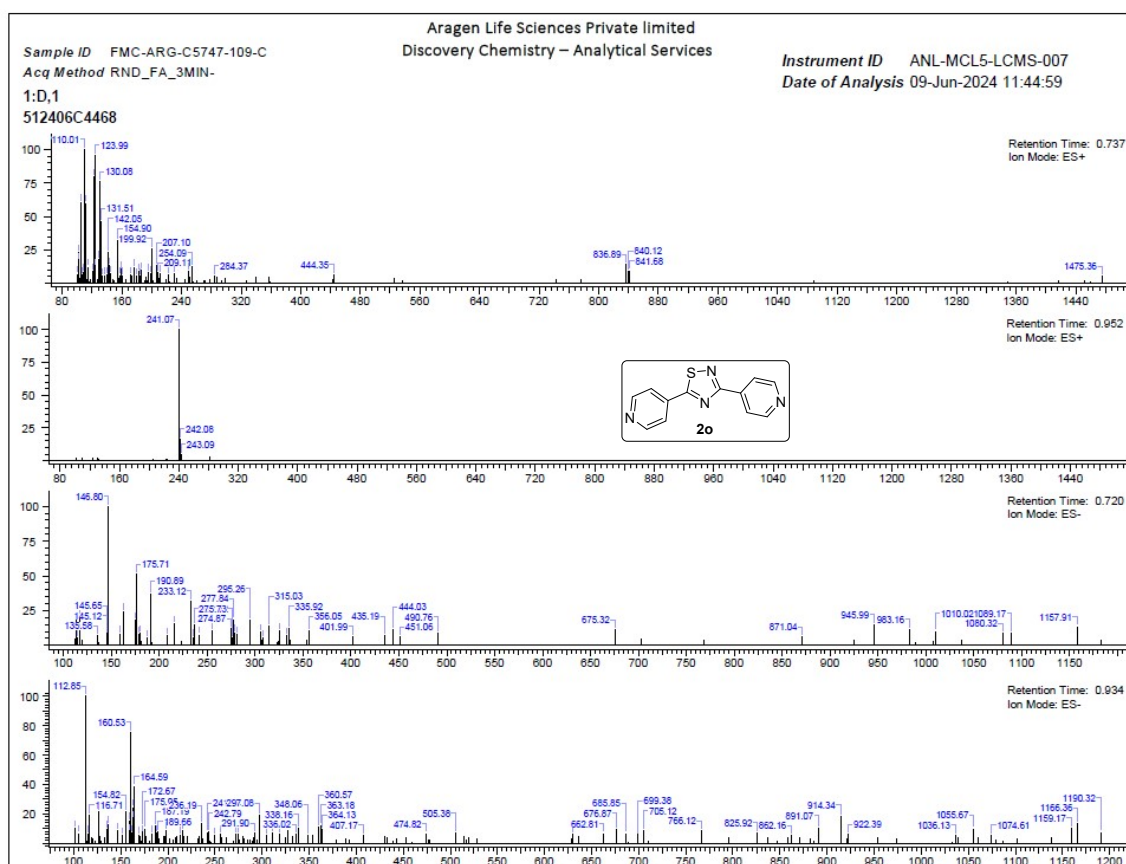

<sup>1</sup>H NMR spectrum (500 MHz) of Compound (2p) in DMSO-d<sub>6</sub>



**Chemical structure of 2p:** c1ccc(cc1)-c2nc3ccccc3n2

**<sup>1</sup>H NMR spectrum (CDCl<sub>3</sub>):**

| Chemical Shift (ppm) | Integration |
|----------------------|-------------|
| 9.480                | 0.99        |
| 9.339                | 0.98        |
| 9.335                | 1.04        |
| 8.835                | 1.00        |
| 8.835                | 1.05        |
| 8.829                | 1.04        |
| 8.825                | 1.07        |
| 8.772                | 1.19        |
| 8.769                |             |
| 8.763                |             |
| 8.760                |             |
| 8.641                |             |
| 8.637                |             |
| 8.625                |             |
| 8.621                |             |
| 8.544                |             |
| 8.540                |             |
| 8.539                |             |
| 8.536                |             |
| 8.528                |             |
| 8.524                |             |
| 8.523                |             |
| 7.688                |             |
| 7.686                |             |
| 7.678                |             |
| 7.677                |             |
| 7.672                |             |
| 7.670                |             |
| 7.662                |             |
| 7.661                |             |
| 7.642                |             |
| 7.641                |             |
| 7.632                |             |
| 7.631                |             |
| 7.626                |             |
| 7.625                |             |
| 7.616                |             |
| 7.615                |             |
| 3.327                | 0.05        |
| 2.515                | 0.41        |
| 2.512                |             |
| 2.508                |             |
| 2.505                |             |
| 2.501                |             |

ANL-MCL5-NMR-002

Chemical structure of **2p**: c1ccc(cc1)-c2nc(s2)-c3cccnc3

<sup>1</sup>H NMR spectrum (DMSO-d<sub>6</sub>) of compound **2p**. The x-axis represents the chemical shift in ppm, ranging from 20 to 200. The spectrum shows several peaks in the aromatic region (120-160 ppm) and a cluster of peaks in the aliphatic region (3.8-4.1 ppm). A list of peak chemical shifts is provided on the right side of the spectrum.

Peak chemical shifts (ppm):

- 185.827
- 170.609
- 152.989
- 151.456
- 148.792
- 148.081
- 135.213
- 135.055
- 127.733
- 125.827
- 124.487
- 124.141
- 4.085
- 3.995
- 3.919
- 3.828
- 3.752
- 3.661
- 3.585
- 3.494
- 3.327
- 3.160
- 3.093

50

SAMPLE CODE: C5747-110  
Acq Method: ARAGEN\_LCMS\_305

Aragen Life Sciences Private Limited  
Discovery Chemistry Analytical Services

Date & Time: 13-Jun-2024;10:30:53  
Instrument ID: ANL-MCL5-LCMS-032

512406D171P-A Sm (Mn, 3x3)

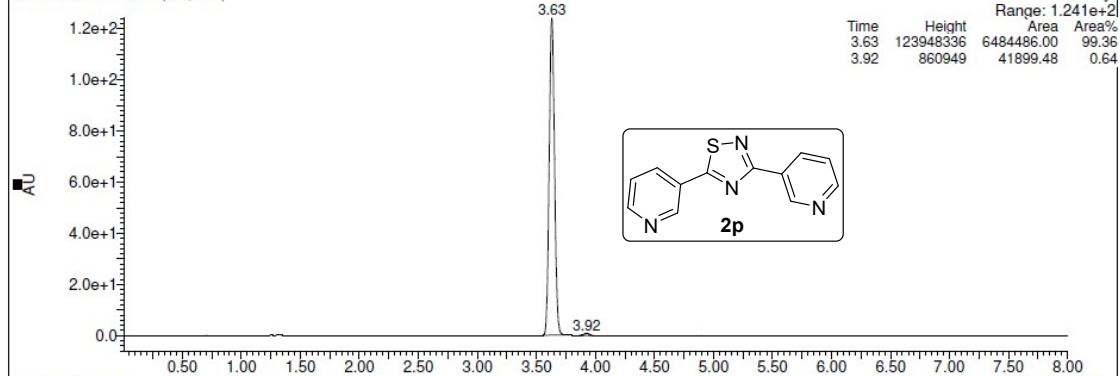

512406D171P-A

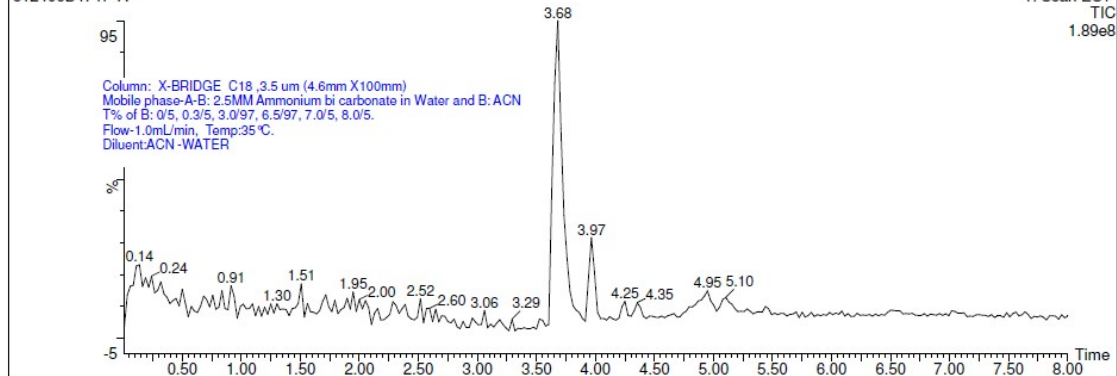

SAMPLE CODE: C5747-110  
Acq Method: ARAGEN\_LCMS\_305

Aragen Life Sciences Private Limited  
Discovery Chemistry Analytical Services

Date and Time: 13-Jun-2024; 10:30:53  
Instrument ID: ANL-MCL5-LCMS-032

512406D171P-A 142 (3.656)

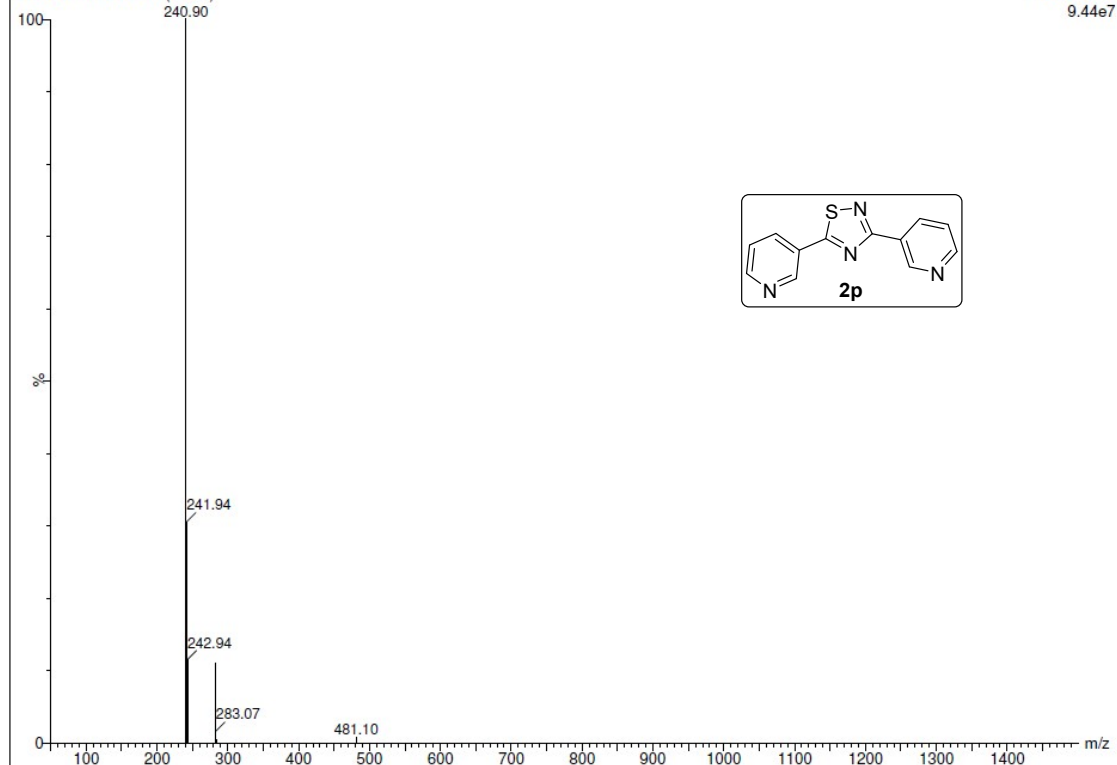



# <sup>1</sup>H NMR spectrum (400 MHz) of Compound (2q+2r) in DMSO-d<sub>6</sub>

C5747-87-peak-2

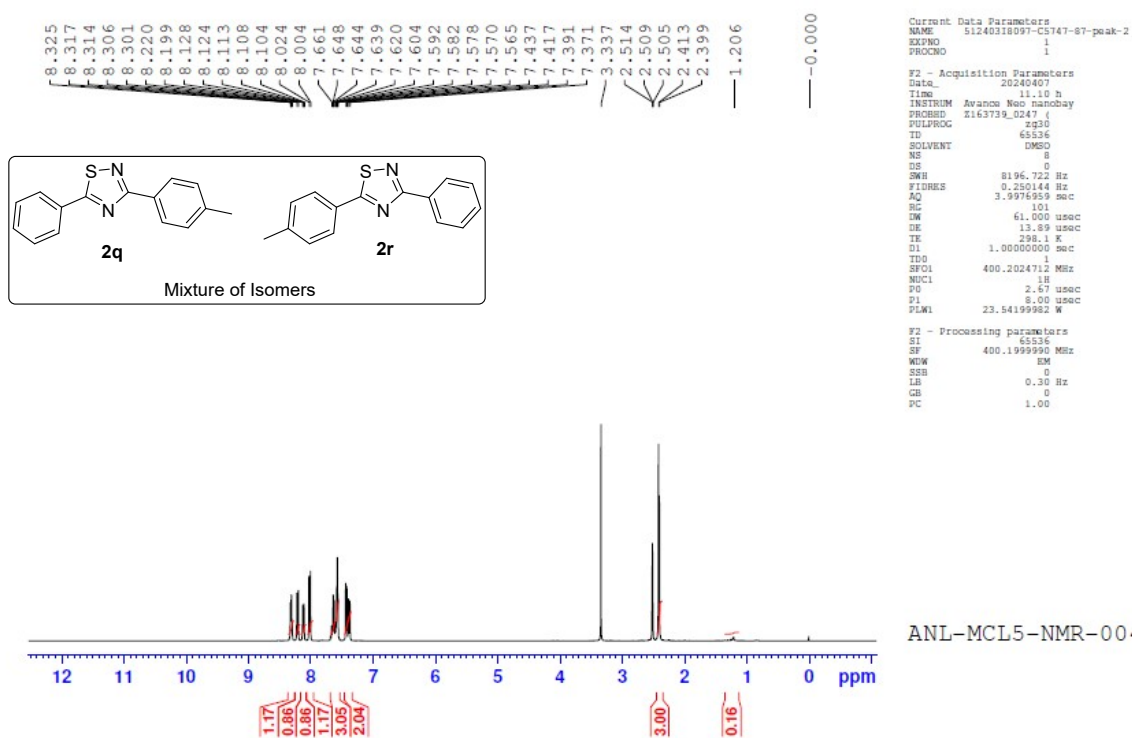

C5747-87-peak-2

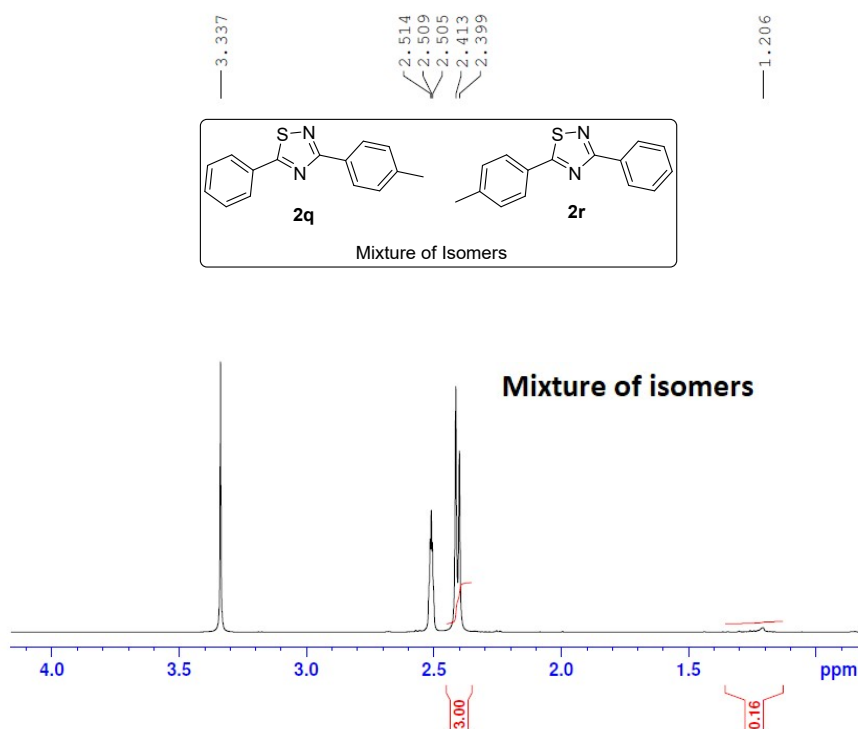

Current Data Parameters  
NAME 51240318097-C5747-87-peak-2  
EXPNO 1  
PROCNO 1

F2 - Acquisition Parameters  
Date\_ 20240407  
Time 11.10 h  
INSTRUM Avance Neo nanobay  
PROBHD Z163739\_0247 (4  
PULPROG zg30  
TD 65536  
SOLVENT DMSO  
NS 8  
DS 0  
SWH 8196.722 Hz  
FIDRES 0.250144 Hz  
AQ 3.9976959 sec  
RG 101  
DW 61.000 usec  
DE 13.89 usec  
TE 298.1 K  
D1 1.00000000 sec  
TD0 1  
SFO1 400.2024712 MHz  
NUC1 1H  
P0 2.67 usec  
P1 8.00 usec  
PLW1 23.54199982 W

F2 - Processing parameters  
SI 65536  
SF 400.1999990 MHz  
WDW EM  
SSB 0  
LB 0.30 Hz  
GB 0  
PC 1.00

ANL-MCL5-NMR-004

C5747-87-peak-2

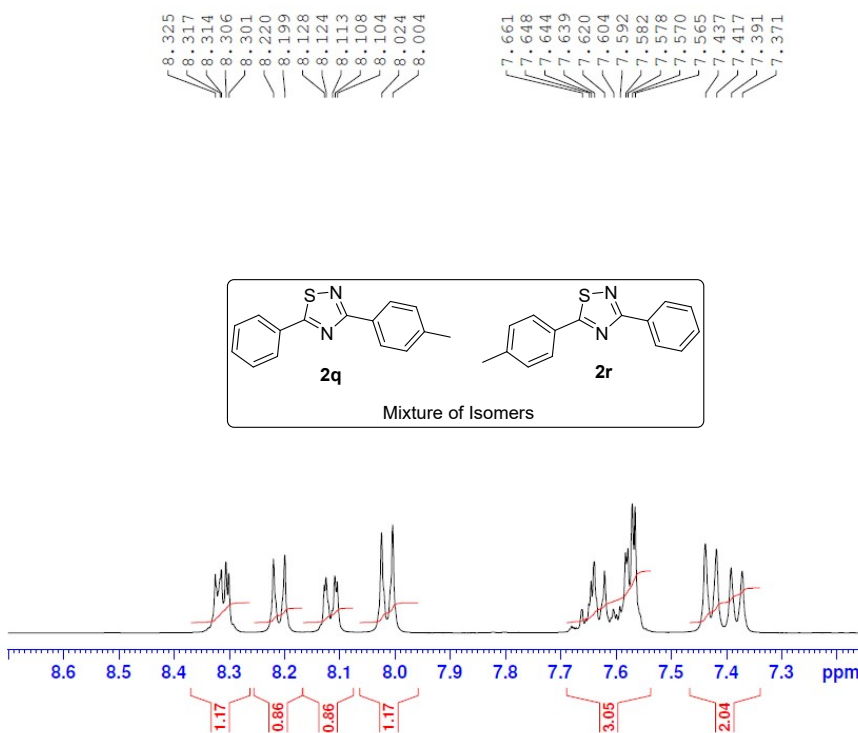

Current Data Parameters  
NAME 51240318097-C5747-87-peak-2  
EXPNO 1  
PROCNO 1

F2 - Acquisition Parameters  
Date\_ 20240407  
Time 11.10 h  
INSTRUM Avance Neo nanobay  
PROBHD Z163739\_0247 (4  
PULPROG zg30  
TD 65536  
SOLVENT DMSO  
NS 8  
DS 0  
SWH 8196.722 Hz  
FIDRES 0.250144 Hz  
AQ 3.9976959 sec  
RG 101  
DW 61.000 usec  
DE 13.89 usec  
TE 298.1 K  
D1 1.00000000 sec  
TD0 1  
SFO1 400.2024712 MHz  
NUC1 1H  
P0 2.67 usec  
P1 8.00 usec  
PLW1 23.54199982 W

F2 - Processing parameters  
SI 65536  
SF 400.1999990 MHz  
WDW EM  
SSB 0  
LB 0.30 Hz  
GB 0  
PC 1.00

ANL-MCL5-NMR-004

# <sup>13</sup>C NMR spectrum (100 MHz) of Compound (2q+2r) in DMSO-*d*<sub>6</sub>

C5747-87-peak-2

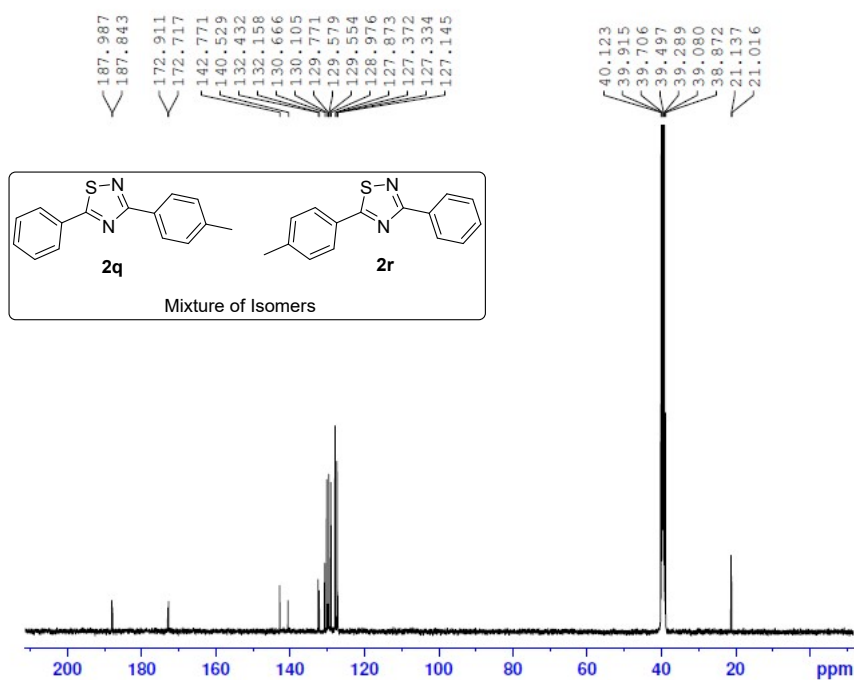

```

Current Data Parameters
NAME      51240318097-C5747-87-peak-2
EXPNO     2
PROCNO    1

F2 - Acquisition Parameters
Date_     20240407
Time      12.19 h
INSTRUM   Avance Neo (magnabay)
PROBHD    Z163739_0247 (
PULPROG   zgpg30
TD         65536
SOLVENT    DMSO
NS         877
DS         4
SWH        23809.523 Hz
FIDRES     0.725609 Hz
AQ         1.3762560 sec
RG         101
SWH        21.000 usec
DE         6.50 usec
TE         298.2 K
D1         3.00000000 sec
D11        0.03000000 sec
TD0        1
SFO1       100.6404331 MHz
NUC1       13C
RG         2.67 usec
P1         8.00 usec
PLM1       100.62999725 W
SFO2       400.2016008 MHz
NUC2       1H
CPOPRG2    waltz16
PCPD2      90.00 usec
PLM2       23.54199982 W
PLM12      0.18601000 W
PLM13      0.09356200 W

F2 - Processing parameters
SI         32768
SF         100.6304208 MHz
WDW        EM
SSB        0
LB         2.00 Hz
GB         0
PC         1.40
    
```

ANL-MCL5-NMR-004

C5747-87-peak-2

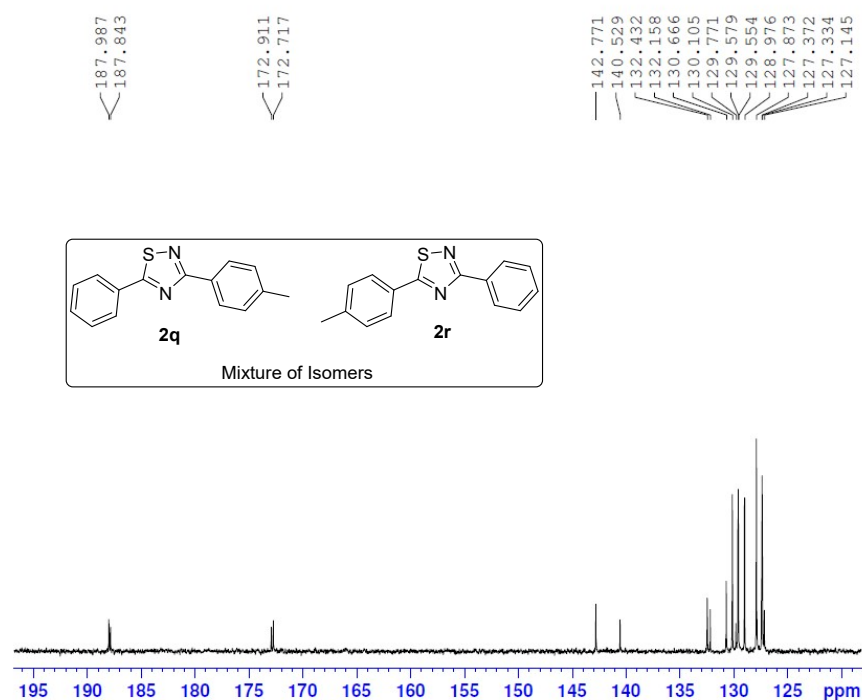

Current Data Parameters  
 NAME 51240318097-C5747-87-peak-2  
 EXPNO 2  
 PROCNO 1  
 F2 - Acquisition Parameters  
 Date\_ 20240407  
 Time 12.19 h  
 INSTRUM Avance Neo nanobay  
 PROBHD Z163739\_0247 (zpgp30)  
 PULPROG zgpg30  
 TD 65536  
 SOLVENT DMSO  
 NS 877  
 DS 4  
 SWH 23809.523 Hz  
 FIDRES 0.726609 Hz  
 AQ 1.3762560 sec  
 RG 101  
 DW 21.000 usec  
 DE 6.50 usec  
 TE 298.2 K  
 D1 3.00000000 sec  
 D11 0.03000000 sec  
 TDO 1  
 SFO1 100.6404331 MHz  
 NUC1 13C  
 P0 2.67 usec  
 P1 8.00 usec  
 PLW1 100.62999725 W  
 SFO2 400.2016008 MHz  
 NUC2 1H  
 CPDPRG2 waltz65  
 PCPD2 90.00 usec  
 PLW2 23.54199982 W  
 PLW12 0.18601000 W  
 PLW13 0.09356200 W  
 F2 - Processing parameters  
 SI 32768  
 SF 100.6304208 MHz  
 WDW EM  
 SSB 0  
 LB 2.00 Hz  
 GB 0  
 PC 1.40

ANL-MCL5-NMR-004

C5747-87-peak-2

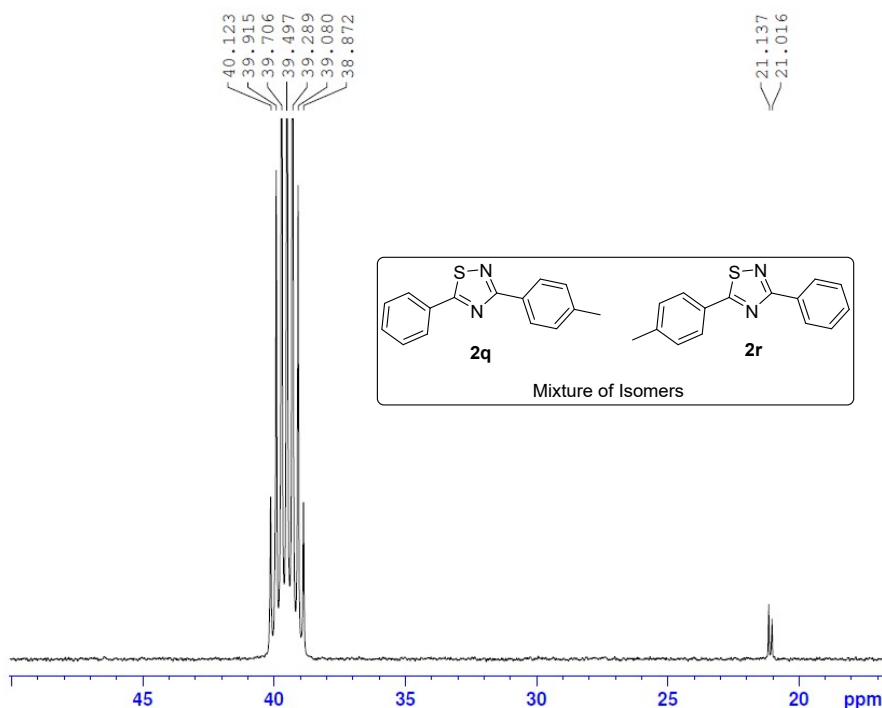

Current Data Parameters  
 NAME 51240318097-C5747-87-peak-2  
 EXPNO 2  
 PROCNO 1  
 F2 - Acquisition Parameters  
 Date\_ 20240407  
 Time 12.19 h  
 INSTRUM Avance Neo nanobay  
 PROBHD Z163739\_0247 (zpgp30)  
 PULPROG zgpg30  
 TD 65536  
 SOLVENT DMSO  
 NS 877  
 DS 4  
 SWH 23809.523 Hz  
 FIDRES 0.726609 Hz  
 AQ 1.3762560 sec  
 RG 101  
 DW 21.000 usec  
 DE 6.50 usec  
 TE 298.2 K  
 D1 3.00000000 sec  
 D11 0.03000000 sec  
 TDO 1  
 SFO1 100.6404331 MHz  
 NUC1 13C  
 P0 2.67 usec  
 P1 8.00 usec  
 PLW1 100.62999725 W  
 SFO2 400.2016008 MHz  
 NUC2 1H  
 CPDPRG2 waltz65  
 PCPD2 90.00 usec  
 PLW2 23.54199982 W  
 PLW12 0.18601000 W  
 PLW13 0.09356200 W  
 F2 - Processing parameters  
 SI 32768  
 SF 100.6304208 MHz  
 WDW EM  
 SSB 0  
 LB 2.00 Hz  
 GB 0  
 PC 1.40

ANL-MCL5-NMR-004

## LCMS spectrum of Compound (2q+2r)

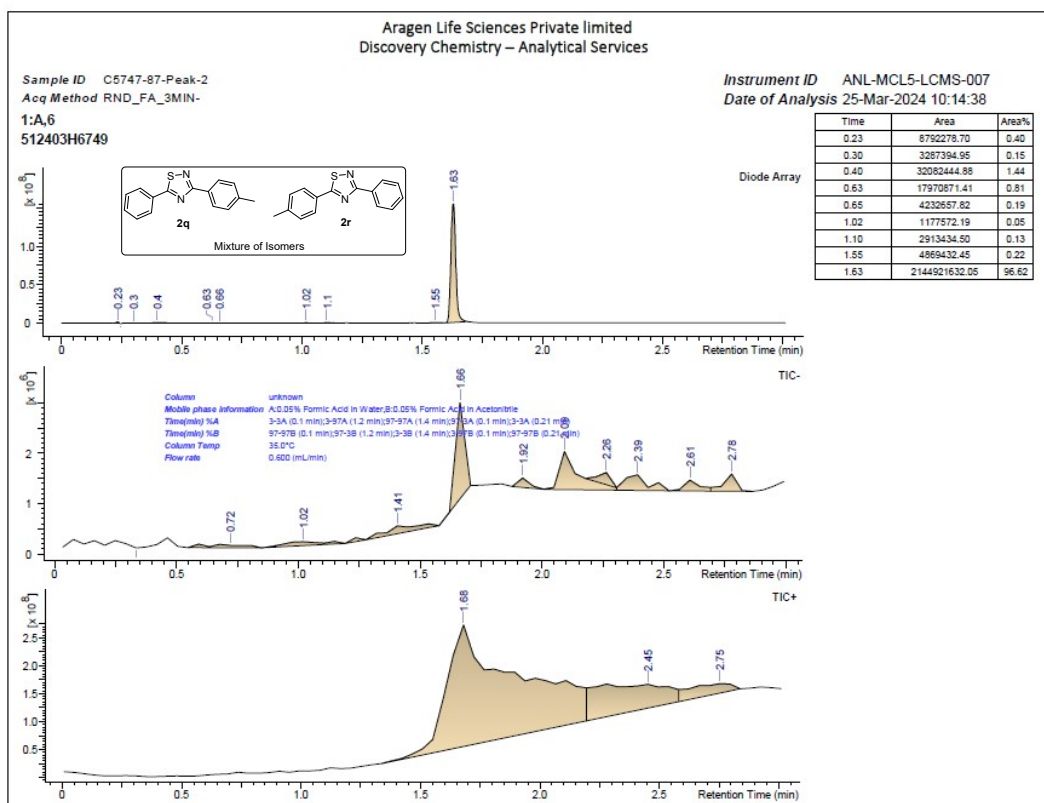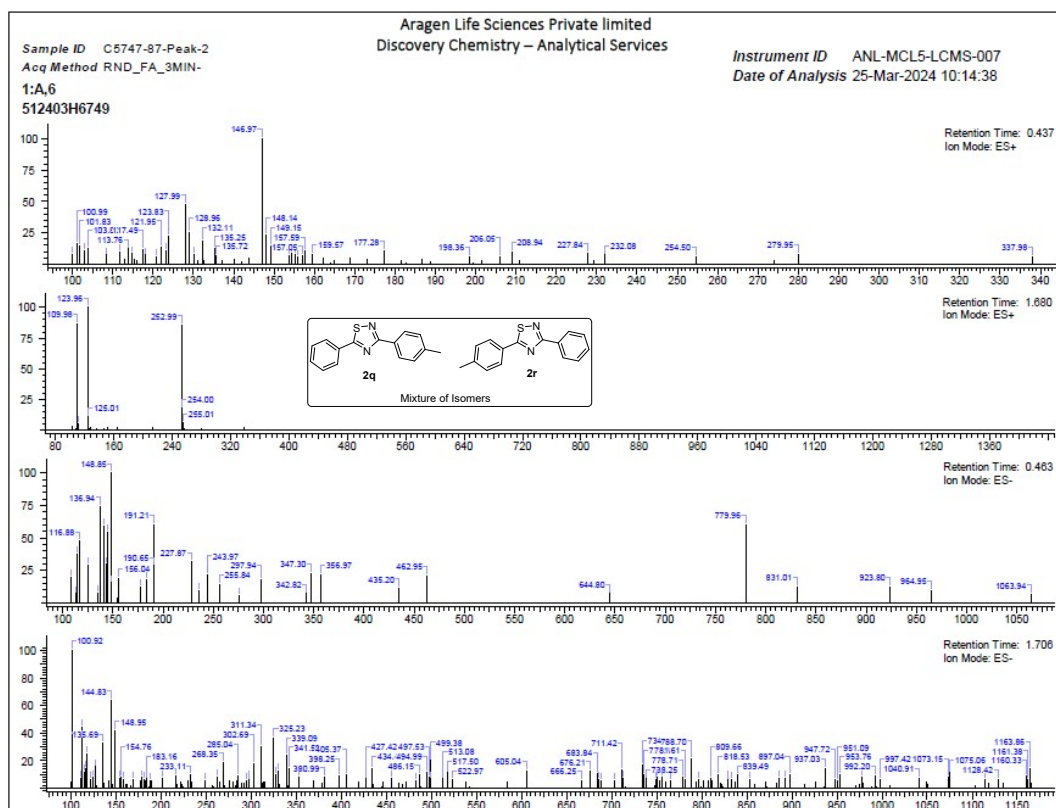

## Chiral HPLC spectrum of Compound (2q+2r)

sepiatec

SFC Report

aragen

Sample Name : ARG-FMC-1008-c5747-87-Peak-2  
 Date : 20.08.2025 18:58  
 Method : 3g\_40%\_A1- 10 Mins  
 Injection Volume (µl) : 5  
 Vial Position : F3  
 Column Name : CHIRALCEL OJ-H (4.6\*250MM) 5µ  
 Co-Solvent : 0.5% DEA IN METHANOL  
 Co-Solvent % : 40  
 Temperature (°C) : 30  
 Flow (mL/min) : 3  
 Back Pressure (bar) : 100  
 Detector (nm) : 254  
 Instrument Name : ANL-MCL5-SFC-026

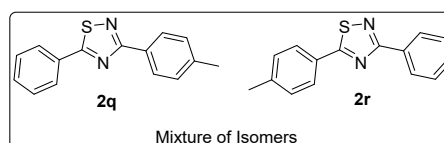

CHIRAL REPORT  
 CONFIDENTIAL

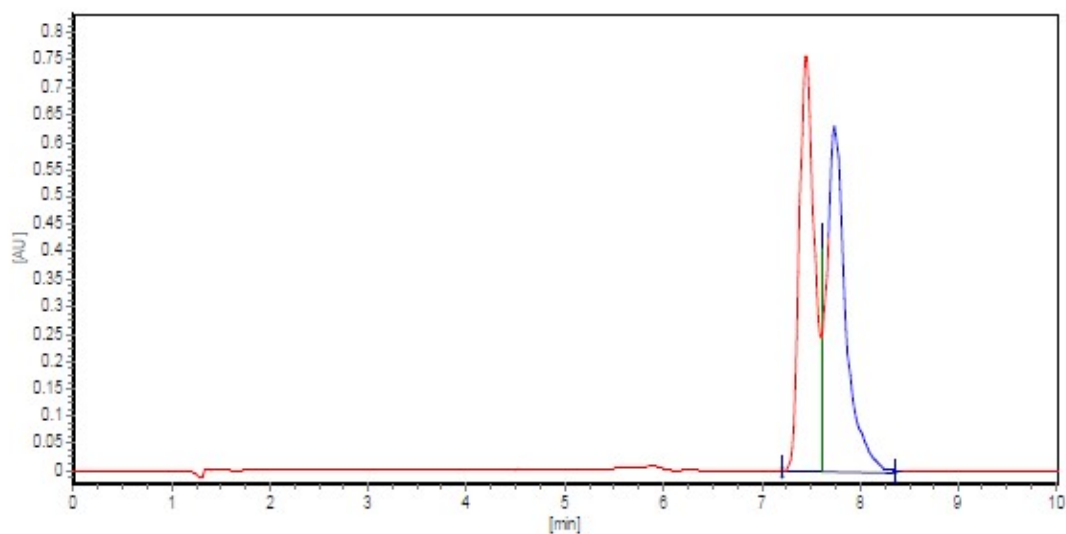

| Peak No. | RT   | Area    | % Area |
|----------|------|---------|--------|
| 1        | 7.4  | 9496467 | 56.08  |
| 2        | 7.68 | 7437184 | 43.92  |

# <sup>1</sup>H NMR spectrum (400 MHz) of Compound (2s+2t) in DMSO-d<sub>6</sub>

C5747-90-peak-1

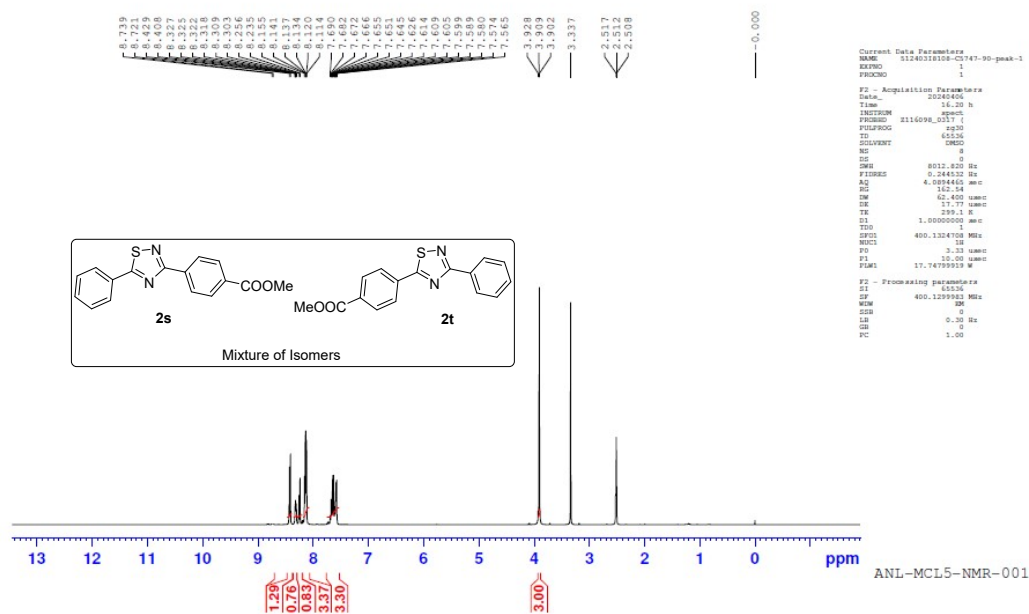

C5 / 4 / -90-peak-1

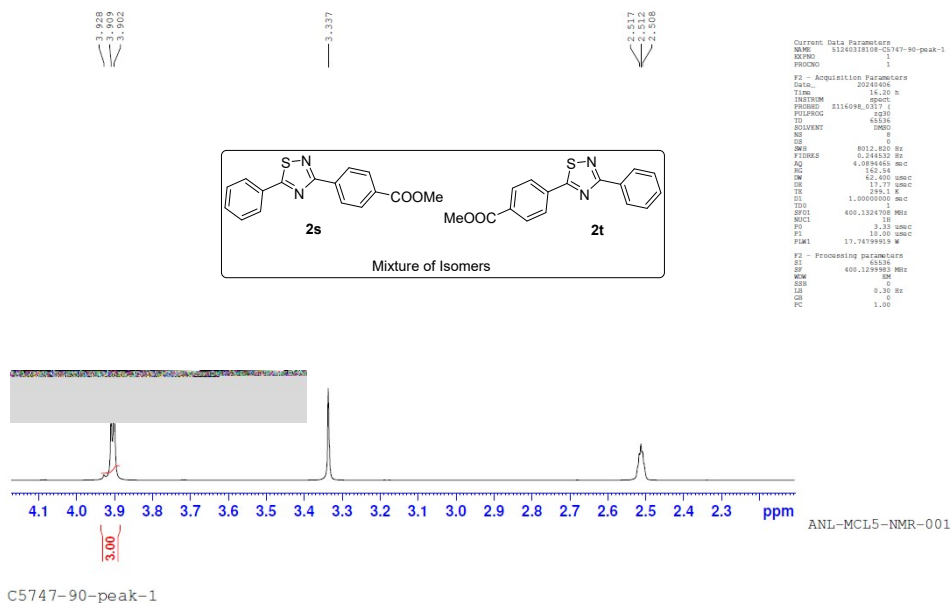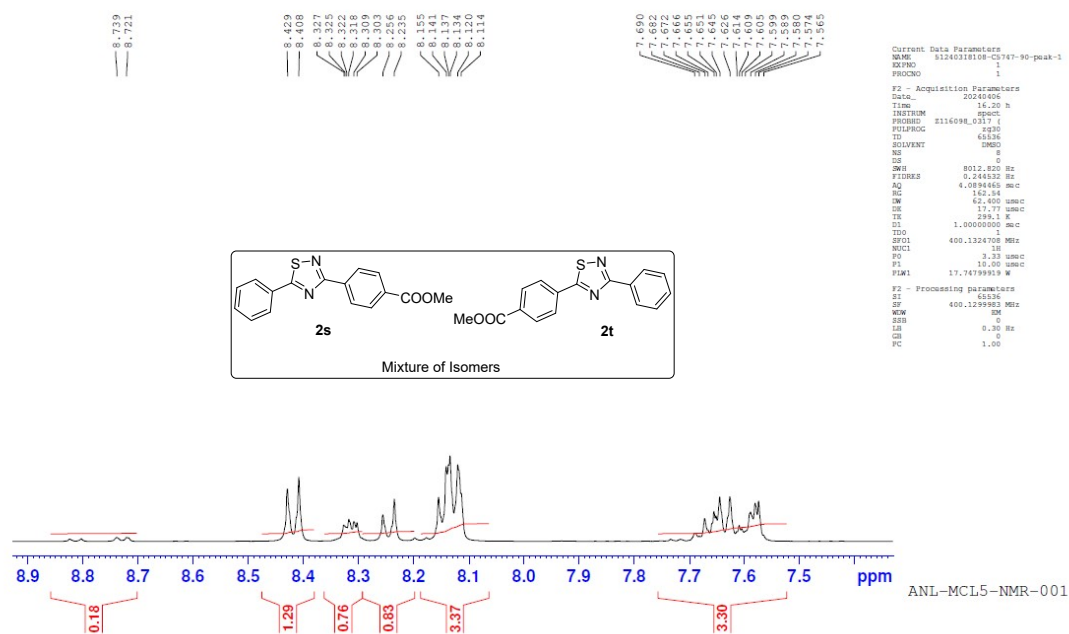



# <sup>13</sup>C NMR spectrum (100 MHz) of Compound (2s+2t) in DMSO-d<sub>6</sub>

C5747-90-peak-1

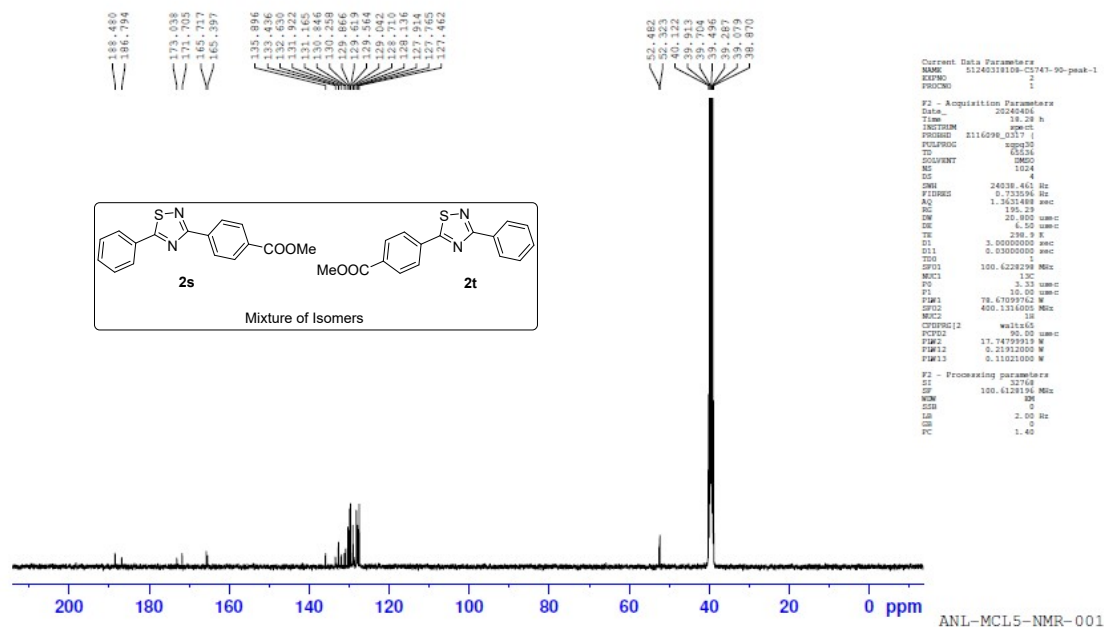

C5747-90-peak-1

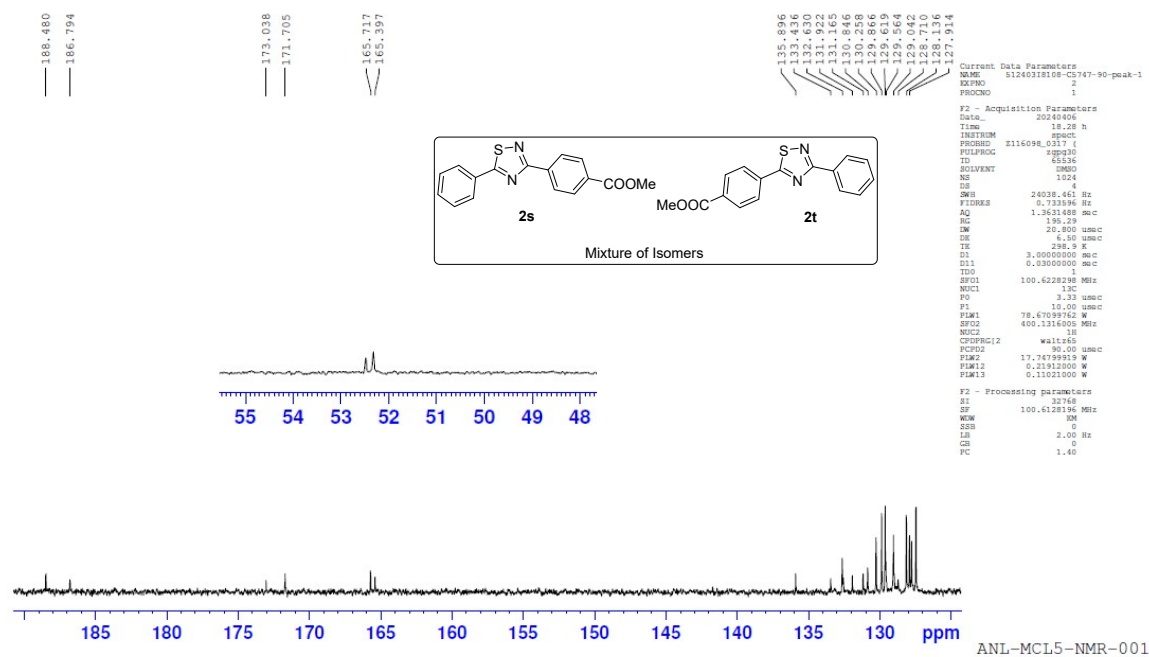

C5747-90-peak-1

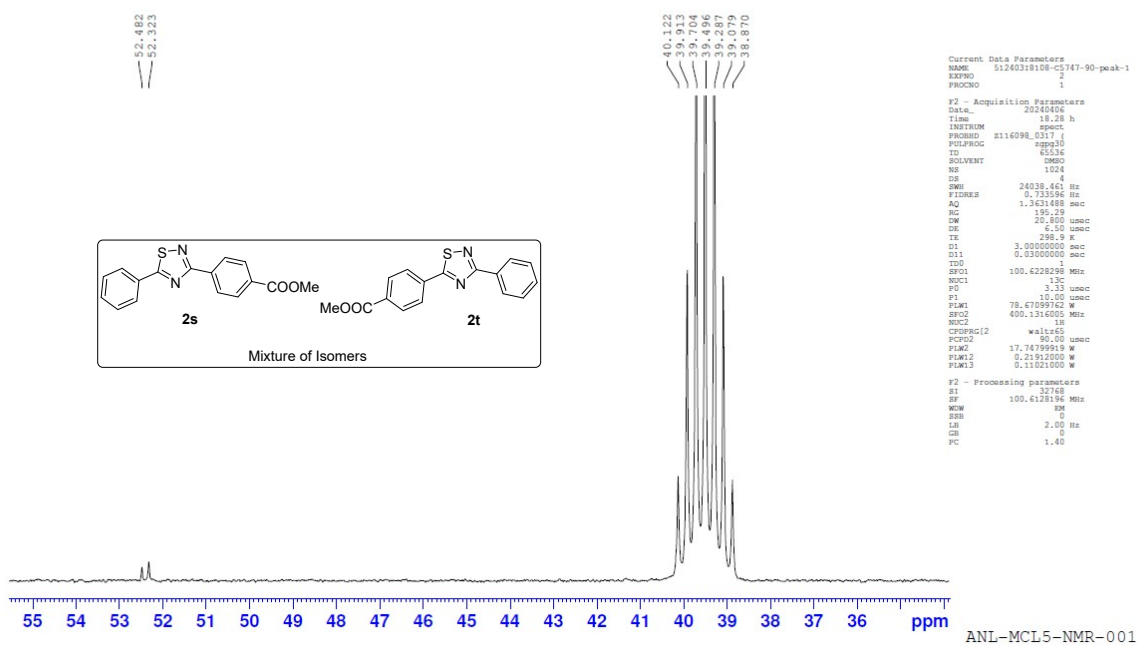

LCMS spectrum of Compound (2s+2t)



Sample Name : ARG-FMC-1008-C5747-90-Peak-1  
Date : 20.08.2025 18:58  
Method : 3g\_40%\_A1- 10 Mins  
Injection Volume (µl) : 5  
Vial Position : F4  
Column Name : (R,R) WHELK-01 (4.6\*250MM) 5µ  
Co-Solvent : 0.5% DEA IN METHANOL  
Co-Solvent % : 40  
Temperature (°C) : 30  
Flow (mL/min) : 3  
Back Pressure (bar) : 100  
Detector (nm) : 254  
Instrument Name : ANL-MCL5-SFC-026

CHIRAL REPORT  
CONFIDENTIAL

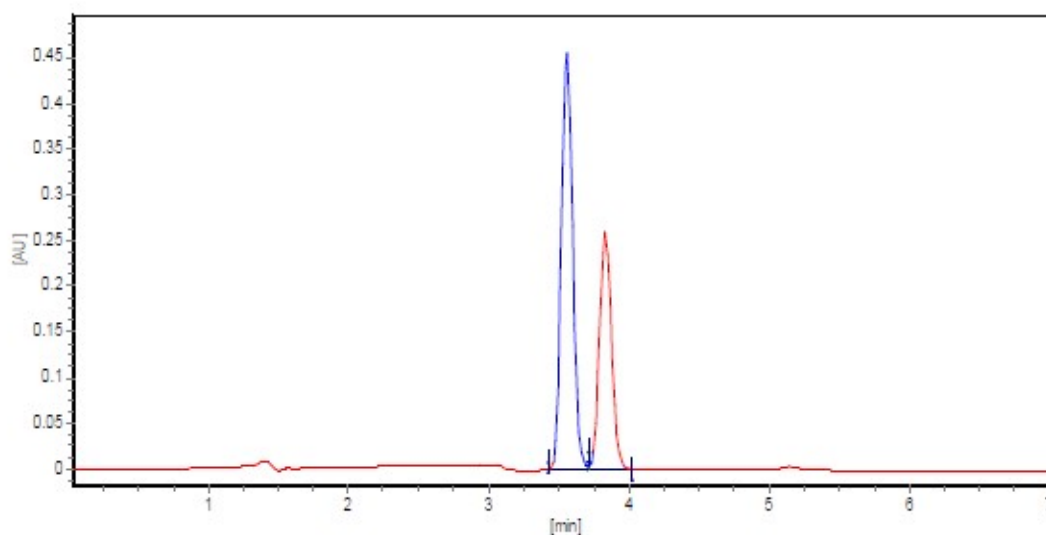

| Peak No. | RT   | Area    | % Area |
|----------|------|---------|--------|
| 1        | 3.53 | 2547296 | 62.68  |
| 2        | 3.8  | 1516964 | 37.32  |
